# Supplementary material for: Maternal prenatal stress exposure and sex-specific risk of severe infection in offspring
Source: PubMed Central journal article supplement (PMC7845992; doi:10.1371/journal.pone.0245747), 2021-01-29
Supplement: pone.0245747.s003.pdf [file pone.0245747.s003.pdf]

# THE LANCET Infectious Diseases

## Supplementary webappendix

This webappendix formed part of the original submission and has been peer reviewed. We post it as supplied by the authors.

Supplement to: Miller JE, Hammond GC, Strunk T, et al. Association of gestational age and growth measures at birth with infection-related admissions to hospital throughout childhood: a population-based, data-linkage study from Western Australia. *Lancet Infect Dis* 2016; published online April 1. [http://dx.doi.org/10.1016/S1473-3099\(16\)00150-X](http://dx.doi.org/10.1016/S1473-3099(16)00150-X).

### Supplementary Table: ICD codes for all infection diagnostic group

|        |                                               |
|--------|-----------------------------------------------|
| 001.0  | CHOLERA D/T VIB CHOLERAE (ICD9)               |
| 001.1  | CHOLERA D/T VIB EL TOR (ICD9)                 |
| 001.9  | CHOLERA NOS (ICD9)                            |
| 002.0  | TYPHOID FEVER (ICD9)                          |
| 002.1  | PARATYPHOID FEVER A (ICD9)                    |
| 002.2  | PARATYPHOID FEVER B (ICD9)                    |
| 002.3  | PARATYPHOID FEVER C (ICD9)                    |
| 002.9  | PARATYPHOID FEVER NOS (ICD9)                  |
| 003.0  | SALMONELLA ENTERITIS (ICD9)                   |
| 003.1  | SALMONELLA SEPTICEMIA (ICD9)                  |
| 003.20 | LOCAL SALMONELLA INF NOS (ICD9)               |
| 003.21 | SALMONELLA MENINGITIS (ICD9)                  |
| 003.22 | SALMONELLA PNEUMONIA (ICD9)                   |
| 003.23 | SALMONELLA ARTHRITIS (ICD9)                   |
| 003.24 | SALMONELLA OSTEOMYELITIS (ICD9)               |
| 003.29 | LOCAL SALMONELLA INF NEC (ICD9)               |
| 003.8  | SALMONELLA INFECTION NEC (ICD9)               |
| 003.9  | SALMONELLA INFECTION NOS (ICD9)               |
| 004.0  | SHIGELLA DYSENTERIAE (ICD9)                   |
| 004.1  | SHIGELLA FLEXNERI (ICD9)                      |
| 004.2  | SHIGELLA BOYDII (ICD9)                        |
| 004.3  | SHIGELLA SONNEI (ICD9)                        |
| 004.8  | SHIGELLA INFECTION NEC (ICD9)                 |
| 004.9  | SHIGELLOSIS NOS (ICD9)                        |
| 005.0  | STAPH FOOD POISONING (ICD9)                   |
| 005.1  | BOTULISM (ICD9)                               |
| 005.2  | FOOD POIS D/T C. PERFRIN (ICD9)               |
| 005.3  | FOOD POIS: CLOSTRID NEC (ICD9)                |
| 005.4  | FOOD POIS: V. PARAHAEM (ICD9)                 |
| 005.8  | BACT FOOD POISONING NEC (End 1995) (ICD9)     |
| 005.81 | FOOD POISONING VIBRIO (Begin 1995) (ICD9)     |
| 005.89 | OTH BACT FOOD POISONING (Begin 1995) (ICD9)   |
| 005.9  | FOOD POISONING NOS (ICD9)                     |
| 006.0  | AC AMEBIASIS W/O ABSCESS (ICD9)               |
| 006.1  | CHR AMEBIASIS W/O ABSCES (ICD9)               |
| 006.2  | AMEBIC NONDYSENT COLITIS (ICD9)               |
| 006.3  | AMEBIC LIVER ABSCESS (ICD9)                   |
| 006.4  | AMEBIC LUNG ABSCESS (ICD9)                    |
| 006.5  | AMEBIC BRAIN ABSCESS (ICD9)                   |
| 006.6  | AMEBIC SKIN ULCERATION (ICD9)                 |
| 006.8  | AMEBIC INFECTION NEC (ICD9)                   |
| 006.9  | AMEBIASIS NOS (ICD9)                          |
| 007.0  | BALANTIDIASIS (ICD9)                          |
| 007.1  | GIARDIASIS (ICD9)                             |
| 007.2  | COCCIDIOSIS (ICD9)                            |
| 007.3  | INTEST TRICHOMONIASIS (ICD9)                  |
| 007.4  | OT PROTOZ INTEST DX- CRYP (Begin 1997) (ICD9) |
| 007.5  | CYCLOSPORIASIS (Begin 2000) (ICD9)            |
| 007.8  | PROTOZOAL INTEST DIS NEC (ICD9)               |
| 007.9  | PROTOZOAL INTEST DIS NOS (ICD9)               |
| 008.0  | E. COLI ENTERITIS (Begin 1980 (ICD9)          |
| 008.00 | E. COLI ENTERITIS-NOS (Begin 1992) (ICD9)     |
| 008.01 | E. COLI ENTERITIS-PATH (Begin 1992) (ICD9)    |
| 008.02 | E. COLI ENTERITIS-TOX (Begin 1992) (ICD9)     |
| 008.03 | E. COLI ENTERITIS-INVAS (Begin 1992) (ICD9)   |
| 008.04 | E. COLI ENTERITIS-HEMOR (Begin 1992) (ICD9)   |
| 008.09 | E. COLI ENTERITIS-OTHER (Begin 1992) (ICD9)   |
| 008.1  | ARIZONA ENTERITIS (ICD9)                      |

008.2 AEROBACTER ENTERITIS (ICD9)  
 008.3 PROTEUS ENTERITIS (ICD9)  
 008.41 STAPHYLOCOCC ENTERITIS (ICD9)  
 008.42 PSEUDOMONAS ENTERITIS (ICD9)  
 008.43 CAMPYLOBACTER (Begin 1992) (ICD9)  
 008.44 YERSINIA (Begin 1992) (ICD9)  
 008.45 CLOSTRIDIUM DIF (Begin 1992) (ICD9)  
 008.46 OTHER ANAEROBES (Begin 1992) (ICD9)  
 008.47 OTH GRAM NEG BACT (Begin 1992) (ICD9)  
 008.49 BACTERIAL ENTERITIS NEC (ICD9)  
 008.5 BACTERIAL ENTERITIS NOS (ICD9)  
 008.6 VIRAL ENTERITIS NEC (Begin 1980 (ICD9)  
 008.61 ROTAVIRUS ENTERITIS (Begin 1992) (ICD9)  
 008.62 ADENOVIR ENTERITIS (Begin 1992) (ICD9)  
 008.63 NORWALK VIR ENTERITIS (Begin 1992) (ICD9)  
 008.64 SML ROUND VIR ENTERITIS (Begin 1992) (ICD9)  
 008.65 CALCIVIRUS ENTERITIS (Begin 1992) (ICD9)  
 008.66 ASTROVIRUS ENTERITIS (Begin 1992) (ICD9)  
 008.67 ENTERITIS NEC (Begin 1992) (ICD9)  
 008.69 ENTERITIS NOS (Begin 1992) (ICD9)  
 008.8 VIRAL ENTERITIS NOS (ICD9)  
 009.0 INFECTIOUS ENTERITIS NOS (ICD9)  
 009.1 ENTERITIS OF INFECT ORIG (ICD9)  
 009.2 INFECTIOUS DIARRHEA NOS (ICD9)  
 009.3 DIARRHEA OF INFECT ORIG (ICD9)  
 010.00 PRIM TB COMPLEX-UNSPEC (ICD9)  
 010.01 PRIM TB COMPLEX-NO EXAM (ICD9)  
 010.02 PRIM TB COMPLEX-EXM UNKN (ICD9)  
 010.03 PRIM TB COMPLEX-MICRO DX (ICD9)  
 010.04 PRIM TB COMPLEX-CULT DX (ICD9)  
 010.05 PRIM TB COMPLEX-HISTO DX (ICD9)  
 010.06 PRIM TB COMPLEX-OTH TEST (ICD9)  
 010.10 PRIM TB PLEURISY-UNSPEC (ICD9)  
 010.11 PRIM TB PLEURISY-NO EXAM (ICD9)  
 010.12 PRIM TB PLEUR-EXAM UNKN (ICD9)  
 010.13 PRIM TB PLEURIS-MICRO DX (ICD9)  
 010.14 PRIM TB PLEURISY-CULT DX (ICD9)  
 010.15 PRIM TB PLEURIS-HISTO DX (ICD9)  
 010.16 PRIM TB PLEURIS-OTH TEST (ICD9)  
 010.80 PRIM PROG TB NEC-UNSPEC (ICD9)  
 010.81 PRIM PROG TB NEC-NO EXAM (ICD9)  
 010.82 PRIM PR TB NEC-EXAM UNKN (ICD9)  
 010.83 PRIM PRG TB NEC-MICRO DX (ICD9)  
 010.84 PRIM PROG TB NEC-CULT DX (ICD9)  
 010.85 PRIM PRG TB NEC-HISTO DX (ICD9)  
 010.86 PRIM PRG TB NEC-OTH TEST (ICD9)  
 010.90 PRIMARY TB NOS-UNSPEC (ICD9)  
 010.91 PRIMARY TB NOS-NO EXAM (ICD9)  
 010.92 PRIMARY TB NOS-EXAM UNKN (ICD9)  
 010.93 PRIMARY TB NOS-MICRO DX (ICD9)  
 010.94 PRIMARY TB NOS-CULT DX (ICD9)  
 010.95 PRIMARY TB NOS-HISTO DX (ICD9)  
 010.96 PRIMARY TB NOS-OTH TEST (ICD9)  
 011.00 TB LUNG INFILTR-UNSPEC (ICD9)  
 011.01 TB LUNG INFILTR-NO EXAM (ICD9)  
 011.02 TB LUNG INFILTR-EXM UNKN (ICD9)  
 011.03 TB LUNG INFILTR-MICRO DX (ICD9)  
 011.04 TB LUNG INFILTR-CULT DX (ICD9)  
 011.05 TB LUNG INFILTR-HISTO DX (ICD9)  
 011.06 TB LUNG INFILTR-OTH TEST (ICD9)

011.10 TB LUNG NODULAR-UNSPEC (ICD9)  
011.11 TB LUNG NODULAR-NO EXAM (ICD9)  
011.12 TB LUNG NODUL-EXAM UNKN (ICD9)  
011.13 TB LUNG NODULAR-MICRO DX (ICD9)  
011.14 TB LUNG NODULAR-CULT DX (ICD9)  
011.15 TB LUNG NODULAR-HISTO DX (ICD9)  
011.16 TB LUNG NODULAR-OTH TEST (ICD9)  
011.20 TB LUNG W CAVITY-UNSPEC (ICD9)  
011.21 TB LUNG W CAVITY-NO EXAM (ICD9)  
011.22 TB LUNG CAVITY-EXAM UNKN (ICD9)  
011.23 TB LUNG W CAVIT-MICRO DX (ICD9)  
011.24 TB LUNG W CAVITY-CULT DX (ICD9)  
011.25 TB LUNG W CAVIT-HISTO DX (ICD9)  
011.26 TB LUNG W CAVIT-OTH TEST (ICD9)  
011.30 TB OF BRONCHUS-UNSPEC (ICD9)  
011.31 TB OF BRONCHUS-NO EXAM (ICD9)  
011.32 TB OF BRONCHUS-EXAM UNKN (ICD9)  
011.33 TB OF BRONCHUS-MICRO DX (ICD9)  
011.34 TB OF BRONCHUS-CULT DX (ICD9)  
011.35 TB OF BRONCHUS-HISTO DX (ICD9)  
011.36 TB OF BRONCHUS-OTH TEST (ICD9)  
011.40 TB LUNG FIBROSIS-UNSPEC (ICD9)  
011.41 TB LUNG FIBROSIS-NO EXAM (ICD9)  
011.42 TB LUNG FIBROS-EXAM UNKN (ICD9)  
011.43 TB LUNG FIBROS-MICRO DX (ICD9)  
011.44 TB LUNG FIBROSIS-CULT DX (ICD9)  
011.45 TB LUNG FIBROS-HISTO DX (ICD9)  
011.46 TB LUNG FIBROS-OTH TEST (ICD9)  
011.50 TB BRONCHIECTASIS-UNSPEC (ICD9)  
011.51 TB BRONCHIECT-NO EXAM (ICD9)  
011.52 TB BRONCHIECT-EXAM UNKN (ICD9)  
011.53 TB BRONCHIECT-MICRO DX (ICD9)  
011.54 TB BRONCHIECT-CULT DX (ICD9)  
011.55 TB BRONCHIECT-HISTO DX (ICD9)  
011.56 TB BRONCHIECT-OTH TEST (ICD9)  
011.60 TB PNEUMONIA-UNSPEC (ICD9)  
011.61 TB PNEUMONIA-NO EXAM (ICD9)  
011.62 TB PNEUMONIA-EXAM UNKN (ICD9)  
011.63 TB PNEUMONIA-MICRO DX (ICD9)  
011.64 TB PNEUMONIA-CULT DX (ICD9)  
011.65 TB PNEUMONIA-HISTO DX (ICD9)  
011.66 TB PNEUMONIA-OTH TEST (ICD9)  
011.70 TB PNEUMOTHORAX-UNSPEC (ICD9)  
011.71 TB PNEUMOTHORAX-NO EXAM (ICD9)  
011.72 TB PNEUMOTHORAX-EXAM UNKN (ICD9)  
011.73 TB PNEUMOTHORAX-MICRO DX (ICD9)  
011.74 TB PNEUMOTHORAX-CULT DX (ICD9)  
011.75 TB PNEUMOTHORAX-HISTO DX (ICD9)  
011.76 TB PNEUMOTHORAX-OTH TEST (ICD9)  
011.80 PULMONARY TB NEC-UNSPEC (ICD9)  
011.81 PULMONARY TB NEC-NO EXAM (ICD9)  
011.82 PULMON TB NEC-EXAM UNKN (ICD9)  
011.83 PULMON TB NEC-MICRO DX (ICD9)  
011.84 PULMON TB NEC-CULT DX (ICD9)  
011.85 PULMON TB NEC-HISTO DX (ICD9)  
011.86 PULMON TB NEC-OTH TEST (ICD9)  
011.90 PULMONARY TB NOS-UNSPEC (ICD9)  
011.91 PULMONARY TB NOS-NO EXAM (ICD9)  
011.92 PULMON TB NOS-EXAM UNKN (ICD9)  
011.93 PULMON TB NOS-MICRO DX (ICD9)

011.94 PULMON TB NOS-CULT DX (ICD9)  
011.95 PULMON TB NOS-HISTO DX (ICD9)  
011.96 PULMON TB NOS-OTH TEST (ICD9)  
012.00 TB PLEURISY-UNSPEC (ICD9)  
012.01 TB PLEURISY-NO EXAM (ICD9)  
012.02 TB PLEURISY-EXAM UNKN (ICD9)  
012.03 TB PLEURISY-MICRO DX (ICD9)  
012.04 TB PLEURISY-CULT DX (ICD9)  
012.05 TB PLEURISY-HISTOLOG DX (ICD9)  
012.06 TB PLEURISY-OTH TEST (ICD9)  
012.10 TB THORACIC NODES-UNSPEC (ICD9)  
012.11 TB THORAX NODE-NO EXAM (ICD9)  
012.12 TB THORAX NODE-EXAM UNKN (ICD9)  
012.13 TB THORAX NODE-MICRO DX (ICD9)  
012.14 TB THORAX NODE-CULT DX (ICD9)  
012.15 TB THORAX NODE-HISTO DX (ICD9)  
012.16 TB THORAX NODE-OTH TEST (ICD9)  
012.20 ISOL TRACHEAL TB-UNSPEC (ICD9)  
012.21 ISOL TRACHEAL TB-NO EXAM (ICD9)  
012.22 ISOL TRACH TB-EXAM UNKN (ICD9)  
012.23 ISOLAT TRACH TB-MICRO DX (ICD9)  
012.24 ISOL TRACHEAL TB-CULT DX (ICD9)  
012.25 ISOLAT TRACH TB-HISTO DX (ICD9)  
012.26 ISOLAT TRACH TB-OTH TEST (ICD9)  
012.30 TB LARYNGITIS-UNSPEC (ICD9)  
012.31 TB LARYNGITIS-NO EXAM (ICD9)  
012.32 TB LARYNGITIS-EXAM UNKN (ICD9)  
012.33 TB LARYNGITIS-MICRO DX (ICD9)  
012.34 TB LARYNGITIS-CULT DX (ICD9)  
012.35 TB LARYNGITIS-HISTO DX (ICD9)  
012.36 TB LARYNGITIS-OTH TEST (ICD9)  
012.80 RESP TB NEC-UNSPEC (ICD9)  
012.81 RESP TB NEC-NO EXAM (ICD9)  
012.82 RESP TB NEC-EXAM UNKN (ICD9)  
012.83 RESP TB NEC-MICRO DX (ICD9)  
012.84 RESP TB NEC-CULT DX (ICD9)  
012.85 RESP TB NEC-HISTO DX (ICD9)  
012.86 RESP TB NEC-OTH TEST (ICD9)  
013.00 TB MENINGITIS-UNSPEC (ICD9)  
013.01 TB MENINGITIS-NO EXAM (ICD9)  
013.02 TB MENINGITIS-EXAM UNKN (ICD9)  
013.03 TB MENINGITIS-MICRO DX (ICD9)  
013.04 TB MENINGITIS-CULT DX (ICD9)  
013.05 TB MENINGITIS-HISTO DX (ICD9)  
013.06 TB MENINGITIS-OTH TEST (ICD9)  
013.10 TUBRCLMA MENINGES-UNSPEC (ICD9)  
013.11 TUBRCLMA MENING-NO EXAM (ICD9)  
013.12 TUBRCLMA MENIN-EXAM UNKN (ICD9)  
013.13 TUBRCLMA MENING-MICRO DX (ICD9)  
013.14 TUBRCLMA MENING-CULT DX (ICD9)  
013.15 TUBRCLMA MENING-HISTO DX (ICD9)  
013.16 TUBRCLMA MENING-OTH TEST (ICD9)  
013.20 TUBERCULOMA BRAIN-UNSPEC (ICD9)  
013.21 TUBRCLOMA BRAIN-NO EXAM (ICD9)  
013.22 TUBRCLMA BRAIN-EXAM UNKN (ICD9)  
013.23 TUBRCLOMA BRAIN-MICRO DX (ICD9)  
013.24 TUBRCLOMA BRAIN-CULT DX (ICD9)  
013.25 TUBRCLOMA BRAIN-HISTO DX (ICD9)  
013.26 TUBRCLOMA BRAIN-OTH TEST (ICD9)  
013.30 TB BRAIN ABSCESS-UNSPEC (ICD9)

013.31 TB BRAIN ABSCESS-NO EXAM (ICD9)  
013.32 TB BRAIN ABSC-EXAM UNKN (ICD9)  
013.33 TB BRAIN ABSC-MICRO DX (ICD9)  
013.34 TB BRAIN ABSCESS-CULT DX (ICD9)  
013.35 TB BRAIN ABSC-HISTO DX (ICD9)  
013.36 TB BRAIN ABSC-OTH TEST (ICD9)  
013.40 TUBRCLMA SP CORD-UNSPEC (ICD9)  
013.41 TUBRCLMA SP CORD-NO EXAM (ICD9)  
013.42 TUBRCLMA SP CD-EXAM UNKN (ICD9)  
013.43 TUBRCLMA SP CRD-MICRO DX (ICD9)  
013.44 TUBRCLMA SP CORD-CULT DX (ICD9)  
013.45 TUBRCLMA SP CRD-HISTO DX (ICD9)  
013.46 TUBRCLMA SP CRD-OTH TEST (ICD9)  
013.50 TB SP CRD ABSCESS-UNSPEC (ICD9)  
013.51 TB SP CRD ABSC-NO EXAM (ICD9)  
013.52 TB SP CRD ABSC-EXAM UNKN (ICD9)  
013.53 TB SP CRD ABSC-MICRO DX (ICD9)  
013.54 TB SP CRD ABSC-CULT DX (ICD9)  
013.55 TB SP CRD ABSC-HISTO DX (ICD9)  
013.56 TB SP CRD ABSC-OTH TEST (ICD9)  
013.60 TB ENCEPHALITIS-UNSPEC (ICD9)  
013.61 TB ENCEPHALITIS-NO EXAM (ICD9)  
013.62 TB ENCEPHALIT-EXAM UNKN (ICD9)  
013.63 TB ENCEPHALITIS-MICRO DX (ICD9)  
013.64 TB ENCEPHALITIS-CULT DX (ICD9)  
013.65 TB ENCEPHALITIS-HISTO DX (ICD9)  
013.66 TB ENCEPHALITIS-OTH TEST (ICD9)  
013.80 CNS TB NEC-UNSPEC (ICD9)  
013.81 CNS TB NEC-NO EXAM (ICD9)  
013.82 CNS TB NEC-EXAM UNKN (ICD9)  
013.83 CNS TB NEC-MICRO DX (ICD9)  
013.84 CNS TB NEC-CULT DX (ICD9)  
013.85 CNS TB NEC-HISTO DX (ICD9)  
013.86 CNS TB NEC-OTH TEST (ICD9)  
013.90 CNS TB NOS-UNSPEC (ICD9)  
013.91 CNS TB NOS-NO EXAM (ICD9)  
013.92 CNS TB NOS-EXAM UNKN (ICD9)  
013.93 CNS TB NOS-MICRO DX (ICD9)  
013.94 CNS TB NOS-CULT DX (ICD9)  
013.95 CNS TB NOS-HISTO DX (ICD9)  
013.96 CNS TB NOS-OTH TEST (ICD9)  
014.00 TB PERITONITIS-UNSPEC (ICD9)  
014.01 TB PERITONITIS-NO EXAM (ICD9)  
014.02 TB PERITONITIS-EXAM UNKN (ICD9)  
014.03 TB PERITONITIS-MICRO DX (ICD9)  
014.04 TB PERITONITIS-CULT DX (ICD9)  
014.05 TB PERITONITIS-HISTO DX (ICD9)  
014.06 TB PERITONITIS-OTH TEST (ICD9)  
014.80 INTESTINAL TB NEC-UNSPEC (ICD9)  
014.81 INTESTIN TB NEC-NO EXAM (ICD9)  
014.82 INTEST TB NEC-EXAM UNKN (ICD9)  
014.83 INTESTIN TB NEC-MICRO DX (ICD9)  
014.84 INTESTIN TB NEC-CULT DX (ICD9)  
014.85 INTESTIN TB NEC-HISTO DX (ICD9)  
014.86 INTESTIN TB NEC-OTH TEST (ICD9)  
015.00 TB OF VERTEBRA-UNSPEC (ICD9)  
015.01 TB OF VERTEBRA-NO EXAM (ICD9)  
015.02 TB OF VERTEBRA-EXAM UNKN (ICD9)  
015.03 TB OF VERTEBRA-MICRO DX (ICD9)  
015.04 TB OF VERTEBRA-CULT DX (ICD9)

015.05 TB OF VERTEBRA-HISTO DX (ICD9)  
015.06 TB OF VERTEBRA-OTH TEST (ICD9)  
015.10 TB OF HIP-UNSPEC (ICD9)  
015.11 TB OF HIP-NO EXAM (ICD9)  
015.12 TB OF HIP-EXAM UNKN (ICD9)  
015.13 TB OF HIP-MICRO DX (ICD9)  
015.14 TB OF HIP-CULT DX (ICD9)  
015.15 TB OF HIP-HISTO DX (ICD9)  
015.16 TB OF HIP-OTH TEST (ICD9)  
015.20 TB OF KNEE-UNSPEC (ICD9)  
015.21 TB OF KNEE-NO EXAM (ICD9)  
015.22 TB OF KNEE-EXAM UNKN (ICD9)  
015.23 TB OF KNEE-MICRO DX (ICD9)  
015.24 TB OF KNEE-CULT DX (ICD9)  
015.25 TB OF KNEE-HISTO DX (ICD9)  
015.26 TB OF KNEE-OTH TEST (ICD9)  
015.50 TB OF LIMB BONES-UNSPEC (ICD9)  
015.51 TB LIMB BONES-NO EXAM (ICD9)  
015.52 TB LIMB BONES-EXAM UNKN (ICD9)  
015.53 TB LIMB BONES-MICRO DX (ICD9)  
015.54 TB LIMB BONES-CULT DX (ICD9)  
015.55 TB LIMB BONES-HISTO DX (ICD9)  
015.56 TB LIMB BONES-OTH TEST (ICD9)  
015.60 TB OF MASTOID-UNSPEC (ICD9)  
015.61 TB OF MASTOID-NO EXAM (ICD9)  
015.62 TB OF MASTOID-EXAM UNKN (ICD9)  
015.63 TB OF MASTOID-MICRO DX (ICD9)  
015.64 TB OF MASTOID-CULT DX (ICD9)  
015.65 TB OF MASTOID-HISTO DX (ICD9)  
015.66 TB OF MASTOID-OTH TEST (ICD9)  
015.70 TB OF BONE NEC-UNSPEC (ICD9)  
015.71 TB OF BONE NEC-NO EXAM (ICD9)  
015.72 TB OF BONE NEC-EXAM UNKN (ICD9)  
015.73 TB OF BONE NEC-MICRO DX (ICD9)  
015.74 TB OF BONE NEC-CULT DX (ICD9)  
015.75 TB OF BONE NEC-HISTO DX (ICD9)  
015.76 TB OF BONE NEC-OTH TEST (ICD9)  
015.80 TB OF JOINT NEC-UNSPEC (ICD9)  
015.81 TB OF JOINT NEC-NO EXAM (ICD9)  
015.82 TB JOINT NEC-EXAM UNKN (ICD9)  
015.83 TB OF JOINT NEC-MICRO DX (ICD9)  
015.84 TB OF JOINT NEC-CULT DX (ICD9)  
015.85 TB OF JOINT NEC-HISTO DX (ICD9)  
015.86 TB OF JOINT NEC-OTH TEST (ICD9)  
015.90 TB BONE/JOINT NOS-UNSPEC (ICD9)  
015.91 TB BONE/JT NOS-NO EXAM (ICD9)  
015.92 TB BONE/JT NOS-EXAM UNKN (ICD9)  
015.93 TB BONE/JT NOS-MICRO DX (ICD9)  
015.94 TB BONE/JT NOS-CULT DX (ICD9)  
015.95 TB BONE/JT NOS-HISTO DX (ICD9)  
015.96 TB BONE/JT NOS-OTH TEST (ICD9)  
016.00 TB OF KIDNEY-UNSPEC (ICD9)  
016.01 TB OF KIDNEY-NO EXAM (ICD9)  
016.02 TB OF KIDNEY-EXAM UNKN (ICD9)  
016.03 TB OF KIDNEY-MICRO DX (ICD9)  
016.04 TB OF KIDNEY-CULT DX (ICD9)  
016.05 TB OF KIDNEY-HISTO DX (ICD9)  
016.06 TB OF KIDNEY-OTH TEST (ICD9)  
016.10 TB OF BLADDER-UNSPEC (ICD9)  
016.11 TB OF BLADDER-NO EXAM (ICD9)

016.12 TB OF BLADDER-EXAM UNKN (ICD9)  
016.13 TB OF BLADDER-MICRO DX (ICD9)  
016.14 TB OF BLADDER-CULT DX (ICD9)  
016.15 TB OF BLADDER-HISTO DX (ICD9)  
016.16 TB OF BLADDER-OTH TEST (ICD9)  
016.20 TB OF URETER-UNSPEC (ICD9)  
016.21 TB OF URETER-NO EXAM (ICD9)  
016.22 TB OF URETER-EXAM UNKN (ICD9)  
016.23 TB OF URETER-MICRO DX (ICD9)  
016.24 TB OF URETER-CULT DX (ICD9)  
016.25 TB OF URETER-HISTO DX (ICD9)  
016.26 TB OF URETER-OTH TEST (ICD9)  
016.30 TB URINARY NEC-UNSPEC (ICD9)  
016.31 TB URINARY NEC-NO EXAM (ICD9)  
016.32 TB URINARY NEC-EXAM UNKN (ICD9)  
016.33 TB URINARY NEC-MICRO DX (ICD9)  
016.34 TB URINARY NEC-CULT DX (ICD9)  
016.35 TB URINARY NEC-HISTO DX (ICD9)  
016.36 TB URINARY NEC-OTH TEST (ICD9)  
016.40 TB EPIDIDYMIS-UNSPEC (ICD9)  
016.41 TB EPIDIDYMIS-NO EXAM (ICD9)  
016.42 TB EPIDIDYMIS-EXAM UNKN (ICD9)  
016.43 TB EPIDIDYMIS-MICRO DX (ICD9)  
016.44 TB EPIDIDYMIS-CULT DX (ICD9)  
016.45 TB EPIDIDYMIS-HISTO DX (ICD9)  
016.46 TB EPIDIDYMIS-OTH TEST (ICD9)  
016.50 TB MALE GENIT NEC-UNSPEC (ICD9)  
016.51 TB MALE GEN NEC-NO EXAM (ICD9)  
016.52 TB MALE GEN NEC-EX UNKN (ICD9)  
016.53 TB MALE GEN NEC-MICRO DX (ICD9)  
016.54 TB MALE GEN NEC-CULT DX (ICD9)  
016.55 TB MALE GEN NEC-HISTO DX (ICD9)  
016.56 TB MALE GEN NEC-OTH TEST (ICD9)  
016.60 TB OVARY & TUBE-UNSPEC (ICD9)  
016.61 TB OVARY & TUBE-NO EXAM (ICD9)  
016.62 TB OVARY/TUBE-EXAM UNKN (ICD9)  
016.63 TB OVARY & TUBE-MICRO DX (ICD9)  
016.64 TB OVARY & TUBE-CULT DX (ICD9)  
016.65 TB OVARY & TUBE-HISTO DX (ICD9)  
016.66 TB OVARY & TUBE-OTH TEST (ICD9)  
016.70 TB FEMALE GEN NEC-UNSPEC (ICD9)  
016.71 TB FEM GEN NEC-NO EXAM (ICD9)  
016.72 TB FEM GEN NEC-EXAM UNKN (ICD9)  
016.73 TB FEM GEN NEC-MICRO DX (ICD9)  
016.74 TB FEM GEN NEC-CULT DX (ICD9)  
016.75 TB FEM GEN NEC-HISTO DX (ICD9)  
016.76 TB FEM GEN NEC-OTH TEST (ICD9)  
016.90 GU TB NOS-UNSPEC (ICD9)  
016.91 GU TB NOS-NO EXAM (ICD9)  
016.92 GU TB NOS-EXAM UNKN (ICD9)  
016.93 GU TB NOS-MICRO DX (ICD9)  
016.94 GU TB NOS-CULT DX (ICD9)  
016.95 GU TB NOS-HISTO DX (ICD9)  
016.96 GU TB NOS-OTH TEST (ICD9)  
017.00 TB SKIN/SUBCUTAN-UNSPEC (ICD9)  
017.01 TB SKIN/SUBCUT-NO EXAM (ICD9)  
017.02 TB SKIN/SUBCUT-EXAM UNKN (ICD9)  
017.03 TB SKIN/SUBCUT-MICRO DX (ICD9)  
017.04 TB SKIN/SUBCUT-CULT DX (ICD9)  
017.05 TB SKIN/SUBCUT-HISTO DX (ICD9)



017.06 TB SKIN/SUBCUT-OTH TEST (ICD9)  
017.10 ERYTHEMA NODOS TB-UNSPEC (ICD9)  
017.11 ERYTHEM NODOS TB-NO EXAM (ICD9)  
017.12 ERYTHEM NOD TB-EXAM UNKN (ICD9)  
017.13 ERYTHEM NOD TB-MICRO DX (ICD9)  
017.14 ERYTHEM NODOS TB-CULT DX (ICD9)  
017.15 ERYTHEM NOD TB-HISTO DX (ICD9)  
017.16 ERYTHEM NOD TB-OTH TEST (ICD9)  
017.20 TB PERIPH LYMPH-UNSPEC (ICD9)  
017.21 TB PERIPH LYMPH-NO EXAM (ICD9)  
017.22 TB PERIPH LYMPH-EXAM UNK (ICD9)  
017.23 TB PERIPH LYMPH-MICRO DX (ICD9)  
017.24 TB PERIPH LYMPH-CULT DX (ICD9)  
017.25 TB PERIPH LYMPH-HISTO DX (ICD9)  
017.26 TB PERIPH LYMPH-OTH TEST (ICD9)  
017.30 TB OF EYE-UNSPEC (ICD9)  
017.31 TB OF EYE-NO EXAM (ICD9)  
017.32 TB OF EYE-EXAM UNKN (ICD9)  
017.33 TB OF EYE-MICRO DX (ICD9)  
017.34 TB OF EYE-CULT DX (ICD9)  
017.35 TB OF EYE-HISTO DX (ICD9)  
017.36 TB OF EYE-OTH TEST (ICD9)  
017.40 TB OF EAR-UNSPEC (ICD9)  
017.41 TB OF EAR-NO EXAM (ICD9)  
017.42 TB OF EAR-EXAM UNKN (ICD9)  
017.43 TB OF EAR-MICRO DX (ICD9)  
017.44 TB OF EAR-CULT DX (ICD9)  
017.45 TB OF EAR-HISTO DX (ICD9)  
017.46 TB OF EAR-OTH TEST (ICD9)  
017.50 TB OF THYROID-UNSPEC (ICD9)  
017.51 TB OF THYROID-NO EXAM (ICD9)  
017.52 TB OF THYROID-EXAM UNKN (ICD9)  
017.53 TB OF THYROID-MICRO DX (ICD9)  
017.54 TB OF THYROID-CULT DX (ICD9)  
017.55 TB OF THYROID-HISTO DX (ICD9)  
017.56 TB OF THYROID-OTH TEST (ICD9)  
017.60 TB OF ADRENAL-UNSPEC (ICD9)  
017.61 TB OF ADRENAL-NO EXAM (ICD9)  
017.62 TB OF ADRENAL-EXAM UNKN (ICD9)  
017.63 TB OF ADRENAL-MICRO DX (ICD9)  
017.64 TB OF ADRENAL-CULT DX (ICD9)  
017.65 TB OF ADRENAL-HISTO DX (ICD9)  
017.66 TB OF ADRENAL-OTH TEST (ICD9)  
017.70 TB OF SPLEEN-UNSPEC (ICD9)  
017.71 TB OF SPLEEN-NO EXAM (ICD9)  
017.72 TB OF SPLEEN-EXAM UNKN (ICD9)  
017.73 TB OF SPLEEN-MICRO DX (ICD9)  
017.74 TB OF SPLEEN-CULT DX (ICD9)  
017.75 TB OF SPLEEN-HISTO DX (ICD9)  
017.76 TB OF SPLEEN-OTH TEST (ICD9)  
017.80 TB ESOPHAGUS-UNSPEC (ICD9)  
017.81 TB ESOPHAGUS-NO EXAM (ICD9)  
017.82 TB ESOPHAGUS-EXAM UNKN (ICD9)  
017.83 TB ESOPHAGUS-MICRO DX (ICD9)  
017.84 TB ESOPHAGUS-CULT DX (ICD9)  
017.85 TB ESOPHAGUS-HISTO DX (ICD9)  
017.86 TB ESOPHAGUS-OTH TEST (ICD9)  
017.90 TB OF ORGAN NEC-UNSPEC (ICD9)  
017.91 TB OF ORGAN NEC-NO EXAM (ICD9)  
017.92 TB ORGAN NEC-EXAM UNKN (ICD9)

017.93 TB OF ORGAN NEC-MICRO DX (ICD9)  
 017.94 TB OF ORGAN NEC-CULT DX (ICD9)  
 017.95 TB OF ORGAN NEC-HISTO DX (ICD9)  
 017.96 TB OF ORGAN NEC-OTH TEST (ICD9)  
 018.00 ACUTE MILIARY TB-UNSPEC (ICD9)  
 018.01 ACUTE MILIARY TB-NO EXAM (ICD9)  
 018.02 AC MILIARY TB-EXAM UNKN (ICD9)  
 018.03 AC MILIARY TB-MICRO DX (ICD9)  
 018.04 ACUTE MILIARY TB-CULT DX (ICD9)  
 018.05 AC MILIARY TB-HISTO DX (ICD9)  
 018.06 AC MILIARY TB-OTH TEST (ICD9)  
 018.80 MILIARY TB NEC-UNSPEC (ICD9)  
 018.81 MILIARY TB NEC-NO EXAM (ICD9)  
 018.82 MILIARY TB NEC-EXAM UNKN (ICD9)  
 018.83 MILIARY TB NEC-MICRO DX (ICD9)  
 018.84 MILIARY TB NEC-CULT DX (ICD9)  
 018.85 MILIARY TB NEC-HISTO DX (ICD9)  
 018.86 MILIARY TB NEC-OTH TEST (ICD9)  
 018.90 MILIARY TB NOS-UNSPEC (ICD9)  
 018.91 MILIARY TB NOS-NO EXAM (ICD9)  
 018.92 MILIARY TB NOS-EXAM UNKN (ICD9)  
 018.93 MILIARY TB NOS-MICRO DX (ICD9)  
 018.94 MILIARY TB NOS-CULT DX (ICD9)  
 018.95 MILIARY TB NOS-HISTO DX (ICD9)  
 018.96 MILIARY TB NOS-OTH TEST (ICD9)  
 020.0 BUBONIC PLAGUE (ICD9)  
 020.1 CELLULOCUTANEOUS PLAGUE (ICD9)  
 020.2 SEPTICEMIC PLAGUE (ICD9)  
 020.3 PRIMARY PNEUMONIC PLAGUE (ICD9)  
 020.4 SECONDARY PNEUMON PLAGUE (ICD9)  
 020.5 PNEUMONIC PLAGUE NOS (ICD9)  
 020.8 OTHER TYPES OF PLAGUE (ICD9)  
 020.9 PLAGUE NOS (ICD9)  
 021.0 ULCEROGLANDUL TULAREMIA (ICD9)  
 021.1 ENTERIC TULAREMIA (ICD9)  
 021.2 PULMONARY TULAREMIA (ICD9)  
 021.3 OCULOGLANDULAR TULAREMIA (ICD9)  
 021.8 TULAREMIA NEC (ICD9)  
 021.9 TULAREMIA NOS (ICD9)  
 022.0 CUTANEOUS ANTHRAX (ICD9)  
 022.1 PULMONARY ANTHRAX (ICD9)  
 022.2 GASTROINTESTINAL ANTHRAX (ICD9)  
 022.3 ANTHRAX SEPTICEMIA (ICD9)  
 022.8 OTHER ANTHRAX MANIFEST (ICD9)  
 022.9 ANTHRAX NOS (ICD9)  
 023.0 BRUCELLA MELITENSIS (ICD9)  
 023.1 BRUCELLA ABORTUS (ICD9)  
 023.2 BRUCELLA SUIS (ICD9)  
 023.3 BRUCELLA CANIS (ICD9)  
 023.8 BRUCellosIS NEC (ICD9)  
 023.9 BRUCellosIS NOS (ICD9)  
 024 GLANDERS (ICD9)  
 025 MELIOIDOSIS (ICD9)  
 026.0 SPIRILLARY FEVER (ICD9)  
 026.1 STREPTOBACILLARY FEVER (ICD9)  
 026.9 RAT-BITE FEVER NOS (ICD9)  
 027.0 LISTERIOSIS (ICD9)  
 027.1 ERYSIPELOTHRIX INFECTION (ICD9)  
 027.2 PASTEURELLOSIS (ICD9)  
 027.8 ZOONOTIC BACT DIS NEC (ICD9)

027.9 ZOONOTIC BACT DIS NOS (ICD9)  
 030.0 LEPROMATOUS LEPROSY (ICD9)  
 030.1 TUBERCULOID LEPROSY (ICD9)  
 030.2 INDETERMINATE LEPROSY (ICD9)  
 030.3 BORDERLINE LEPROSY (ICD9)  
 030.8 LEPROSY NEC (ICD9)  
 030.9 LEPROSY NOS (ICD9)  
 031.0 PULMONARY MYCOBACTERIA (ICD9)  
 031.1 CUTANEOUS MYCOBACTERIA (ICD9)  
 031.2 DX DUE TO DISSEM MYCOBACT (Begin 1997) (ICD9)  
 031.8 MYCOBACTERIAL DIS NEC (ICD9)  
 031.9 MYCOBACTERIAL DIS NOS (ICD9)  
 032.0 FAUCIAL DIPHThERIA (ICD9)  
 032.1 NASOPHARYNX DIPHThERIA (ICD9)  
 032.2 ANT NASAL DIPHThERIA (ICD9)  
 032.3 LARYNGEAL DIPHThERIA (ICD9)  
 032.81 CONJUNCTIVAL DIPHThERIA (ICD9)  
 032.83 DIPHThERITIC PERITONITIS (ICD9)  
 032.84 DIPHThERITIC CYSTITIS (ICD9)  
 032.85 CUTANEOUS DIPHThERIA (ICD9)  
 032.89 DIPHThERIA NEC (ICD9)  
 032.9 DIPHThERIA NOS (ICD9)  
 033.0 BORDETELLA PERTUSSIS (ICD9)  
 033.1 BORDETELLA PARAPERTUSSIS (ICD9)  
 033.8 WHOOPING COUGH NEC (ICD9)  
 033.9 WHOOPING COUGH NOS (ICD9)  
 034.0 STREP SORE THROAT (ICD9)  
 034.1 SCARLET FEVER (ICD9)  
 035 ERYSIPELAS (ICD9)  
 036.0 MENINGOCOCCAL MENINGITIS (ICD9)  
 036.1 MENINGOCOCC ENCEPHALITIS (ICD9)  
 036.2 MENINGOCOCCEMIA (ICD9)  
 036.3 MENINGOCOCC ADRENAL SYND (ICD9)  
 036.40 MENINGOCOCCAL CARDITIS UNSPECIFIED  
 036.41 MENINGOCOCCAL PERICARDITIS  
 036.42 MENINGOCOCCAL ENDOCARDITIS  
 036.43 MENINGOCOCCAL MYOCARDITIS  
 036.81 MENINGOCOCC OPTIC NEURIT (ICD9)  
 036.82 MENINGOCOCC ARTHROPATHY (ICD9)  
 036.89 MENINGOCOCCAL INFECT NEC (ICD9)  
 036.9 MENINGOCOCCAL INFECT NOS (ICD9)  
 037 TETANUS (ICD9)  
 038.0 STREPTOCOCCAL SEPTICEMIA (ICD9)  
 038.1 STAPHYLOCOCC SEPTICEMIA (End 1997) (ICD9)  
 038.10 STAPH SEPTICEMIA- UNSPEC (Begin 1997) (ICD9)  
 038.11 STAPH AUREUS SEPTICEMIA (Begin 1997) (ICD9)  
 038.12 (no description found)  
 038.19 OT STAPH SEPTICEMIA (Begin 1997) (ICD9)  
 038.2 PNEUMOCOCCAL SEPTICEMIA (ICD9)  
 038.3 ANAEROBIC SEPTICEMIA (ICD9)  
 038.40 GRAM-NEG SEPTICEMIA NOS (ICD9)  
 038.41 H. INFLUENAE SEPTICEMIA (ICD9)  
 038.42 E COLI SEPTICEMIA (ICD9)  
 038.43 PSEUDOMONAS SEPTICEMIA (ICD9)  
 038.44 SERRATIA SEPTICEMIA (ICD9)  
 038.49 GRAM-NEG SEPTICEMIA NEC (ICD9)  
 038.8 SEPTICEMIA NEC (ICD9)  
 038.9 SEPTICEMIA NOS (ICD9)  
 039.0 CUTANEOUS ACTINOMYCOSIS (ICD9)  
 039.1 PULMONARY ACTINOMYCOSIS (ICD9)

039.2 ABDOMINAL ACTINOMYCOSIS (ICD9)  
 039.3 CERVICOFAC ACTINOMYCOSIS (ICD9)  
 039.4 MADURA FOOT (ICD9)  
 039.8 ACTINOMYCOSIS NEC (ICD9)  
 039.9 ACTINOMYCOSIS NOS (ICD9)  
 040.0 GAS GANGRENE (ICD9)  
 040.1 RHINOSCLEROMA (ICD9)  
 040.2 WHIPPLE-S DISEASE (ICD9)  
 040.3 NECROBACILLOSIS (ICD9)  
 040.41 INFANT BOTULISM (ICD9)  
 040.42 WOUND BOTULISM (Begin 2007) (ICD9)  
 040.81 TROPICAL PYOMYOSITIS (ICD9)  
 040.82 TOXIC SHOCK SYNDROME (Begin 2002) (ICD9)  
 040.89 BACTERIAL DISEASES NEC (ICD9)  
 041.0 STREPTOCOCCUS INFECT NOS (Begin 1980 (ICD9)  
 041.00 STREPTOCOCCUS UNSPEC (Begin 1992) (ICD9)  
 041.01 GROUP A STREPTOCOCCUS (Begin 1992) (ICD9)  
 041.02 GROUP B STREPTOCOCCUS (Begin 1992) (ICD9)  
 041.03 GROUP C STREPTOCOCCUS (Begin 1992) (ICD9)  
 041.04 GROUP D STREPTOCOCCUS (Begin 1992) (ICD9)  
 041.05 GROUP G STREPTOCOCCUS (Begin 1992) (ICD9)  
 041.09 OTHER STREPTOCOCCUS (Begin 1992) (ICD9)  
 041.1 STAPH INFECTION NOS (Begin 1980 (ICD9)  
 041.10 STAPH UNSPEC (Begin 1992) (ICD9)  
 041.11 STAPH AUREUS (Begin 1992) (ICD9)  
 041.12 (no description found)  
 041.19 OTHER STAPH (Begin 1992) (ICD9)  
 041.2 PNEUMOCOCCUS INFECT NOS (ICD9)  
 041.3 KLEBSIELLA INFECT NOS (ICD9)  
 041.4 E. COLI INFECT NOS (ICD9)  
 041.5 H. INFLUENZAE INFECT NOS (ICD9)  
 041.6 PROTEUS INFECTION NOS (ICD9)  
 041.7 PSEUDOMONAS INFECT NOS (ICD9)  
 041.8 BACTERIAL INFECTION NEC (Begin 1980 (ICD9)  
 041.81 MYCOPLASMA (Begin 1992) (ICD9)  
 041.82 BACILLUS FRAGILIS (Begin 1992) (ICD9)  
 041.83 CLOSTRID PERFRINGENS (Begin 1992) (ICD9)  
 041.84 OTHER ANAEROBES (Begin 1992) (ICD9)  
 041.85 OTHER GRAM NEG ORGS (Begin 1992) (ICD9)  
 041.86 HELICOBACTER PYLORI INFECTION (Begin 1995) (ICD9)  
 041.89 OTHER SPEC BACTERIA (Begin 1992) (ICD9)  
 041.9 BACTERIAL INFECTION NOS (ICD9)  
 042 HIV DISEASE (Begin 1994) (ICD9)  
 042.0 HIV W/SPECIF INFECTIONS (Begin 1986 (ICD9)  
 042.1 HIV CAUS OTH SPEC INFECT (Begin 1986 (ICD9)  
 042.2 HIV W/SPEC MALIG NEOPLSM (Begin 1986 (ICD9)  
 042.9 AIDS- UNSPECIFIED (Begin 1986 (ICD9)  
 043.0 HIV CAUS LYMPHADENOPATHY (Begin 1986 (ICD9)  
 043.1 HIV CAUS SP CNS DISEASE (Begin 1986 (ICD9)  
 043.2 HIV CAUS OT DISOR IMMUNE (Begin 1986 (ICD9)  
 043.3 HIV CAUS OTH SPECIF COND (Begin 1986 (ICD9)  
 043.9 ARC- UNSPECIFIED (Begin 1986 (ICD9)  
 044.0 HIV CAUS ACUTE INFECTION (Begin 1986 (ICD9)  
 044.9 HIV- UNSPECIFIED (Begin 1986 (ICD9)  
 045.00 AC BULBAR POLIO-TYPE NOS (ICD9)  
 045.01 AC BULBAR POLIO-TYPE 1 (ICD9)  
 045.02 AC BULBAR POLIO-TYPE 2 (ICD9)  
 045.03 AC BULBAR POLIO-TYPE 3 (ICD9)  
 045.10 PARAL POLIO NEC-TYPE NOS (ICD9)  
 045.11 PARAL POLIO NEC-TYPE 1 (ICD9)

045.12 PARAL POLIO NEC-TYPE 2 (ICD9)  
 045.13 PARAL POLIO NEC-TYPE 3 (ICD9)  
 045.20 NONPARALY POLIO-TYPE NOS (ICD9)  
 045.21 NONPARALYT POLIO-TYPE 1 (ICD9)  
 045.22 NONPARALYT POLIO-TYPE 2 (ICD9)  
 045.23 NONPARALYT POLIO-TYPE 3 (ICD9)  
 045.90 AC POLIO NOS-TYPE NOS (ICD9)  
 045.91 AC POLIO NOS-TYPE 1 (ICD9)  
 045.92 AC POLIO NOS-TYPE 2 (ICD9)  
 045.93 AC POLIO NOS-TYPE 3 (ICD9)  
 046.0 KURU (ICD9)  
 046.1 JAKOB-CREUTZFELDT DIS (ICD9)  
 046.11 (no description found)  
 046.19 (no description found)  
 046.3 PROG MULTIFOC LEUKOENCEP (ICD9)  
 046.71 (no description found)  
 046.72 (no description found)  
 046.79 (no description found)  
 046.8 CNS SLOW VIRUS INFEC NEC (ICD9)  
 046.9 CNS SLOW VIRUS INFEC NOS (ICD9)  
 047.0 COXSACKIE VIRUS MENING (ICD9)  
 047.1 ECHO VIRUS MENINGITIS (ICD9)  
 047.8 VIRAL MENINGITIS NEC (ICD9)  
 047.9 VIRAL MENINGITIS NOS (ICD9)  
 048 OTH ENTEROVIRAL CNS DIS (ICD9)  
 049.0 LYMPHOCYTIC CHORIOMENING (ICD9)  
 049.1 ADENOVIRAL MENINGITIS (ICD9)  
 049.8 VIRAL ENCEPHALITIS NEC (ICD9)  
 049.9 VIRAL ENCEPHALITIS NOS (ICD9)  
 050.0 VARIOLA MAJOR (ICD9)  
 050.1 ALASTRIM (ICD9)  
 050.2 MODIFIED SMALLPOX (ICD9)  
 050.9 SMALLPOX NOS (ICD9)  
 051.0 COWPOX (ICD9)  
 051.01 (no description found)  
 051.02 (no description found)  
 051.1 PSEUDOCOWPOX (ICD9)  
 051.2 CONTAGIOUS PUSTULAR DERM (ICD9)  
 051.9 PARAVACCINIA NOS (ICD9)  
 052.0 POSTVARICELLA ENCEPHALIT (ICD9)  
 052.1 VARICELLA PNEUMONITIS (ICD9)  
 052.2 POSTVARICELLA MYELITIS (Begin 2006) (ICD9)  
 052.7 VARICELLA COMPLICAT NEC (ICD9)  
 052.8 VARICELLA COMPLICAT NOS (ICD9)  
 052.9 VARICELLA UNCOMPLICATED (ICD9)  
 053.0 HERPES ZOSTER MENINGITIS (ICD9)  
 053.10 H ZOSTER NERV SYST NOS (ICD9)  
 053.11 GENICULATE HERPES ZOSTER (ICD9)  
 053.12 POSTHERPES TRIGEM NEURAL (ICD9)  
 053.13 POSTHERPES POLYNEUROPATH (ICD9)  
 053.14 HERPES ZOSTER MYELITIS (Begin 2006) (ICD9)  
 053.19 H ZOSTER NERV SYST NEC (ICD9)  
 053.20 HERPES ZOSTER OF EYELID (ICD9)  
 053.21 H ZOSTER KERATOCONJUNCT (ICD9)  
 053.22 H ZOSTER IRIDOCYCLITIS (ICD9)  
 053.29 HERPES ZOSTER OF EYE NEC (ICD9)  
 053.71 H ZOSTER OTITIS EXTERNA (ICD9)  
 053.79 H ZOSTER COMPLICATED NEC (ICD9)  
 053.8 H ZOSTER COMPLICATED NOS (ICD9)  
 053.9 HERPES ZOSTER NOS (ICD9)

054.0 ECZEMA HERPETICUM (ICD9)  
 054.10 GENITAL HERPES NOS (ICD9)  
 054.11 HERPETIC VULVOVAGINITIS (ICD9)  
 054.12 HERPETIC ULCER OF VULVA (ICD9)  
 054.13 HERPETIC INFECT OF PENIS (ICD9)  
 054.19 GENITAL HERPES NEC (ICD9)  
 054.2 HERPETIC GINGIVOSTOMAT (ICD9)  
 054.3 HERPETIC ENCEPHALITIS (ICD9)  
 054.40 HERPES SIMPLEX EYE NOS (ICD9)  
 054.41 HERPES SIMPLEX OF EYELID (ICD9)  
 054.42 DENDRITIC KERATITIS (ICD9)  
 054.43 H SIMPLEX KERATITIS (ICD9)  
 054.44 H SIMPLEX IRIDOCYCLITIS (ICD9)  
 054.49 HERPES SIMPLEX EYE NEC (ICD9)  
 054.5 HERPETIC SEPTICEMIA (ICD9)  
 054.6 HERPETIC WHITLOW (ICD9)  
 054.71 VISCERAL HERPES SIMPLEX (ICD9)  
 054.72 H SIMPLEX MENINGITIS (ICD9)  
 054.73 H SIMPLEX OTITIS EXTERNA (ICD9)  
 054.74 HERPES SIMPLEX MYELITIS (Begin 2006) (ICD9)  
 054.79 H SIMPLEX COMPLICAT NEC (ICD9)  
 054.8 H SIMPLEX COMPLICAT NOS (ICD9)  
 054.9 HERPES SIMPLEX NOS (ICD9)  
 055.0 POSTMEASLES ENCEPHALITIS (ICD9)  
 055.1 POSTMEASLES PNEUMONIA (ICD9)  
 055.2 POSTMEASLES OTITIS MEDIA (ICD9)  
 055.71 MEASLES KERATITIS (ICD9)  
 055.79 MEASLES COMPLICATION NEC (ICD9)  
 055.8 MEASLES COMPLICATION NOS (ICD9)  
 055.9 MEASLES UNCOMPLICATED (ICD9)  
 056.00 RUBELLA NERVE COMPL NOS (ICD9)  
 056.01 RUBELLA ENCEPHALITIS (ICD9)  
 056.09 RUBELLA NERVE COMPL NEC (ICD9)  
 056.71 ARTHRITIS DUE TO RUBELLA (ICD9)  
 056.79 RUBELLA COMPLICATION NEC (ICD9)  
 056.8 RUBELLA COMPLICATION NOS (ICD9)  
 056.9 RUBELLA UNCOMPLICATED (ICD9)  
 057.0 ERYTHEMA INFECTIOSUM (ICD9)  
 057.8 VIRAL EXANTHEMATA NEC (ICD9)  
 057.9 VIRAL EXANTHEMATA NOS (ICD9)  
 058.10 ROSEOLA INFANTUM NOS (Begin 2007) (ICD9)  
 058.11 ROSEOLA INFANT D/T HHV-6 (Begin 2007) (ICD9)  
 058.12 ROSEOLA INFANT D/T HHV-7 (Begin 2007) (ICD9)  
 058.21 HUMAN HERPESVIR 6 ENCEPH (Begin 2007) (ICD9)  
 058.29 HUMAN HERPESVR ENCPH NEC (Begin 2007) (ICD9)  
 058.81 HUMAN HERPESVIRUS 6 INFC (Begin 2007) (ICD9)  
 058.82 HUMAN HERPESVIRUS 7 INFC (Begin 2007) (ICD9)  
 058.89 HUMAN HERPESVIRS INF NEC (Begin 2007) (ICD9)  
 059.00 ORTHOPOXVIRUS INFECTION, UNSPECIFIED  
 059.01 MONKEYPOX  
 059.09 OTHER ORTHOPOXVIRUS INFECTIONS  
 059.10 PARAPOXVIRUS INFECTION, UNSPECIFIED  
 059.11 BOVINE STOMATITIS  
 059.12 SEALPOX  
 059.19 OTHER PARAPOXVIRUS INFECTIONS  
 059.20 YATAPOXVIRUS INFECTION, UNSPECIFIED  
 059.21 TANAPOX  
 059.22 YABA MONKEY TUMOR VIRUS  
 059.8 OTHER POXVIRUS INFECTIONS  
 059.9 POXVIRUS INFECTIONS, UNSPECIFIED

060.0 SYLVATIC YELLOW FEVER (ICD9)  
 060.1 URBAN YELLOW FEVER (ICD9)  
 060.9 YELLOW FEVER NOS (ICD9)  
 061 DENGUE (ICD9)  
 062.0 JAPANESE ENCEPHALITIS (ICD9)  
 062.1 WEST EQUINE ENCEPHALITIS (ICD9)  
 062.2 EAST EQUINE ENCEPHALITIS (ICD9)  
 062.3 ST LOUIS ENCEPHALITIS (ICD9)  
 062.4 AUSTRALIAN ENCEPHALITIS (ICD9)  
 062.5 CALIFORNIA ENCEPHALITIS (ICD9)  
 062.8 MOSQUIT-BORNE ENCEPH NEC (ICD9)  
 062.9 MOSQUIT-BORNE ENCEPH NOS (ICD9)  
 063.0 RUSSIA SPR-SUMMER ENCEPH (ICD9)  
 063.1 LOUPING ILL (ICD9)  
 063.2 CENT EUROPE ENCEPHALITIS (ICD9)  
 063.8 TICK-BORNE ENCEPH NEC (ICD9)  
 063.9 TICK-BORNE ENCEPH NOS (ICD9)  
 064 VIR ENCEPH ARTHROPOD NEC (ICD9)  
 065.0 CRIMEAN HEMORRHAGIC FEV (ICD9)  
 065.1 OMSK HEMORRHAGIC FEVER (ICD9)  
 065.2 KYASANUR FOREST DISEASE (ICD9)  
 065.3 TICK-BORNE HEM FEVER NEC (ICD9)  
 065.4 MOSQUITO-BORNE HEM FEVER (ICD9)  
 065.8 ARTHROPOD HEM FEVER NEC (ICD9)  
 065.9 ARTHROPOD HEM FEVER NOS (ICD9)  
 066.0 PHLEBOTOMUS FEVER (ICD9)  
 066.1 TICK-BORNE FEVER (ICD9)  
 066.2 VENEZUELAN EQUINE FEVER (ICD9)  
 066.3 MOSQUITO-BORNE FEVER NEC (ICD9)  
 066.4 WEST NILE FEVER (Begin 2002 (ICD9)  
 066.40 WEST NILE FEVER NOS (Begin 2004) (ICD9)  
 066.41 WEST NILE FEVER W/ENCEPH (Begin 2004) (ICD9)  
 066.42 WEST NILE NEURO MAN NEC (Begin 2004) (ICD9)  
 066.49 WEST NILE W COMPLIC NEC (Begin 2004) (ICD9)  
 066.8 ARTHROPOD VIRUS NEC (ICD9)  
 066.9 ARTHROPOD VIRUS NOS (ICD9)  
 070.0 HEPATITIS A WITH COMA (ICD9)  
 070.1 HEPATITIS A W/O COMA (ICD9)  
 070.2 HEPATITIS B WITH COMA (Begin 1980 (ICD9)  
 070.20 VRL HEPAT B CM W/O DELTA (Begin 1991) (ICD9)  
 070.21 VRL HEPAT B CM W DELTA (Begin 1991) (ICD9)  
 070.22 CHR HEPAT COMA W/O DELTA (Begin 1994) (ICD9)  
 070.23 CHR HEPAT COMA W/ DELTA (Begin 1994) (ICD9)  
 070.3 HEPATITIS B W/O COMA (Begin 1980 (ICD9)  
 070.30 VRL HPT B W/O CM W/O DLT (Begin 1991) (ICD9)  
 070.31 VRL HPT B W/O CM W DELTA (Begin 1991) (ICD9)  
 070.32 CHR HEPAT W/O COMA W/O DELTA (Begin 1994) (ICD9)  
 070.33 CHR HEPAT W/O COMA W/ DELTA (Begin 1994) (ICD9)  
 070.4 VIRAL HEPAT NEC W COMA (Begin 1980 (ICD9)  
 070.41 SPF VRL HPT CM HPT C (Begin 1991) (ICD9)  
 070.42 SPF VRL HPT CM DLT W/O B (Begin 1991) (ICD9)  
 070.43 SPF VRL HPT CM HPT E (Begin 1991) (ICD9)  
 070.44 CHR HEPAT C W/ COMA (Begin 1994) (ICD9)  
 070.49 SPF VRL HPT CM (Begin 1991) (ICD9)  
 070.5 VIRAL HEPAT NEC W/O COMA (Begin 1980 (ICD9)  
 070.51 VRL HPT W/O CM HEPAT C (Begin 1991) (ICD9)  
 070.52 VRL HPT W/O CM DLT W/O B (Begin 1991) (ICD9)  
 070.53 VRL HPT W/O CM HEPAT E (Begin 1991) (ICD9)  
 070.54 CHR HEPAT C W/O COMA (Begin 1994) (ICD9)  
 070.59 VRL HPT W/O CM (Begin 1991) (ICD9)

070.6 VIRAL HEPAT NOS W COMA (ICD9)  
 070.70 HPT C W/O HEPAT COMA NOS (Begin 2004) (ICD9)  
 070.71 HPT C W HEPATIC COMA NOS (Begin 2004) (ICD9)  
 070.9 VIRAL HEPAT NOS W/O COMA (ICD9)  
 071 RABIES (ICD9)  
 072.0 MUMPS ORCHITIS (ICD9)  
 072.1 MUMPS MENINGITIS (ICD9)  
 072.2 MUMPS ENCEPHALITIS (ICD9)  
 072.3 MUMPS PANCREATITIS (ICD9)  
 072.71 MUMPS HEPATITIS (ICD9)  
 072.72 MUMPS POLYNEUROPATHY (ICD9)  
 072.79 MUMPS COMPLICATION NEC (ICD9)  
 072.8 MUMPS COMPLICATION NOS (ICD9)  
 072.9 MUMPS UNCOMPLICATED (ICD9)  
 073.0 ORNITHOSIS PNEUMONIA (ICD9)  
 073.7 ORNITHOSIS COMPLICAT NEC (ICD9)  
 073.8 ORNITHOSIS COMPLICAT NOS (ICD9)  
 073.9 ORNITHOSIS NOS (ICD9)  
 074.0 HERPANGINA (ICD9)  
 074.1 EPIDEMIC PLEURODYNIA (ICD9)  
 074.20 COXSACKIE CARDITIS UNSPECIFIED  
 074.21 COXSACKIE PERICARDITIS  
 074.22 COXSACKIE ENDOCARDITIS  
 074.23 COXSACKIE MYOCARDITIS  
 074.3 HAND- FOOT & MOUTH DIS (ICD9)  
 074.8 COXSACKIE VIRUS NEC (ICD9)  
 075 INFECTIOUS MONONUCLEOSIS (ICD9)  
 076.0 TRACHOMA- INITIAL STAGE (ICD9)  
 076.1 TRACHOMA- ACTIVE STAGE (ICD9)  
 076.9 TRACHOMA NOS (ICD9)  
 077.0 INCLUSION CONJUNCTIVITIS (ICD9)  
 077.1 EPIDEM KERATOCONJUNCTIV (ICD9)  
 077.2 PHARYNGOCONJUNCT FEVER (ICD9)  
 077.3 ADENOVIRAL CONJUNCT NEC (ICD9)  
 077.4 EPIDEM HEM CONJUNCTIVIT (ICD9)  
 077.8 VIRAL CONJUNCTIVITIS NEC (ICD9)  
 077.9 VIRAL AND CHLAMYDIAL CONJUNCTIVITIS NOS (End 1993) (ICD9)  
 077.98 DIS OF CONJUNCT DUE TO CHLAMYDIAE (Begin 1993) (ICD9)  
 077.99 DIS OF CONJUNCT DUE TO VIRUSES (Begin 1993) (ICD9)  
 078.0 MOLLUSCUM CONTAGIOSUM (ICD9)  
 078.1 VIRAL WARTS (End 1993) (ICD9)  
 078.10 VIRAL WARTS UNSPEC (Begin 1993) (ICD9)  
 078.11 CONDYLOMA ACCUMINATUM (Begin 1993) (ICD9)  
 078.12 (no description found)  
 078.19 OTHER SPEC VIRAL WARTS (Begin 1993) (ICD9)  
 078.2 SWEATING FEVER (ICD9)  
 078.3 CAT-SCRATCH DISEASE (ICD9)  
 078.4 FOOT & MOUTH DISEASE (ICD9)  
 078.5 CYTOMEGAL INCLUSION DIS (ICD9)  
 078.6 HEM NEPHROSONEPHRITIS (ICD9)  
 078.7 ARENAVIRAL HEM FEVER (ICD9)  
 078.81 EPIDEMIC VERTIGO (ICD9)  
 078.82 EPIDEMIC VOMITING SYND (ICD9)  
 078.88 OTH SPEC DISEASE DUE TO CHLAMYDIAE (Begin 1993) (ICD9)  
 078.89 VIRAL DISEASE NEC (ICD9)  
 079.0 ADENOVIRUS INFECT NOS (ICD9)  
 079.1 ECHO VIRUS INFECT NOS (ICD9)  
 079.2 COXSACKIE VIRUS INF NOS (ICD9)  
 079.3 RHINOVIRUS INFECT NOS (ICD9)  
 079.4 HUMAN PAPILLOMA VIRUS (Begin 1993) (ICD9)



079.50 UNSPEC RETROVIRUS (Begin 1993) (ICD9)  
 079.51 HTLV TYPE I (Begin 1993) (ICD9)  
 079.52 HTLV TYPE II (Begin 1993) (ICD9)  
 079.53 HIV TYPE 2 (Begin 1993) (ICD9)  
 079.59 OTH SPEC RETROVIRUS (Begin 1993) (ICD9)  
 079.6 RESPIR SYNCITIAL VIRUS (Begin 1996) (ICD9)  
 079.8 VIRAL AND CHLAMYDIAL INFECTION NEC (End 1993) (ICD9)  
 079.81 HANTAVIRUS INFECTION (Begin 1995) (ICD9)  
 079.82 SARS-ASSOCIATED CORONAVIRUS (Begin 2003) (ICD9)  
 079.83 PARVOVIRUS B19 (Begin 2007) (ICD9)  
 079.88 OTH SPEC CHLAMYDIAL INFECTION (Begin 1993) (ICD9)  
 079.89 OTH SPEC VIRAL INFECTION (Begin 1993) (ICD9)  
 079.9 VIRAL AND CHLAMYDIAL INFECTION NOS (End 1993) (ICD9)  
 079.98 CHLAMYDIAL INFECTION NOS (Begin 1993) (ICD9)  
 079.99 VIRAL INFECTION NOS (Begin 1993) (ICD9)  
 080 LOUSE-BORNE TYPHUS (ICD9)  
 081.0 MURINE TYPHUS (ICD9)  
 081.1 BRILL-S DISEASE (ICD9)  
 081.2 SCRUB TYPHUS (ICD9)  
 081.9 TYPHUS NOS (ICD9)  
 082.0 SPOTTED FEVERS (ICD9)  
 082.1 BOUTONNEUSE FEVER (ICD9)  
 082.2 NORTH ASIAN TICK FEVER (ICD9)  
 082.3 QUEENSLAND TICK TYPHUS (ICD9)  
 082.40 EHRlichiosis- UNSPECIFIED (Begin 2000) (ICD9)  
 082.41 EHRlichiosis CHAFEENSIS (Begin 2000) (ICD9)  
 082.49 OTHER EHRlichiosis (Begin 2000) (ICD9)  
 082.8 TICK-BORNE RICKETTS NEC (ICD9)  
 082.9 TICK-BORNE RICKETTS NOS (ICD9)  
 083.0 Q FEVER (ICD9)  
 083.1 TRENCH FEVER (ICD9)  
 083.2 RICKETTSIALPOX (ICD9)  
 083.8 RICKETTSIOSES NEC (ICD9)  
 083.9 RICKETTSIOSIS NOS (ICD9)  
 084.0 FALCIPARUM MALARIA (ICD9)  
 084.1 VIVAX MALARIA (ICD9)  
 084.2 QUARTAN MALARIA (ICD9)  
 084.3 OVALE MALARIA (ICD9)  
 084.4 MALARIA NEC (ICD9)  
 084.5 MIXED MALARIA (ICD9)  
 084.6 MALARIA NOS (ICD9)  
 084.7 INDUCED MALARIA (ICD9)  
 084.8 BLACKWATER FEVER (ICD9)  
 084.9 MALARIA COMPLICATED NEC (ICD9)  
 085.0 VISCERAL LEISHMANIASIS (ICD9)  
 085.1 CUTAN LEISHMANIAS URBAN (ICD9)  
 085.2 CUTAN LEISHMANIAS ASIAN (ICD9)  
 085.3 CUTAN LEISHMANIAS ETHIOP (ICD9)  
 085.4 CUTAN LEISHMANIAS AMER (ICD9)  
 085.5 MUCOCUTAN LEISHMANIASIS (ICD9)  
 085.9 LEISHMANIASIS NOS (ICD9)  
 086.0 CHAGAS DISEASE OF HEART (ICD9)  
 086.1 CHAGAS DIS OF OTH ORGAN (ICD9)  
 086.2 CHAGAS DISEASE NOS (ICD9)  
 086.3 GAMBIAN TRYPANOSOMIASIS (ICD9)  
 086.4 RHODESIAN TRYPANOSOMIAS (ICD9)  
 086.5 AFRICAN TRYPANOSOMA NOS (ICD9)  
 086.9 TRYPANOSOMIASIS NOS (ICD9)  
 087.0 LOUSE-BORNE RELAPS FEVER (ICD9)  
 087.1 TICK-BORNE RELAPS FEVER (ICD9)

087.9 RELAPSING FEVER NOS (ICD9)  
 088.0 BARTONELLOSIS (ICD9)  
 088.8 ARTHROPOD-BORNE DIS NEC (Begin 1980 (ICD9)  
 088.81 LYME DISEASE (Begin 1989) (ICD9)  
 088.82 BABESIOSIS (Begin 1993) (ICD9)  
 088.89 OTH ARTHROPOD-BORNE DIS (Begin 1989) (ICD9)  
 088.9 ARTHROPOD-BORNE DIS NOS (ICD9)  
 090.0 EARLY CONG SYPH SYMPTOM (ICD9)  
 090.1 EARLY CONGEN SYPH LATENT (ICD9)  
 090.2 EARLY CONGEN SYPH NOS (ICD9)  
 090.3 SYPHILITIC KERATITIS (ICD9)  
 090.40 JUVENILE NEUROSYPH NOS (ICD9)  
 090.41 CONGEN SYPH ENCEPHALITIS (ICD9)  
 090.42 CONGEN SYPH MENINGITIS (ICD9)  
 090.49 JUVENILE NEUROSYPH NEC (ICD9)  
 090.5 LATE CONGEN SYPH SYMPTOM (ICD9)  
 090.6 LATE CONGEN SYPH LATENT (ICD9)  
 090.7 LATE CONGEN SYPH NOS (ICD9)  
 090.9 CONGENITAL SYPHILIS NOS (ICD9)  
 091.0 PRIMARY GENITAL SYPHILIS (ICD9)  
 091.1 PRIMARY ANAL SYPHILIS (ICD9)  
 091.2 PRIMARY SYPHILIS NEC (ICD9)  
 091.3 SECONDARY SYPH SKIN (ICD9)  
 091.4 SYPHILITIC ADENOPATHY (ICD9)  
 091.50 SYPHILITIC UVEITIS NOS (ICD9)  
 091.51 SYPHILIT CHORIORETINITIS (ICD9)  
 091.52 SYPHILITIC IRIDOCYCLITIS (ICD9)  
 091.61 SYPHILITIC PERIOSTITIS (ICD9)  
 091.62 SYPHILITIC HEPATITIS (ICD9)  
 091.69 SECOND SYPH VISCERA NEC (ICD9)  
 091.7 SECOND SYPHILIS RELAPSE (ICD9)  
 091.81 ACUTE SYPHIL MENINGITIS (ICD9)  
 091.82 SYPHILITIC ALOPECIA (ICD9)  
 091.89 SECONDARY SYPHILIS NEC (ICD9)  
 091.9 SECONDARY SYPHILIS NOS (ICD9)  
 092.0 EARLY SYPH LATENT RELAPS (ICD9)  
 092.9 EARLY SYPHIL LATENT NOS (ICD9)  
 093.0 AORTIC ANEURYSM- SYPHIL (ICD9)  
 093.1 SYPHILITIC AORTITIS (ICD9)  
 093.20 SYPHIL ENDOCARDITIS NOS (ICD9)  
 093.21 SYPHILITIC MITRAL VALVE (ICD9)  
 093.22 SYPHILITIC AORTIC VALVE (ICD9)  
 093.23 SYPHIL TRICUSPID VALVE (ICD9)  
 093.24 SYPHIL PULMONARY VALVE (ICD9)  
 093.81 SYPHILITIC PERICARDITIS (ICD9)  
 093.82 SYPHILITIC MYOCARDITIS (ICD9)  
 093.89 CARDIOVASCULAR SYPH NEC (ICD9)  
 093.9 CARDIOVASCULAR SYPH NOS (ICD9)  
 094.0 TABES DORSALIS (ICD9)  
 094.1 GENERAL PARESIS (ICD9)  
 094.2 SYPHILITIC MENINGITIS (ICD9)  
 094.3 ASYMPTOMAT NEUROSYPHILIS (ICD9)  
 094.81 SYPHILITIC ENCEPHALITIS (ICD9)  
 094.82 SYPHILITIC PARKINSONISM (ICD9)  
 094.83 SYPH DISSEM RETINITIS (ICD9)  
 094.84 SYPHILITIC OPTIC ATROPHY (ICD9)  
 094.85 SYPH RETROBULB NEURITIS (ICD9)  
 094.86 SYPHIL ACOUSTIC NEURITIS (ICD9)  
 094.87 SYPH RUPT CEREB ANEURYSM (ICD9)  
 094.89 NEUROSYPHILIS NEC (ICD9)

094.9 NEUROSYPHILIS NOS (ICD9)  
 095.0 SYPHILITIC EPISCLERITIS (ICD9)  
 095.1 SYPHILIS OF LUNG (ICD9)  
 095.2 SYPHILITIC PERITONITIS (ICD9)  
 095.3 SYPHILIS OF LIVER (ICD9)  
 095.4 SYPHILIS OF KIDNEY (ICD9)  
 095.5 SYPHILIS OF BONE (ICD9)  
 095.6 SYPHILIS OF MUSCLE (ICD9)  
 095.7 SYPHILIS OF TENDON/BURSA (ICD9)  
 095.8 LATE SYMPT SYPHILIS NEC (ICD9)  
 095.9 LATE SYMPT SYPHILIS NOS (ICD9)  
 096 LATE SYPHILIS LATENT (ICD9)  
 097.0 LATE SYPHILIS NOS (ICD9)  
 097.1 LATENT SYPHILIS NOS (ICD9)  
 097.9 SYPHILIS NOS (ICD9)  
 098.0 ACUTE GC INFECT LOWER GU (ICD9)  
 098.10 GC (ACUTE) UPPER GU NOS (ICD9)  
 098.11 GC CYSTITIS (ACUTE) (ICD9)  
 098.12 GC PROSTATITIS (ACUTE) (ICD9)  
 098.13 GC ORCHITIS (ACUTE) (ICD9)  
 098.14 GC SEM VESICULIT (ACUTE) (ICD9)  
 098.15 GC CERVICITIS (ACUTE) (ICD9)  
 098.16 GC ENDOMETRITIS (ACUTE) (ICD9)  
 098.17 ACUTE GC SALPINGITIS (ICD9)  
 098.19 GC (ACUTE) UPPER GU NEC (ICD9)  
 098.2 CHR GC INFECT LOWER GU (ICD9)  
 098.30 CHR GC UPPER GU NOS (ICD9)  
 098.31 GC CYSTITIS- CHRONIC (ICD9)  
 098.32 GC PROSTATITIS- CHRONIC (ICD9)  
 098.33 GC ORCHITIS- CHRONIC (ICD9)  
 098.34 GC SEM VESICULITIS- CHR (ICD9)  
 098.35 GC CERVICITIS- CHRONIC (ICD9)  
 098.36 GC ENDOMETRITIS- CHRONIC (ICD9)  
 098.37 GC SALPINGITIS (CHRONIC) (ICD9)  
 098.39 CHR GC UPPER GU NEC (ICD9)  
 098.40 GONOCOCCAL CONJUNCTIVIT (ICD9)  
 098.41 GONOCOCCAL IRIDOCYCLITIS (ICD9)  
 098.42 GONOCOCCAL ENDOPHTHALMIA (ICD9)  
 098.43 GONOCOCCAL KERATITIS (ICD9)  
 098.49 GONOCOCCAL EYE NEC (ICD9)  
 098.50 GONOCOCCAL ARTHRITIS (ICD9)  
 098.51 GONOCOCCAL SYNOVITIS (ICD9)  
 098.52 GONOCOCCAL BURSITIS (ICD9)  
 098.53 GONOCOCCAL SPONDYLITIS (ICD9)  
 098.59 GC INFECT JOINT NEC (ICD9)  
 098.6 GONOCOCCAL INFEC PHARYNX (ICD9)  
 098.7 GC INFECT ANUS & RECTUM (ICD9)  
 098.81 GONOCOCCAL KERATOSIS (ICD9)  
 098.82 GONOCOCCAL MENINGITIS (ICD9)  
 098.83 GONOCOCCAL PERICARDITIS (ICD9)  
 098.84 GONOCOCCAL ENDOCARDITIS (ICD9)  
 098.85 GONOCOCCAL HEART DIS NEC (ICD9)  
 098.86 GONOCOCCAL PERITONITIS (ICD9)  
 098.89 GONOCOCCAL INF SITE NEC (ICD9)  
 099.0 CHANCROID (ICD9)  
 099.1 LYMPHOGRANULOMA VENEREUM (ICD9)  
 099.2 GRANULOMA INGUINALE (ICD9)  
 099.4 NONGONOCOCC URETHRIT NEC (Begin 1980 (ICD9)  
 099.40 UNSPEC URETHRITIS (Begin 1992) (ICD9)  
 099.41 CHLAMYDIA URETHRITIS (Begin 1992) (ICD9)

099.49 NONGONOCOCC URETHRIT NEC (Begin 1992) (ICD9)  
 099.50 CHLAMYDIA-UNSPEC SITE (Begin 1992) (ICD9)  
 099.51 CHLAMYDIA-PHARYNX (Begin 1992) (ICD9)  
 099.52 CHLAMYDIA-ANUS RECTUM (Begin 1992) (ICD9)  
 099.53 CHLAMYDIA-LOWER GU (Begin 1992) (ICD9)  
 099.54 CHLAMYDIA-OTHER GU (Begin 1992) (ICD9)  
 099.55 CHLAMYDIA-UNSPEC GU (Begin 1992) (ICD9)  
 099.56 CHLAMYDIA-PERITONEUM (Begin 1992) (ICD9)  
 099.59 CHLAMYDIA-NSC (Begin 1992) (ICD9)  
 099.8 VENEREAL DISEASE NEC (ICD9)  
 099.9 VENEREAL DISEASE NOS (ICD9)  
 100.0 LEPTOSPIROS ICTEROHEM (ICD9)  
 100.81 LEPTOSPIRAL MENINGITIS (ICD9)  
 100.89 LEPTOSPIRAL INFECT NEC (ICD9)  
 100.9 LEPTOSPIROSIS NOS (ICD9)  
 101 VINCENT-S ANGINA (ICD9)  
 102.0 INITIAL LESIONS YAWS (ICD9)  
 102.1 MULTIPLE PAPILLOMATA (ICD9)  
 102.2 EARLY SKIN YAWS NEC (ICD9)  
 102.3 HYPERKERATOSIS OF YAWS (ICD9)  
 102.4 GUMMATA AND ULCERS- YAWS (ICD9)  
 102.5 GANGOSA (ICD9)  
 102.6 YAWS OF BONE & JOINT (ICD9)  
 102.7 YAWS MANIFESTATIONS NEC (ICD9)  
 102.8 LATENT YAWS (ICD9)  
 102.9 YAWS NOS (ICD9)  
 103.0 PINTA PRIMARY LESIONS (ICD9)  
 103.1 PINTA INTERMED LESIONS (ICD9)  
 103.2 LATE LESIONS OF PINTA  
 103.3 PINTA MIXED LESIONS (ICD9)  
 103.9 PINTA NOS (ICD9)  
 104.0 NONVENEREAL ENDEMIC SYPH (ICD9)  
 104.8 SPIROCHETAL INFECT NEC (ICD9)  
 104.9 SPIROCHETAL INFECT NOS (ICD9)  
 110.0 DERMATOPHYT SCALP/BEARD (ICD9)  
 110.1 DERMATOPHYTOSIS OF NAIL (ICD9)  
 110.2 DERMATOPHYTOSIS OF HAND (ICD9)  
 110.3 DERMATOPHYTOSIS OF GROIN (ICD9)  
 110.4 DERMATOPHYTOSIS OF FOOT (ICD9)  
 110.5 DERMATOPHYTOSIS OF BODY (ICD9)  
 110.6 DEEP DERMATOPHYTOSIS (ICD9)  
 110.8 DERMATOPHYTOSIS SITE NEC (ICD9)  
 110.9 DERMATOPHYTOSIS SITE NOS (ICD9)  
 111.0 PITYRIASIS VERSICOLOR (ICD9)  
 111.1 TINEA NIGRA (ICD9)  
 111.2 TINEA BLANCA (ICD9)  
 111.3 BLACK PIEDRA (ICD9)  
 111.8 DERMATOMYCOSES NEC (ICD9)  
 111.9 DERMATOMYCOSIS NOS (ICD9)  
 112.0 THRUSH (ICD9)  
 112.1 CANDIDAL VULVOVAGINITIS (ICD9)  
 112.2 CANDIDIAS UROGENITAL NEC (ICD9)  
 112.3 CUTANEOUS CANDIDIASIS (ICD9)  
 112.4 CANDIDIASIS OF LUNG (ICD9)  
 112.5 DISSEMINATED CANDIDIASIS (ICD9)  
 112.81 CANDIDAL ENDOCARDITIS  
 112.82 CANDIDAL OTITIS EXTERNA (ICD9)  
 112.83 CANDIDAL MENINGITIS (ICD9)  
 112.84 CANDIDAL ESOPHAGITIS (Begin 1992) (ICD9)  
 112.85 CANDIDAL ENTERITIS (Begin 1992) (ICD9)

112.89 CANDIDIASIS SITE NEC (ICD9)  
 112.9 CANDIDIASIS SITE NOS (ICD9)  
 114.0 PRIMARY COCCIDIOIDOMYCOS (ICD9)  
 114.1 PRIM CUTAN COCCIDIOID (ICD9)  
 114.2 COCCIDIOIDAL MENINGITIS (ICD9)  
 114.3 PROGRESS COCCIDIOID NEC (ICD9)  
 114.4 CHRONIC PULMON COCCIDIOIDOMYCOSIS (Begin 1993) (ICD9)  
 114.5 UNSPEC PULMON COCCIDIOIDOMYCOSIS (Begin 1993) (ICD9)  
 114.9 COCCIDIOIDOMYCOSIS NOS (ICD9)  
 115.00 HISTOPLASMA CAPSULAT NOS (ICD9)  
 115.01 HISTOPLASM CAPSUL MENING (ICD9)  
 115.02 HISTOPLASM CAPSUL RETINA (ICD9)  
 115.05 HISTOPLASM CAPS PNEUMON (ICD9)  
 115.09 HISTOPLASMA CAPSULAT NEC (ICD9)  
 115.10 HISTOPLASMA DUBOISII NOS (ICD9)  
 115.11 HISTOPLASM DUBOIS MENING (ICD9)  
 115.12 HISTOPLASM DUBOIS RETINA (ICD9)  
 115.15 HISTOPLASM DUB PNEUMONIA (ICD9)  
 115.19 HISTOPLASMA DUBOISII NEC (ICD9)  
 115.90 HISTOPLASMOSIS NOS (ICD9)  
 115.91 HISTOPLASMOSIS MENINGIT (ICD9)  
 115.92 HISTOPLASMOSIS RETINITIS (ICD9)  
 115.95 HISTOPLASMOSIS PNEUMONIA (ICD9)  
 115.99 HISTOPLASMOSIS NEC (ICD9)  
 116.0 BLASTOMYCOSIS (ICD9)  
 116.1 PARACOCCIDIOIDOMYCOSIS (ICD9)  
 116.2 LOBOMYCOSIS (ICD9)  
 117.0 RHINOSPORIDIOSIS (ICD9)  
 117.1 SPOROTRICHOSIS (ICD9)  
 117.2 CHROMOBLASTOMYCOSIS (ICD9)  
 117.3 ASPERGILLOSIS (ICD9)  
 117.4 MYCOTIC MYCETOMAS (ICD9)  
 117.5 CRYPTOCOCCOSIS (ICD9)  
 117.6 ALLESCHERIOSIS (ICD9)  
 117.7 ZYGOMYCOSIS (ICD9)  
 117.8 DEMATIACIOUS FUNGI INF (ICD9)  
 117.9 MYCOSES NEC & NOS (ICD9)  
 118 OPPORTUNISTIC MYCOSES (ICD9)  
 120.0 SCHISTOSOMA HAEMATOBIMUM (ICD9)  
 120.1 SCHISTOSOMA MANSONI (ICD9)  
 120.2 SCHISTOSOMA JAPONICUM (ICD9)  
 120.3 CUTANEOUS SCHISTOSOMA (ICD9)  
 120.8 SCHISTOSOMIASIS NEC (ICD9)  
 120.9 SCHISTOSOMIASIS NOS (ICD9)  
 121.0 OPISTHORCHIASIS (ICD9)  
 121.1 CLONORCHIASIS (ICD9)  
 121.2 PARAGONIMIASIS (ICD9)  
 121.3 FASCIOLIASIS (ICD9)  
 121.4 FASCIOLOPSIASIS (ICD9)  
 121.5 METAGONIMIASIS (ICD9)  
 121.6 HETEROPHYIASIS (ICD9)  
 121.8 TREMATODE INFECTION NEC (ICD9)  
 121.9 TREMATODE INFECTION NOS (ICD9)  
 122.0 ECHINOCOCC GRANUL LIVER (ICD9)  
 122.1 ECHINOCOCC GRANUL LUNG (ICD9)  
 122.2 ECHINOCOCC GRAN THYROID (ICD9)  
 122.3 ECHINOCOCC GRANUL NEC (ICD9)  
 122.4 ECHINOCOCC GRANUL NOS (ICD9)  
 122.5 ECHINOCOC MULTILOC LIVER (ICD9)  
 122.6 ECHINOCOCC MULTILOC NEC (ICD9)

122.7 ECHINOCOCC MULTILOC NOS (ICD9)  
122.8 ECHINOCOCCOSIS NOS LIVER (ICD9)  
122.9 ECHINOCOCCOSIS NEC/NOS (ICD9)  
123.0 TAENIA SOLIUM INTESTINE (ICD9)  
123.1 CYSTICERCOSIS (ICD9)  
123.2 TAENIA SAGINATA INFECT (ICD9)  
123.3 TAENIASIS NOS (ICD9)  
123.4 DIPHYLLOBOTHRIAS INTEST (ICD9)  
123.5 SPARGANOSIS (ICD9)  
123.6 HYMENOLEPIASIS (ICD9)  
123.8 CESTODE INFECTION NEC (ICD9)  
123.9 CESTODE INFECTION NOS (ICD9)  
124 TRICHINOSIS (ICD9)  
125.0 BANCROFTIAN FILARIASIS (ICD9)  
125.1 MALAYAN FILARIASIS (ICD9)  
125.2 LOIASIS (ICD9)  
125.3 ONCHOCERCIASIS (ICD9)  
125.4 DIPETALONEMIASIS (ICD9)  
125.5 MANSONELLA OZZARDI INFEC (ICD9)  
125.6 FILARIASIS NEC (ICD9)  
125.7 DRACONTIASIS (ICD9)  
125.9 FILARIASIS NOS (ICD9)  
126.0 ANCYLOSTOMA DUODENALE (ICD9)  
126.1 NECATOR AMERICANUS (ICD9)  
126.2 ANCYLOSTOMA BRAZILIENSE (ICD9)  
126.3 ANCYLOSTOMA CEYLANICUM (ICD9)  
126.8 ANCYLOSTOMA NEC (ICD9)  
126.9 ANCYLOSTOMIASIS NOS (ICD9)  
127.0 ASCARIASIS (ICD9)  
127.1 ANISAKIASIS (ICD9)  
127.2 STRONGYLOIDIASIS (ICD9)  
127.3 TRICHURIASIS (ICD9)  
127.4 ENTEROBIASIS (ICD9)  
127.5 CAPILLARIASIS (ICD9)  
127.6 TRICHOSTRONGYLIASIS (ICD9)  
127.7 INTEST HELMINTHIASIS NEC (ICD9)  
127.8 MIXED INTESTINE HELMINTH (ICD9)  
127.9 INTEST HELMINTHIASIS NOS (ICD9)  
128.0 TOXOCARIASIS (ICD9)  
128.1 GNATHOSTOMIASIS (ICD9)  
128.8 HELMINTHIASIS NEC (ICD9)  
128.9 HELMINTHIASIS NOS (ICD9)  
129 INTESTIN PARASITISM NOS (ICD9)  
130.0 TOXOPLASM MENINGOENCEPH (ICD9)  
130.1 TOXOPLASM CONJUNCTIVITIS (ICD9)  
130.2 TOXOPLASM CHORIORETINIT (ICD9)  
130.4 TOXOPLASMA PNEUMONITIS (ICD9)  
130.5 TOXOPLASMA HEPATITIS (ICD9)  
130.7 TOXOPLASMOSIS SITE NEC (ICD9)  
130.8 MULTISYSTEM TOXOPLASMOS (ICD9)  
130.9 TOXOPLASMOSIS NOS (ICD9)  
131.0 UROGENITAL TRICHOMON NOS (ICD9)  
131.01 TRICHOMONAL VAGINITIS (ICD9)  
131.02 TRICHOMONAL URETHRITIS (ICD9)  
131.03 TRICHOMONAL PROSTATITIS (ICD9)  
131.09 UROGENITAL TRICHOMON NEC (ICD9)  
131.8 TRICHOMONIASIS NEC (ICD9)  
131.9 TRICHOMONIASIS NOS (ICD9)  
132.0 PEDICULUS CAPITIS (ICD9)  
132.1 PEDICULUS CORPORIS (ICD9)

132.2 PHTHIRUS PUBIS (ICD9)  
 132.3 MIXED PEDICUL & PHTHIRUS (ICD9)  
 132.9 PEDICULOSIS NOS (ICD9)  
 133.0 SCABIES (ICD9)  
 133.8 ACARIASIS NEC (ICD9)  
 133.9 ACARIASIS NOS (ICD9)  
 134.0 MYIASIS (ICD9)  
 134.1 ARTHROPOD INFEST NEC (ICD9)  
 134.2 HIRUDINIASIS (ICD9)  
 134.8 INFESTATION NEC (ICD9)  
 134.9 INFESTATION NOS (ICD9)  
 135 SARCOIDOSIS (ICD9)  
 136.0 AINHUM (ICD9)  
 136.2 FREE-LIVING AMEBA INFECT (ICD9)  
 136.21 SPECIFIC INFECTION DUE TO ACANTHAMOEBA  
 136.29 OTHER SPECIFIC INFECTIONS BY FREE-LIVING AMEBAE  
 136.3 PNEUMOCYSTOSIS (ICD9)  
 136.4 PSOROSPERMIASIS (ICD9)  
 136.5 SARCOSPORIDIOSIS (ICD9)  
 136.8 INFECT/PARASITE DIS NEC (ICD9)  
 136.9 INFECT/PARASITE DIS NOS (ICD9)  
 283.11 HEMOLYTIC-UREMIC SYNDROME  
 320.0 HEMOPHILUS MENINGITIS (ICD9)  
 320.1 PNEUMOCOCCAL MENINGITIS (ICD9)  
 320.2 STREPTOCOCCAL MENINGITIS (ICD9)  
 320.3 STAPHYLOCOCC MENINGITIS (ICD9)  
 320.7 MENING IN OTH BACT DIS (ICD9)  
 320.8 BACTERIAL MENINGITIS NEC (Begin 1980 (ICD9)  
 320.81 ANAEROBIC MENINGITIS (Begin 1992) (ICD9)  
 320.82 GRAM NEG MENINGITIS NEC (Begin 1992) (ICD9)  
 320.89 OTH BACTER MENINGITIS (Begin 1992) (ICD9)  
 320.9 BACTERIAL MENINGITIS NOS (ICD9)  
 321.0 CRYPTOCOCCAL MENINGITIS (ICD9)  
 321.1 MENING IN OTH FUNGAL DIS (ICD9)  
 321.2 MENING IN OTH VIRAL DIS (ICD9)  
 321.3 TRYPANOSOMIASIS MENINGIT (ICD9)  
 321.4 MENINGIT D/T SARCOIDOSIS (ICD9)  
 321.8 MENING IN OTH NONBAC DIS (ICD9)  
 322.0 NONPYOGENIC MENINGITIS (ICD9)  
 322.1 EOSINOPHILIC MENINGITIS (ICD9)  
 322.2 CHRONIC MENINGITIS (ICD9)  
 322.9 MENINGITIS NOS (ICD9)  
 323.0 ENCEPHALIT IN VIRAL DIS (ICD9)  
 323.01 ENCEPH/ENCEPHMYE OTH DIS (Begin 2006) (ICD9)  
 323.02 MYELITIS-OTH VIRAL DIS (Begin 2006) (ICD9)  
 323.1 RICKETTSIAL ENCEPHALITIS (ICD9)  
 323.2 PROTOZOAL ENCEPHALITIS (ICD9)  
 323.4 OTH ENCEPHALIT D/T INFEC (ICD9)  
 323.41 ENCEPH/MYELITIS-OTH INF (Begin 2006) (ICD9)  
 323.42 MYELITIS D/T OTH INFECT (Begin 2006) (ICD9)  
 323.6 POSTINFECT ENCEPHALITIS (ICD9)  
 323.61 INF AC DIS ENCEPHALOMYEL (Begin 2006) (ICD9)  
 323.62 POSTINF ENCEPHALITIS NEC (Begin 2006) (ICD9)  
 323.63 POSTINFECTIOUS MYELITIS (Begin 2006) (ICD9)  
 323.8 ENCEPHALITIS NEC (ICD9)  
 323.81 ENCEPH & ENCEPHLALO NEC (Begin 2006) (ICD9)  
 323.82 MYELITIS CAUSE NEC (Begin 2006) (ICD9)  
 323.9 ENCEPHALITIS NOS (ICD9)  
 324.0 INTRACRANIAL ABSCESS (ICD9)  
 324.1 INTRASPINAL ABSCESS (ICD9)

324.9 CNS ABSCESS NOS (ICD9)  
325 PHLEBITIS AND THROMBOPHLEBITIS OF INTRACRANIAL VENOUS SINUSES  
326 LATE EFF CNS ABSCESS (ICD9)  
357.0 AC INFECT POLYNEURITIS (ICD9)  
360.00 PURULENT ENDOPHTHALM NOS (ICD9)  
360.01 ACUTE ENDOPHTHALMITIS (ICD9)  
360.02 PANOPHTHALMITIS (ICD9)  
360.03 CHRONIC ENDOPHTHALMITIS (ICD9)  
360.04 VITREOUS ABSCESS (ICD9)  
360.11 SYMPATHETIC UVEITIS (ICD9)  
360.12 PANUVEITIS (ICD9)  
360.13 PARASITIC ENDOPHTHAL NOS (ICD9)  
360.14 OPHTHALMIA NODOSA (ICD9)  
360.19 ENDOPHTHALMITIS NEC (ICD9)  
363.20 CHORIORETINITIS NOS (ICD9)  
364.03 SECONDARY IRITIS- INFECT (ICD9)  
364.05 HYPOPYON (ICD9)  
370.55 CORNEAL ABSCESS (ICD9)  
372.00 ACUTE CONJUNCTIVITIS NOS (ICD9)  
372.01 SEROUS CONJUNCTIVITIS (ICD9)  
372.02 AC FOLLIC CONJUNCTIVITIS (ICD9)  
372.03 MUCOPUR CONJUNCTIVIT NEC (ICD9)  
372.04 PSEUDOMEMB CONJUNCTIVIT (ICD9)  
372.15 PARASITIC CONJUNCTIVITIS (ICD9)  
372.20 BLEPHAROCONJUNCTIVIT NOS (ICD9)  
373.00 BLEPHARITIS NOS (ICD9)  
373.01 ULCERATIVE BLEPHARITIS (ICD9)  
373.02 SQUAMOUS BLEPHARITIS (ICD9)  
373.11 HORDEOLUM EXTERNUM (ICD9)  
373.12 HORDEOLUM INTERNUM (ICD9)  
373.13 ABSCESS OF EYELID (ICD9)  
373.2 CHALAZION (ICD9)  
373.4 INFECT DERM LID W DEFORM (ICD9)  
373.5 INFEC DERMATITIS LID NEC (ICD9)  
373.6 PARASITIC INFEST EYELID (ICD9)  
376.01 ORBITAL CELLULITIS (ICD9)  
376.02 ORBITAL PERIOSTITIS (ICD9)  
376.03 ORBITAL OSTEOMYELITIS (ICD9)  
376.04 ORBITAL TENONITIS (ICD9)  
376.13 PARASITE INFEST- ORBIT (ICD9)  
379.60 INFLAM POSTPROC BLEB NOS (Begin 2006) (ICD9)  
379.61 INFLAM POSTPROC BLEB (ICD9)  
379.62 INFLAM POSTPROC BLEB (ICD9)  
379.63 INFLAM POSTPROC BLEB (ICD9)  
380.10 INFEC OTITIS EXTERNA NOS (ICD9)  
380.11 ACUTE INFECTION OF PINNA (ICD9)  
380.12 ACUTE SWIMMERS EAR (ICD9)  
380.13 AC INFECT EXTERN EAR NEC (ICD9)  
380.14 MALIGNANT OTITIS EXTERNA (ICD9)  
380.15 CHR MYCOT OTITIS EXTERNA (ICD9)  
380.16 CHR INF OTIT EXTERNA NEC (ICD9)  
380.23 CHR OTITIS EXTERNA NEC (ICD9)  
381.00 AC NONSUP OTITIS MED NOS (ICD9)  
381.01 AC SEROUS OTITIS MEDIA (ICD9)  
381.02 AC MUCOID OTITIS MEDIA (ICD9)  
381.03 ACUTE SANGUINOUS OTITIS MEDIA (ICD9)  
381.10 CHR SEROUS OM SIMP/NOS (ICD9)  
381.19 CHR SEROUS OM NEC (ICD9)  
381.20 CHR MUCOID OM SIMP/NOS (ICD9)  
381.29 CHR MUCOID OM NEC (ICD9)



381.3 CHR NONSUP OM NOS/NEC (ICD9)  
381.4 NONSUPP OTITIS MEDIA NOS (ICD9)  
382.00 AC SUPP OTITIS MEDIA NOS (ICD9)  
382.01 AC SUPP OM W DRUM RUPT (ICD9)  
382.02 AC SUPP OM IN OTH DIS (ICD9)  
382.1 CHR TUBOTYMPAN SUPPUR OM (ICD9)  
382.2 CHR ATTICOANTRAL SUP OM (ICD9)  
382.3 CHR SUP OTITIS MEDIA NOS (ICD9)  
382.4 SUPPUR OTITIS MEDIA NOS (ICD9)  
382.9 OTITIS MEDIA NOS (ICD9)  
383.00 AC MASTOIDITIS W/O COMPL (ICD9)  
383.01 SUBPERI MASTOID ABSCESS (ICD9)  
383.02 AC MASTOIDITIS-COMPL NEC (ICD9)  
383.1 CHRONIC MASTOIDITIS (ICD9)  
383.20 PETROSITIS NOS (ICD9)  
383.21 ACUTE PETROSITIS (ICD9)  
383.22 CHRONIC PETROSITIS (ICD9)  
383.30 POSTMASTOID COMPL NOS (ICD9)  
383.31 POSTMASTOID MUCOSAL CYST (ICD9)  
383.32 POSTMASTOID CHOLESTEATMA (ICD9)  
383.33 POSTMASTOID GRANULATIONS (ICD9)  
383.89 DISORDERS OF MASTOID NEC (ICD9)  
383.9 MASTOIDITIS NOS (ICD9)  
384.00 ACUTE MYRINGITIS UNSPECIFIED  
384.01 BULLOUS MYRINGITIS  
384.09 OTHER ACUTE MYRINGITIS WITHOUT OTITIS MEDIA  
384.20 PERFORAT TYMPAN MEMB NOS (ICD9)  
384.21 CENT PERF TYMPANIC MEMB (ICD9)  
384.22 ATTIC PERF TYMPANIC MEMB (ICD9)  
384.23 MARGINAL PERF TYMP NEC (ICD9)  
384.24 MULT PERF TYMPANIC MEMB (ICD9)  
384.25 TOTAL PERF TYMPANIC MEMB (ICD9)  
386.3 LABYRINTHITIS  
386.30 LABYRINTHITIS UNSPECIFIED  
386.31 SEROUS LABYRINTHITIS  
386.32 CIRCUMSCRIBED LABYRINTHITIS  
386.33 SUPPURATIVE LABYRINTHITIS  
386.34 TOXIC LABYRINTHITIS  
386.35 VIRAL LABYRINTHITIS  
388.6 OTORRHEA  
390 RHEUM FEV W/O HRT INVOLV (ICD9)  
391.0 ACUTE RHEUMATIC PERICARDITIS (ICD9)  
391.1 ACUTE RHEUMATIC ENDOCARDITIS (ICD9)  
391.2 ACUTE RHEUMATIC MYOCARDITIS (ICD9)  
391.8 OTHER ACUTE RHEUMATIC HEART DISEASE (ICD9)  
391.9 ACUTE RHEUMATIC HEART DISEASE UNSPECIFIED (ICD9)  
392.0 RHEUMATIC CHOREA WITH HEART INVOLVEMENT (ICD9)  
392.9 RHEUMATIC CHOREA NOS (ICD9)  
393 CHRONIC RHEUMATIC PERICARDITIS  
421.0 ACUTE AND SUBACUTE BACTERIAL ENDOCARDITIS  
449 SEPTIC ARTERIAL EMBOLISM (Begin 2007) (ICD9)  
460 ACUTE NASOPHARYNGITIS (ICD9)  
461.0 AC MAXILLARY SINUSITIS (ICD9)  
461.1 AC FRONTAL SINUSITIS (ICD9)  
461.2 AC ETHMOIDAL SINUSITIS (ICD9)  
461.3 AC SPHENOIDAL SINUSITIS (ICD9)  
461.8 OTHER ACUTE SINUSITIS (ICD9)  
461.9 ACUTE SINUSITIS NOS (ICD9)  
462 ACUTE PHARYNGITIS (ICD9)  
463 ACUTE TONSILLITIS (ICD9)

464.0 ACUTE LARYNGITIS (End 2001) (ICD9)  
 464.00 ACUTE LARYNGITIS- W/O OBSTR (Begin 2001) (ICD9)  
 464.01 ACUTE LARYNGITIS- W OBSTR (Begin 2001) (ICD9)  
 464.10 AC TRACHEITIS NO OBSTRUC (ICD9)  
 464.11 AC TRACHEITIS W OBSTRUCT (ICD9)  
 464.20 AC LARYNGOTRACH NO OBSTR (ICD9)  
 464.21 AC LARYNGOTRACH W OBSTR (ICD9)  
 464.30 AC EPIGLOTTITIS NO OBSTR (ICD9)  
 464.31 AC EPIGLOTTITIS W OBSTR (ICD9)  
 464.4 CROUP (ICD9)  
 464.50 SUPRAGLOTTIS NOS- W/O OBSTR (Begin 2001) (ICD9)  
 464.51 SUPRAGLOTTIS NOS- W/ OBSTR (Begin 2001) (ICD9)  
 465.0 ACUTE LARYNGOPHARYNGITIS (ICD9)  
 465.8 ACUTE URI MULT SITES NEC (ICD9)  
 465.9 ACUTE URI NOS (ICD9)  
 466.0 ACUTE BRONCHITIS (ICD9)  
 466.1 ACUTE BRONCHIOLITIS (End 1996) (ICD9)  
 466.11 RSV BRONCHIOLITIS (Begin 1996) (ICD9)  
 466.19 OTH ACUTE BRONCHIOL (Begin 1996) (ICD9)  
 473.0 CHR MAXILLARY SINUSITIS (ICD9)  
 473.1 CHR FRONTAL SINUSITIS (ICD9)  
 473.2 CHR ETHMOIDAL SINUSITIS (ICD9)  
 473.3 CHR SPHENOIDAL SINUSITIS (ICD9)  
 473.8 CHRONIC SINUSITIS NEC (ICD9)  
 473.9 CHRONIC SINUSITIS NOS- (ICD9)  
 474.0 CHRONIC TONSILLITIS (End 1997) (ICD9)  
 474.00 CHRON TONSILLITIS (Begin 1997) (ICD9)  
 474.01 CHRON ADENOIDITIS (Begin 1997) (ICD9)  
 474.02 CHRON TONSIL ADENOID (Begin 1997) (ICD9)  
 475 PERITONSILLAR ABSCESS (ICD9)  
 476.0 CHRONIC LARYNGITIS (ICD9)  
 476.1 CHRONIC LARYNGOTRACHEITIS (ICD9)  
 478.21 CELLULITIS OF PHARYNX (ICD9)  
 478.22 PARAPHARYNGEAL ABSCESS (ICD9)  
 478.24 RETROPHARYNGEAL ABSCESS (ICD9)  
 478.29 DISEASE OF PHARYNX NEC (ICD9)  
 478.71 LARYNGEAL CELLULITIS (ICD9)  
 480.0 ADENOVIRAL PNEUMONIA (ICD9)  
 480.1 RESP SYNCYT VIRAL PNEUM (ICD9)  
 480.2 PARINFLUENZA VIRAL PNEUM (ICD9)  
 480.3 PNEUMONIA DUE TO SARS-ASSOCIATED CORONAVIRUS (Begin 2003) (ICD9)  
 480.8 VIRAL PNEUMONIA NEC (ICD9)  
 480.9 VIRAL PNEUMONIA NOS (ICD9)  
 481 PNEUMOCOCCAL PNEUMONIA (ICD9)  
 481.9 (no description found)  
 482.0 K. PNEUMONIAE PNEUMONIA (ICD9)  
 482.1 PSEUDOMONAL PNEUMONIA (ICD9)  
 482.2 H.INFLUENZAE PNEUMONIA (ICD9)  
 482.3 STREPTOCOCCAL PNEUMONIA (Begin 1980 (ICD9)  
 482.30 STREP PNEUMONIA UNSPEC (Begin 1992) (ICD9)  
 482.31 GRP A STREP PNEUMONIA (Begin 1992) (ICD9)  
 482.32 GRP B STREP PNEUMONIA (Begin 1992) (ICD9)  
 482.39 OTH STREP PNEUMONIA (Begin 1992) (ICD9)  
 482.4 STAPHYLOCOCCAL PNEUMONIA (End 1998) (ICD9)  
 482.40 STAPH PNEUMONIA UNSP (Begin 1998) (ICD9)  
 482.41 STAPH AUREUS PNEUMON (Begin 1998) (ICD9)  
 482.42 (no description found)  
 482.49 STAPH PNEUMON OTH (Begin 1998) (ICD9)  
 482.8 BACTERIAL PNEUMONIA NEC (Begin 1980 (ICD9)  
 482.81 ANAEROBIC PNEUMONIA (Begin 1992) (ICD9)

482.82 E COLI PNEUMONIA (Begin 1992) (ICD9)  
 482.83 OTH GRAM NEG PNEUMONIA (Begin 1992) (ICD9)  
 482.84 LEGIONNAIRES DX (Begin 1997) (ICD9)  
 482.89 BACT PNEUMONIA NEC (Begin 1992) (ICD9)  
 482.9 BACTERIAL PNEUMONIA NOS (ICD9)  
 483 PNEUMONIA: ORGANISM NEC (Begin 1980 (ICD9)  
 483.0 MYCOPLASMA PNEUMONIA (Begin 1992) (ICD9)  
 483.1 CHLAMYDIA PNEUMONIA (Begin 1996) (ICD9)  
 483.8 OTH SPEC ORG PNEUMONIA (Begin 1992) (ICD9)  
 484.1 PNEUM W CYTOMEG INCL DIS (ICD9)  
 484.3 PNEUMONIA IN WHOOP COUGH (ICD9)  
 484.5 PNEUMONIA IN ANTHRAX (ICD9)  
 484.6 PNEUM IN ASPERGILLOSIS (ICD9)  
 484.7 PNEUM IN OTH SYS MYCOSES (ICD9)  
 484.8 PNEUM IN INFECT DIS NEC (ICD9)  
 485 BRONCOPNEUMONIA ORG NOS (ICD9)  
 486 PNEUMONIA- ORGANISM NOS (ICD9)  
 487.0 INFLUENZA WITH PNEUMONIA (ICD9)  
 487.1 FLU W RESP MANIFEST NEC (ICD9)  
 487.8 FLU W MANIFESTATION NEC (ICD9)  
 488 FLU D/T AVIAN FLU VIRUS (Begin 2007) (ICD9)  
 488.0 (no description found)  
 488.01 FLU D/T IDENTIFIED AVIAN FLU VIRUS WITH PNEUMONIA  
 488.02 FLU D/T IDENTIFIED AVIAN FLU VIRUS WITH OTHER RESPIRATORY  
 MANIFESTATIONS  
 488.09 FLU D/T IDENTIFIED AVIAN FLU VIRUS WITH OTHER MANIFESTATIONS  
 488.1 (no description found)  
 488.11 FLU D/T IDENTIFIED 2009 H1N1 FLU VIRUS WITH PNEUMONIA  
 488.12 FLU D/T IDENTIFIED 2009 H1N1 FLU VIRUS WITH OTHER RESPIRATORY  
 MANIFESTATIONS  
 488.19 FLU D/T IDENTIFIED 2009 H1N1 FLU VIRUS WITH OTHER MANIFESTATIONS  
 488.81 FLU D/T IDENTIFIED NOVEL INFLUENZA A VIRUS W/ PNEUMONIA  
 488.82 FLU D/T IDENTIFIED NOVEL INFLUENZA A VIRUS W/ OTHER RESP  
 MANIFESTATION  
 488.89 FLU D/T IDENTIFIED NOVEL INFLUENZA A VIRUS W/ OTHER MANIFESTATIONS  
 490 BRONCHITIS NOS (ICD9)  
 491.0 SIMPLE CHR BRONCHITIS (ICD9)  
 491.1 MUCOPURUL CHR BRONCHITIS (ICD9)  
 491.2 OBSTRUCT CHR BRONCHITIS (Begin 1980 (ICD9)  
 491.20 OBS CHR BRNC W/O ACT EXA (Begin 1991) (ICD9)  
 491.21 OBS CHR BRNC W ACT EXA (Begin 1991) (ICD9)  
 491.22 OBS CHR BRNC W AC BRNC (Begin 2004) (ICD9)  
 491.8 CHRONIC BRONCHITIS NEC (ICD9)  
 491.9 CHRONIC BRONCHITIS NOS (ICD9)  
 494 BRONCHIECTASIS (End 2000) (ICD9)  
 494.0 BRONCHIECTASIS W/O ACUTE EXACERBATN (Begin 2000) (ICD9)  
 494.1 BRONCHIECTASIS W/ACUTE EXACERBATION (Begin 2000) (ICD9)  
 510.0 EMPYEMA WITH FISTULA (ICD9)  
 510.9 EMPYEMA W/O FISTULA (ICD9)  
 513.0 ABSCESS OF LUNG (ICD9)  
 513.1 ABSCESS OF MEDIASTINUM (ICD9)  
 517.1 RHEUMATIC PNEUMONIA (ICD9)  
 519.2 MEDIASTINITIS (ICD9)  
 519.3 MEDIASTINUM DISEASE NEC (ICD9)  
 522.4 AC APICAL PERIODONTITIS (ICD9)  
 522.5 PERIAPICAL ABSCESS (ICD9)  
 522.6 CHR APICAL PERIODONTITIS (ICD9)  
 522.7 PERIAPICAL ABSC W SINUS (ICD9)  
 523.10 CHRONIC GINGIVITIS, PLAQUE INDUCED (ICD9)  
 523.11 CHRONIC GINGIVITIS, NON-PLAQUE INDUCED (ICD9)

523.3 ACUTE PERIODONTITIS (ICD9)  
523.30 AGGRESSIVE PERIODONTITIS, UNSPECIFIED (ICD9)  
523.31 AGGRESSIVE PERIODONTITIS, LOCALIZED (ICD9)  
523.32 AGGRESSIVE PERIODONTITIS, GENERALIZED (ICD9)  
523.33 ACUTE PERIODONTITIS (ICD9)  
523.4 CHRONIC PERIODONTITIS (ICD9)  
523.40 CHRONIC PERIODONTITIS, UNSPECIFIED (ICD9)  
523.41 CHRONIC PERIODONTITIS, LOCALIZED (ICD9)  
523.42 CHRONIC PERIODONTITIS, GENERALIZED (ICD9)  
523.5 PERIODONTOSIS (ICD9)  
527.3 SALIVARY GLAND ABSCESS (ICD9)  
528.3 CELLULITIS/ABSCESS MOUTH (ICD9)  
558.9 NONINF GASTROENTERIT NEC (ICD9)  
566 ABSCESS OF ANAL AND RECTAL REGION (ICD9)  
567.0 PERITONITIS IN INFECTION (ICD9)  
567.1 PNEUMOCOCCAL PERITONITIS (ICD9)  
567.2 SUPPURATIVE PERITONITIS NEC (End 2005) (ICD9)  
567.21 PERITONITIS (ACUTE) GEN (Begin 2005) (ICD9)  
567.22 PERITONEAL ABSCESS (Begin 2005) (ICD9)  
567.23 SPONTANEOUS BACTERIAL PERITONITIS (Begin 2005) (ICD9)  
567.29 SUPPURATIVE PERITONITIS NEC (Begin 2005) (ICD9)  
567.31 PSOAS MUSCLE ABSCESS (Begin 2005) (ICD9)  
567.38 RETROPERITONEAL ABSCESS NEC (Begin 2005) (ICD9)  
567.39 RETROPERITONEAL INFECTION NEC (Begin 2005) (ICD9)  
567.81 CHOLEPERITONITIS (Begin 2005) (ICD9)  
567.89 PERITONITIS NEC (Begin 2005) (ICD9)  
567.9 PERITONITIS NOS (ICD9)  
569.5 INTESTINAL ABSCESS (ICD9)  
572.0 ABSCESS OF LIVER (ICD9)  
572.1 PORTAL PYEMIA (ICD9)  
573.1 HEPATITIS IN VIRAL INFECTION (ICD9)  
573.2 HEPATITIS IN OTHER INFECTIOUS DISEASE (ICD9)  
574.11 CHOLELITH/GALLBLADDER INFECTION NEC-OBS (ICD9)  
574.30 CHOLEDOCHOLITH/ACUTE GALLBLADDER INFECTION (ICD9)  
574.40 CHOLEDOCHOLITH/GALLBLADDER INFECTION NEC (ICD9)  
575.0 ACUTE CHOLECYSTITIS  
590.2 RENAL/PERIRENAL ABSCESS (ICD9)  
590.81 PYELITIS OR PYELONEPHRITIS IN DISEASES CLASSIFIED ELSEWHERE  
590.9 INFECTION OF KIDNEY UNSPECIFIED  
595.0 ACUTE CYSTITIS (ICD9)  
595.89 OTHER CYSTITIS, INCLUDING ABSCESS OF BLADDER  
597.0 URETHRAL ABSCESS (ICD9)  
598.00 URETHRITIS:INFECTION NOS (ICD9)  
599.0 URINARY TRACT INFECTION NOS (ICD9)  
601.0 ACUTE PROSTATITIS (ICD9)  
601.2 ABSCESS OF PROSTATE (ICD9)  
603.1 INFECTED HYDROCELE (ICD9)  
604.0 ORCHITIS WITH ABSCESS (ICD9)  
611.0 INFLAMMATORY DISEASE OF BREAST  
614.0 ACUTE SALPINGO-OOPHORITIS (ICD9)  
614.1 CHRONIC SALPINGO-OOPHORITIS (ICD9)  
614.2 SALPINGO-OOPHORITIS NOS (ICD9)  
614.3 ACUTE PARAMETRITIS (ICD9)  
614.4 CHRONIC PARAMETRITIS (ICD9)  
614.5 ACUTE PELVIC PERITONITIS-FEM (ICD9)  
614.6 FEMORAL PELVIC PERITONITIS ADHESIONS (ICD9)  
614.7 CHRONIC PELVIC PERITONITIS NEC-FEM (ICD9)  
614.8 FEMORAL PELVIC INFLAMMATORY DISEASE NEC (ICD9)  
614.9 FEMORAL PELVIC INFLAMMATORY DISEASE NOS (ICD9)  
615.0 ACUTE UTERINE INFLAMMATION (ICD9)

615.1 CHR UTERINE INFLAMMATION (ICD9)  
615.9 UTERINE INFLAM DIS NOS (ICD9)  
616.0 CERVICITIS (ICD9)  
616.10 VAGINITIS NOS (ICD9)  
616.11 VAGINITIS IN OTH DISEASE (ICD9)  
616.2 BARTHOLIN-s GLAND CYST (ICD9)  
616.3 BARTHOLIN-s GLND ABSCESS (ICD9)  
616.4 ABSCESS OF VULVA NEC (ICD9)  
634.00 SPON ABOR W PELV INF-UNSP (ICD9)  
634.01 SPON ABOR W PELV INF-INC (ICD9)  
634.02 SPON ABOR W PELV INF-COMP (ICD9)  
635.00 LEG ABOR W PELV INF-UNSP (ICD9)  
635.01 LEG ABOR W PELV INF-INC (ICD9)  
635.02 LEG ABOR W PELV INF-COMP (ICD9)  
636.00 ILLEG AB W PELV INF-UNSP (ICD9)  
636.01 ILLEG AB W PELV INF-INC (ICD9)  
636.02 ILLEG AB W PELV INF-COMP (ICD9)  
637.00 ABORT NOS W PELV INF-UNSP (ICD9)  
637.01 ABORT NOS W PELV INF-INC (ICD9)  
637.02 ABORT NOS W PELV INF-COMP (ICD9)  
638.0 FAILED ATTEMPTED ABORTION COMPLICATED BY GENITAL TRACT AND PELVIC INFECTION  
639.0 POSTABORTION GU INFECT (ICD9)  
646.60 GU INFECT IN PREG-UNSPEC (ICD9)  
646.61 GU INFECTION-DELIVERED (ICD9)  
646.62 GU INFECTION-DELIV W P/P (ICD9)  
646.63 GU INFECTION-ANTEPARTUM (ICD9)  
646.64 POSTPARTUM INFECTIONS OF GENITOURINARY TRACT  
647.00 SYPHILIS OF MOTHER COMPLICATING PREGNANCY CHILDBIRTH OR THE PUERPERIUS UNSPECIFIED AS TO EPISODE OF CARE  
647.01 SYPHILIS OF MOTHER COMPLICATING PREGNANCY WITH DELIVERY  
647.02 SYPHILIS OF MOTHER COMPLICATING PREGNANCY WITH DELIVERY WITH POSTPARTUM COMPLICATION  
647.03 ANTEPARTUM SYPHILIS  
647.04 POSTPARTUM SYPHILIS  
647.10 GONORRHEA OF MOTHER COMPLICATING PREGNANCY CHILDBIRTH OR THE PUERPERIUM UNSPECIFIED AS TO EPISODE OF CARE  
647.11 GONORRHEA OF MOTHER WITH DELIVERY  
647.12 GONORRHEA OF MOTHER WITH DELIVERY WITH POSTPARTUM COMPLICATION  
647.13 ANTEPARTUM GONORRHEA  
647.14 POSTPARTUM GONORRHEA  
647.20 OTHER VENEREAL DISEASES OF MOTHER COMPLICATING PREGNANCY CHILDBIRTH OR PUERPERIUM UNSPECIFIED AS TO EPISODE OF CARE  
647.21 OTHER VENEREAL DISEASES OF MOTHER WITH DELIVERY  
647.22 OTHER VENEREAL DISEASES OF MOTHER WITH DELIVERY WITH POSTPARTUM COMPLICATION  
647.23 OTHER ANTEPARTUM VENEREAL DISEASES  
647.24 OTHER POSTPARTUM VENEREAL DISEASES  
647.30 TB IN PREG-UNSPECIFIED (ICD9)  
647.31 TUBERCULOSIS-DELIVERED (ICD9)  
647.32 TUBERCULOSIS-DELIV W P/P (ICD9)  
647.33 TUBERCULOSIS-ANTEPARTUM (ICD9)  
647.34 TUBERCULOSIS-POSTPARTUM (ICD9)  
647.40 MALARIA IN PREG-UNSPEC (ICD9)  
647.41 MALARIA-DELIVERED (ICD9)  
647.42 MALARIA-DELIVERED W P/P (ICD9)  
647.43 MALARIA-ANTEPARTUM (ICD9)  
647.44 MALARIA-POSTPARTUM (ICD9)  
647.50 RUBELLA IN PREG-UNSPEC (ICD9)  
647.51 RUBELLA-DELIVERED (ICD9)

647.52 RUBELLA-DELIVERED W P/P (ICD9)  
647.53 RUBELLA-ANTEPARTUM (ICD9)  
647.54 RUBELLA-POSTPARTUM (ICD9)  
647.60 OTH VIRUS IN PREG-UNSPEC (ICD9)  
647.61 OTH VIRAL DIS-DELIVERED (ICD9)  
647.62 OTH VIRAL DIS-DEL W P/P (ICD9)  
647.63 OTH VIRAL DIS-ANTEPARTUM (ICD9)  
647.64 OTH VIRAL DIS-POSTPARTUM (ICD9)  
647.80 INF DIS IN PREG NEC-UNSP (ICD9)  
647.81 INFECT DIS NEC-DELIVERED (ICD9)  
647.82 INFECT DIS NEC-DEL W P/P (ICD9)  
647.83 INFECT DIS NEC-ANTEPARTUM (ICD9)  
647.84 INFECT DIS NEC-POSTPARTUM (ICD9)  
647.90 INFECT IN PREG NOS-UNSP (ICD9)  
647.91 INFECT NOS-DELIVERED (ICD9)  
647.92 INFECT NOS-DELIVER W P/P (ICD9)  
647.93 INFECT NOS-ANTEPARTUM (ICD9)  
647.94 INFECT NOS-POSTPARTUM (ICD9)  
658.40 AMNIOTIC INFECTION-UNSP (ICD9)  
658.41 AMNIOTIC INFECTION-DELIV (ICD9)  
658.43 AMNIOTIC INFECTION-ANTEPARTUM (ICD9)  
659.30 SEPTICEMIA IN LABOR-UNSP (ICD9)  
659.31 SEPTICEM IN LABOR-DELIV (ICD9)  
659.33 SEPTICEM IN LABOR-ANTEPARTUM (ICD9)  
670.00 MAJOR PUERP INFECTION-UNSP (Begin 1991) (ICD9)  
670.02 MAJOR PUERP INF-DEL P/P (Begin 1991) (ICD9)  
670.04 MAJOR PUERP INF-POSTPARTUM (Begin 1991) (ICD9)  
670.10 PUERP ENDOMETRITIS, UNSP  
670.12 PUERP ENDOMETRITIS, DELIVERED WITH MENTION OF POSTPARTUM  
COMPLICATION  
670.14 PUERP ENDOMETRITIS, POSTPARTUM CONDITION OR COMPLICATION  
670.20 PUERP SEPSIS, UNSP  
670.22 PUERP SEPSIS, DELIVERED WITH MENTION OF POSTPARTUM COMPLICATION  
670.24 PUERP SEPSIS, POSTPARTUM CONDITION OR COMPLICATION  
670.30 PUERP SEPTIC THROMBOPHLEBITIS, UNSP  
670.32 PUERP SEPTIC THROMBOPHLEBITIS, DELIVERED WITH MENTION OF  
POSTPARTUM COMPLICATION  
670.34 PUERP SEPTIC THROMBOPHLEBITIS, POSTPARTUM CONDITION OR  
COMPLICATION  
670.80 OTHER MAJOR PUERP INFECTION, UNSP  
670.82 OTHER MAJOR PUERP INFECTION, DELIVERED WITH MENTION OF POSTPARTUM  
COMPLICATION  
670.84 OTHER MAJOR PUERP INFECTION, POSTPARTUM CONDITION OR COMPLICATION  
675.00 INFECT NIPPLE PREG-UNSP (ICD9)  
675.01 INFECT NIPPLE-DELIVERED (ICD9)  
675.02 INFECT NIPPLE-DEL W P/P (ICD9)  
675.03 INFECT NIPPLE-ANTEPARTUM (ICD9)  
675.04 INFECT NIPPLE-POSTPARTUM (ICD9)  
675.10 BREAST ABSCESS PREG-UNSP (ICD9)  
675.11 BREAST ABSCESS-DELIVERED (ICD9)  
675.12 BREAST ABSCESS-DEL W P/P (ICD9)  
675.13 BREAST ABSCESS-ANTEPARTUM (ICD9)  
675.14 BREAST ABSCESS-POSTPARTUM (ICD9)  
675.20 MASTITIS IN PREG-UNSPEC (ICD9)  
675.21 MASTITIS-DELIVERED (ICD9)  
675.22 MASTITIS-DELIV W P/P (ICD9)  
675.23 MASTITIS-ANTEPARTUM (ICD9)  
675.24 MASTITIS-POSTPARTUM (ICD9)  
675.80 BREAST INF PREG NEC-UNSP (ICD9)  
675.81 BREAST INFECT NEC-DELIV (ICD9)

675.82 BREAST INF NEC-DEL W P/P (ICD9)  
675.83 BREAST INF NEC-ANTEPART (ICD9)  
675.84 BREAST INF NEC-POSTPART (ICD9)  
675.90 BREAST INF PREG NOS-UNSP (ICD9)  
675.91 BREAST INFECT NOS-DELIV (ICD9)  
675.92 BREAST INF NOS-DEL W P/P (ICD9)  
675.93 BREAST INF NOS-ANTEPART (ICD9)  
675.94 BREAST INF NOS-POSTPART (ICD9)  
680.0 CARBUNCLE OF FACE (ICD9)  
680.1 CARBUNCLE OF NECK (ICD9)  
680.2 CARBUNCLE OF TRUNK (ICD9)  
680.3 CARBUNCLE OF ARM (ICD9)  
680.4 CARBUNCLE OF HAND (ICD9)  
680.5 CARBUNCLE OF BUTTOCK (ICD9)  
680.6 CARBUNCLE OF LEG (ICD9)  
680.7 CARBUNCLE OF FURUNCLE OF FOOT (ICD9)  
680.8 CARBUNCLE- SITE NEC (ICD9)  
680.9 CARBUNCLE NOS (ICD9)  
681.00 CELLULITIS- FINGER NOS (ICD9)  
681.01 FELON (ICD9)  
681.02 ONYCHIA OF FINGER (ICD9)  
681.10 CELLULITIS- TOE NOS (ICD9)  
681.11 ONYCHIA OF TOE (ICD9)  
681.9 CELLULITIS OF DIGIT NOS (ICD9)  
682.0 CELLULITIS OF FACE (ICD9)  
682.1 CELLULITIS OF NECK (ICD9)  
682.2 CELLULITIS OF TRUNK (ICD9)  
682.3 CELLULITIS OF ARM (ICD9)  
682.4 CELLULITIS OF HAND (ICD9)  
682.5 CELLULITIS OF BUTTOCK (ICD9)  
682.6 CELLULITIS OF LEG (ICD9)  
682.7 CELLULITIS OF FOOT (ICD9)  
682.8 CELLULITIS- SITE NEC (ICD9)  
682.9 CELLULITIS NOS (ICD9)  
683 ACUTE LYMPHADENITIS (ICD9)  
684 IMPETIGO (ICD9)  
685.0 PILONIDAL CYST W ABSCESS (ICD9)  
685.1 PILONIDAL CYST W/O ABSC (ICD9)  
686.0 PYODERMA (End 1997) (ICD9)  
686.00 PYODERMA NOS (Begin 1997) (ICD9)  
686.01 PYODERMA GANGREN (Begin 1997) (ICD9)  
686.09 PYODERMA NEC (Begin 1997) (ICD9)  
686.1 PYOGENIC GRANULOMA (ICD9)  
686.8 LOCAL SKIN INFECTION NEC (ICD9)  
686.9 LOCAL SKIN INFECTION NOS (ICD9)  
690.8 OTHER ERYTHEMATOSQUAMOUS DERMATOSIS  
694.0 DERMATITIS HERPETIFORMIS (ICD9)  
694.1 SUBCORNEAL PUST DERMATOS (ICD9)  
694.2 JUVEN DERMAT HERPETIFORM (ICD9)  
694.3 IMPETIGO HERPETIFORMIS (ICD9)  
695.3 ROSACEA (ICD9)  
695.81 RITTER'S DISEASE (ICD9)  
696.3 PITYRIASIS ROSEA (ICD9)  
711.00 PYOGEN ARTHRITIS-UNSPEC (ICD9)  
711.01 PYOGEN ARTHRITIS-SHLDER (ICD9)  
711.02 PYOGEN ARTHRITIS-UP/ARM (ICD9)  
711.03 PYOGEN ARTHRITIS-FOREARM (ICD9)  
711.04 PYOGEN ARTHRITIS-HAND (ICD9)  
711.05 PYOGEN ARTHRITIS-PELVIS (ICD9)  
711.06 PYOGEN ARTHRITIS-L/LEG (ICD9)

711.07 PYOGEN ARTHRITIS-ANKLE (ICD9)  
711.08 PYOGEN ARTHRITIS NEC (ICD9)  
711.09 PYOGEN ARTHRITIS-MULT (ICD9)  
711.30 DYSENTER ARTHRIT-UNSPEC (ICD9)  
711.31 DYSENTER ARTHRIT-SHLDER (ICD9)  
711.32 DYSENTER ARTHRIT-UP/ARM (ICD9)  
711.33 DYSENTER ARTHRIT-FOREARM (ICD9)  
711.34 DYSENTER ARTHRIT-HAND (ICD9)  
711.35 DYSENTER ARTHRIT-PELVIS (ICD9)  
711.36 DYSENTER ARTHRIT-L/LEG (ICD9)  
711.37 DYSENTER ARTHRIT-ANKLE (ICD9)  
711.38 DYSENTER ARTHRIT NEC (ICD9)  
711.39 DYSENTER ARTHRIT-MULT (ICD9)  
711.40 BACT ARTHRITIS-UNSPEC (ICD9)  
711.41 BACT ARTHRITIS-SHLDER (ICD9)  
711.42 BACT ARTHRITIS-UP/ARM (ICD9)  
711.43 BACT ARTHRITIS-FOREARM (ICD9)  
711.44 BACT ARTHRITIS-HAND (ICD9)  
711.45 BACT ARTHRITIS-PELVIS (ICD9)  
711.46 BACT ARTHRITIS-L/LEG (ICD9)  
711.47 BACT ARTHRITIS-ANKLE (ICD9)  
711.48 BACT ARTHRITIS NEC (ICD9)  
711.49 BACT ARTHRITIS-MULT (ICD9)  
711.50 VIRAL ARTHRITIS-UNSPEC (ICD9)  
711.51 VIRAL ARTHRITIS-SHLDER (ICD9)  
711.52 VIRAL ARTHRITIS-UP/ARM (ICD9)  
711.53 VIRAL ARTHRITIS-FOREARM (ICD9)  
711.54 VIRAL ARTHRITIS-HAND (ICD9)  
711.55 VIRAL ARTHRITIS-PELVIS (ICD9)  
711.56 VIRAL ARTHRITIS-L/LEG (ICD9)  
711.57 VIRAL ARTHRITIS-ANKLE (ICD9)  
711.58 VIRAL ARTHRITIS NEC (ICD9)  
711.59 VIRAL ARTHRITIS-MULT (ICD9)  
711.60 MYCOTIC ARTHRITIS-UNSPEC (ICD9)  
711.61 MYCOTIC ARTHRITIS-SHLDER (ICD9)  
711.62 MYCOTIC ARTHRITIS-UP/ARM (ICD9)  
711.63 MYCOTIC ARTHRIT-FOREARM (ICD9)  
711.64 MYCOTIC ARTHRITIS-HAND (ICD9)  
711.65 MYCOTIC ARTHRITIS-PELVIS (ICD9)  
711.66 MYCOTIC ARTHRITIS-L/LEG (ICD9)  
711.67 MYCOTIC ARTHRITIS-ANKLE (ICD9)  
711.68 MYCOTIC ARTHRITIS NEC (ICD9)  
711.69 MYCOTIC ARTHRITIS-MULT (ICD9)  
711.70 HELMINTH ARTHRIT-UNSPEC (ICD9)  
711.71 HELMINTH ARTHRIT-SHLDER (ICD9)  
711.72 HELMINTH ARTHRIT-UP/ARM (ICD9)  
711.73 HELMINTH ARTHRIT-FOREARM (ICD9)  
711.74 HELMINTH ARTHRIT-HAND (ICD9)  
711.75 HELMINTH ARTHRIT-PELVIS (ICD9)  
711.76 HELMINTH ARTHRIT-L/LEG (ICD9)  
711.77 HELMINTH ARTHRIT-ANKLE (ICD9)  
711.78 HELMINTH ARTHRIT NEC (ICD9)  
711.79 HELMINTH ARTHRIT-MULT (ICD9)  
711.80 INF ARTHRITIS NEC-UNSPEC (ICD9)  
711.81 INF ARTHRITIS NEC-SHLDER (ICD9)  
711.82 INF ARTHRITIS NEC-UP/ARM (ICD9)  
711.83 INF ARTHRIT NEC-FOREARM (ICD9)  
711.84 INF ARTHRITIS NEC-HAND (ICD9)  
711.85 INF ARTHRITIS NEC-PELVIS (ICD9)  
711.86 INF ARTHRITIS NEC-L/LEG (ICD9)



711.87 INF ARTHRITIS NEC-ANKLE (ICD9)  
 711.88 INF ARTHRIT NEC-OTH SITE (ICD9)  
 711.89 INF ARTHRITIS NEC-MULT (ICD9)  
 711.90 INF ARTHRITIS NOS-UNSPEC (ICD9)  
 711.91 INF ARTHRITIS NOS-SHLDER (ICD9)  
 711.92 INF ARTHRITIS NOS-UP/ARM (ICD9)  
 711.93 INF ARTHRIT NOS-FOREARM (ICD9)  
 711.94 INF ARTHRIT NOS-HAND (ICD9)  
 711.95 INF ARTHRIT NOS-PELVIS (ICD9)  
 711.96 INF ARTHRIT NOS-L/LEG (ICD9)  
 711.97 INF ARTHRIT NOS-ANKLE (ICD9)  
 711.98 INF ARTHRIT NOS-OTH SITE (ICD9)  
 711.99 INF ARTHRITIS NOS-MULT (ICD9)  
 728.0 INFECTIVE MYOSITIS (ICD9)  
 728.86 NECROTIZING FASCIITIS  
 730.00 AC OSTEOMYELITIS-UNSPEC (ICD9)  
 730.01 AC OSTEOMYELITIS-SHLDER (ICD9)  
 730.02 AC OSTEOMYELITIS-UP/ARM (ICD9)  
 730.03 AC OSTEOMYELITIS-FOREARM (ICD9)  
 730.04 AC OSTEOMYELITIS-HAND (ICD9)  
 730.05 AC OSTEOMYELITIS-PELVIS (ICD9)  
 730.06 AC OSTEOMYELITIS-L/LEG (ICD9)  
 730.07 AC OSTEOMYELITIS-ANKLE (ICD9)  
 730.08 AC OSTEOMYELITIS NEC (ICD9)  
 730.09 AC OSTEOMYELITIS-MULT (ICD9)  
 730.10 CHR OSTEOMYELITIS-UNSP (ICD9)  
 730.11 CHR OSTEOMYELIT-SHLDER (ICD9)  
 730.12 CHR OSTEOMYELIT-UP/ARM (ICD9)  
 730.13 CHR OSTEOMYELIT-FOREARM (ICD9)  
 730.14 CHR OSTEOMYELIT-HAND (ICD9)  
 730.15 CHR OSTEOMYELIT-PELVIS (ICD9)  
 730.16 CHR OSTEOMYELIT-L/LEG (ICD9)  
 730.17 CHR OSTEOMYELIT-ANKLE (ICD9)  
 730.18 CHR OSTEOMYELIT NEC (ICD9)  
 730.19 CHR OSTEOMYELIT-MULT (ICD9)  
 730.20 OSTEOMYELITIS NOS-UNSPEC (ICD9)  
 730.21 OSTEOMYELITIS NOS-SHLDER (ICD9)  
 730.22 OSTEOMYELITIS NOS-UP/ARM (ICD9)  
 730.23 OSTEOMYELIT NOS-FOREARM (ICD9)  
 730.24 OSTEOMYELITIS NOS-HAND (ICD9)  
 730.25 OSTEOMYELITIS NOS-PELVIS (ICD9)  
 730.26 OSTEOMYELITIS NOS-L/LEG (ICD9)  
 730.27 OSTEOMYELITIS NOS-ANKLE (ICD9)  
 730.28 OSTEOMYELIT NOS-OTH SITE (ICD9)  
 730.29 OSTEOMYELITIS NOS-MULT (ICD9)  
 730.80 BONE INFECT NEC-UNSPEC (ICD9)  
 730.81 BONE INFECT NEC-SHLDER (ICD9)  
 730.82 BONE INFECT NEC-UP/ARM (ICD9)  
 730.83 BONE INFECT NEC-FOREARM (ICD9)  
 730.84 BONE INFECT NEC-HAND (ICD9)  
 730.85 BONE INFECT NEC-PELVIS (ICD9)  
 730.86 BONE INFECT NEC-L/LEG (ICD9)  
 730.87 BONE INFECT NEC-ANKLE (ICD9)  
 730.88 BONE INFECT NEC-OTH SITE (ICD9)  
 730.89 BONE INFECT NEC-MULT (ICD9)  
 730.90 BONE INFEC NOS-UNSP SITE (ICD9)  
 730.91 BONE INFECT NOS-SHLDER (ICD9)  
 730.92 BONE INFECT NOS-UP/ARM (ICD9)  
 730.93 BONE INFECT NOS-FOREARM (ICD9)  
 730.94 BONE INFECT NOS-HAND (ICD9)

730.95 BONE INFECT NOS-PELVIS (ICD9)  
 730.96 BONE INFECT NOS-L/LEG (ICD9)  
 730.97 BONE INFECT NOS-ANKLE (ICD9)  
 730.98 BONE INFECT NOS-OTH SITE (ICD9)  
 730.99 BONE INFECT NOS-MULT (ICD9)  
 760.2 MATERNAL INFEC AFF NB (ICD9)  
 762.7 CHORIOAMNIONITIS AFF NB (ICD9)  
 770.0 CONGENITAL PNEUMONIA (ICD9)  
 771.0 CONGENITAL RUBELLA (ICD9)  
 771.1 CONGENITAL CYTOMEGALOVIRUS INFECTION (ICD9)  
 771.2 OTHER CONGENITAL INFECTIONS SPECIFIED TO THE PERINATAL PERIOD  
 771.3 TETANUS NEONATORUM (ICD9)  
 771.4 OMPHALITIS OF NEWBORN (ICD9)  
 771.5 NEONATAL INFEC MASTITIS (ICD9)  
 771.6 NEONATAL CONJUNCTIVITIS (ICD9)  
 771.7 NEONATAL CANDIDA INFECT (ICD9)  
 771.8 PERINATAL INFECTION NEC (End 2002) (ICD9)  
 771.81 SEPTICEMIA [SEPSIS] OF NEWBORN (Begin 2002) (ICD9)  
 771.82 URINARY TRACT INFECTION OF NEWBORN (Begin 2002) (ICD9)  
 771.83 BACTEREMIA OF NEWBORN (Begin 2002) (ICD9)  
 771.89 OT INFECTIONS SPEC TO PERINATAL PERIOD (Begin 2002) (ICD9)  
 785.52 SEPTIC SHOCK (Begin 2003) (ICD9)  
 790.7 BACTEREMIA NOS (ICD9)  
 790.8 VIREMIA NOS- (ICD9)  
 795.05 CERVICAL (HPV) DNA POS (Begin 2004) (ICD9)  
 795.15 (no description found)  
 795.19 (no description found)  
 795.3 POSITIVE CULTURE FINDING (End 2002) (ICD9)  
 795.31 NONSPECIFIC POSITIVE FINDINGS/ANTHRAX (Begin 2002) (ICD9)  
 795.39 OTHER NONSPECIFIC POSITIVE CULTURE (Begin 2002) (ICD9)  
 795.71 NONSPECIFIC SEROLOG HIV (Begin 1994) (ICD9)  
 795.8 POSITIVE SERO/VIRAL HIV (Begin 1986 (ICD9)  
 796.75 (no description found)  
 796.79 (no description found)  
 910.1 ABRASION OR FRICTION BURN OF FACE NECK AND SCALP EXCEPT EYE INFECTED  
 910.3 BLISTER OF FACE NECK AND SCALP EXCEPT EYE INFECTED  
 910.5 INSECT BITE HEAD-INFECT (ICD9)  
 910.7 SUPERFICIAL FOREIGN BODY (SPLINTER) OF FACE NECK AND SCALP EXCET EYE  
 WITHOUT MAJOR OPEN WOUND INFECTED  
 910.9 OTHER AND UNSPECIFIED SUPERFICIAL INJURY OF FACE NECK AND SCALP INFECTED  
 911.1 ABRASION OR FRICTION BURN OF TRUNK INFECTED  
 911.3 BLISTER OF TRUNK INFECTED  
 911.5 INSECT BITE NONVENOMOUS OF TRUNK INFECTED  
 911.7 SUPERFICIAL FOREIGN BODY (SPLINTER) OF TRUNK WITHOUT MAJOR OPEN WOUND  
 INFECTED  
 911.9 OTHER AND UNSPECIFIED SUPERFICIAL INJURY OF TRUNK INFECTED  
 912.1 ABRASION OR FRICTION BURN OF SHOULDER AND UPPER ARM INFECTED  
 912.3 BLISTER OF SHOULDER AND UPPER ARM INFECTED  
 912.5 INSECT BITE SHLD/ARM-INF (ICD9)  
 912.7 SUPERFICIAL FOREIGN BODY (SPLINTER) OF SHOULDER AND UPPER ARM WITHOUT  
 MAJOR OPEN WOUND INFECTED  
 912.9 OTHER AND UNSPECIFIED SUPERFICIAL INJURY OF SHOULDER AND UPPER ARM  
 INFECTED  
 913.1 ABRASION OR FRICTION BURN OF ELBOW FOREARM AND WRIST INFECTED  
 913.3 BLISTER OF ELBOW FOREARM AND WRIST INFECTED  
 913.5 INSECT BITE NONVENOMOUS OF ELBOW FOREARM AND WRIST INFECTED  
 913.7 SUPERFICIAL FOREIGN BODY (SPLINTER)OF ELBOW FOREARM AND WRIST WITHOUT  
 MAJOR OPEN WOUND INFECTED  
 913.9 OTHER AND UNSPECIFIED SUPERFICIAL INJURY OF ELBOW FOREARM AND WRIST  
 INFECTED

914.1 ABRASION OR FRICTION BURN OF HAND(S) EXCEPT FINGER(S) ALONE INFECTED  
 914.3 BLISTER OF HAND(S) EXCEPT FINGER(S) ALONE INFECTED  
 914.5 INSECT BITE HAND-INFECT (ICD9)  
 914.7 SUPERFICIAL FOREIGN BODY (SPLINTER) OF HAND(S) EXCEPT FINGER(S) ALONE WITHOUT MAJOR OPEN WOUND INFECTED  
 914.9 OTHER AND UNSPECIFIED SUPERFICIAL INJURY OF HAND(S) EXCEPT FINGER(S) ALONE INFECTED  
 915.1 ABRASION OR FRICTION BURN OF FINGERS INFECTED  
 915.3 BLISTER OF FINGERS INFECTED  
 915.5 INSECT BITE NONVENOMOUS OF FINGERS INFECTED  
 915.7 SUPERFICIAL FOREIGN BODY (SPLINTER) OF FINGERS WITHOUT MAJOR OPEN WOUND INFECTED  
 915.9 OTHER AND UNSPECIFIED SUPERFICIAL INJURY OF FINGERS INFECTED  
 916.1 ABRASION OR FRICTION BURN OF HIP THIGH LEG AND ANKLE INFECTED  
 916.3 BLISTER HIP & LEG-INFECT (ICD9)  
 916.5 INSECT BITE NONVENOMOUS OF HIP THIGH LEG AND ANKLE INFECTED  
 916.7 SUPERFICIAL FOREIGN BODY (SPLINTER) OF HIP THIGH LEG AND ANKLE WITHOUT MAJOR OPEN WOUND INFECTED  
 916.9 OTHER AND UNSPECIFIED SUPERFICIAL INJURY OF HIP THIGH LEG AND ANKLE INFECTED  
 917.1 ABRASION OR FRICTION BURN OF FOOT AND TOE(S) INFECTED  
 917.3 BLISTER OF FOOT AND TOE(S) INFECTED  
 917.5 INSECT BITE NONVENOMOUS OF FOOT AND TOE(S) INFECTED  
 917.7 SUPERFICIAL FOREIGN BODY (SPLINTER) OF FOOT AND TOE(S) WITHOUT MAJOR OPEN WOUND INFECTED  
 917.9 OTHER AND UNSPECIFIED SUPERFICIAL INJURY OF FOOT AND TOE(S) INFECTED  
 919.1 ABRASION OR FRICTION BURN OF OTHER MULTIPLE AND UNSPECIFIED SITES INFECTED  
 919.3 BLISTER NEC-INFECTED (ICD9) OF OTHER MULTIPLE AND UNSPECIFIED SITES INFECTED  
 919.5 INSECT BITE NONVENOMOUS OF OTHER MULTIPLE AND UNSPECIFIED SITES INFECTED  
 919.7 SUPERFICIAL FOREIGN BODY (SPLINTER) OF OTHER MULTIPLE AND UNSPECIFIED SITES WITHOUT MAJOR OPEN WOUND INFECTED  
 919.9 OTHER AND UNSPECIFIED SUPERFICIAL INJURY OF OTHER MULTIPLE AND UNSPECIFIED SITES INFECTED  
 958.3 POSTTRAUM WND INFEC NEC (ICD9)  
 996.60 INFECTION AND INFLAMMATORY REACTION DUE TO UNSPECIFIED DEVICE IMPLANT AND GRAFT  
 996.61 INFECTION AND INFLAMMATORY REACTION DUE TO CARDIAC DEVICE IMPLANT AND GRAFT  
 996.62 INFECTION AND INFLAMMATORY REACTION DUE TO VASCULAR DEVICE IMPLANT AND GRAFT  
 996.63 INFECTION AND INFLAMMATORY REACTION DUE TO NERVOUS SYSTEM DEVICE IMPLANT AND GRAFT  
 996.64 INFECTION AND INFLAMMATORY REACTION DUE TO INDWELLING URINARY CATHETER  
 996.65 INFECTION AND INFLAMMATORY REACTION DUE TO OTHER GENITOURINARY DEVICE IMPLANT AND GRAFT  
 996.66 INFECTION AND INFLAMMATORY REACTION DUE TO INTERNAL JOINT PROSTHESIS  
 996.67 INFECTION AND INFLAMMATORY REACTION DUE TO OTHER INTERNAL ORTHOPEDIC DEVICE IMPLANT AND GRAFT  
 996.68 INFECTION AND INFLAMMATORY REACTION DUE TO PERITONEAL DIALYSIS CATHETER  
 996.69 INFECTION AND INFLAMMATORY REACTION DUE TO OTHER INTERNAL PROSTHETIC DEVICE IMPLANT AND GRAT  
 997.09 (no description available)  
 997.62 INFECTION AMPUTAT STUMP (ICD9)  
 998.51 INFECTED POSTOP SEROMA (Begin 1996) (ICD9)  
 998.59 OTHER POSTOPERATIVE INFECTION  
 999.3 INFEC COMPL MED CARE NEC (end 2007) (ICD9)  
 999.31 OTHER AND UNSPEC INFECTION DUE TO CENTRAL VENOUS CATHETER

999.32 BLOODSTREAM INFECTION DUE TO CENTRAL VENOUS CATHETER  
 999.33 LOCAL INFECTION DUE TO CENTRAL VENOUS CATHETER  
 999.34 ACUTE INFECTION FOLLOWING TRANSFUSION INFUSION OR INJECTION OF  
 BLOOD AND BLOOD PRODUCTS  
 999.39 INFECT FOL INFUS/INJ/VAC (Begin 2007) (ICD9)  
 V08 HIV POSITIVE NOS (Begin 1994) (ICD9)  
 V09.0 INFEC-PENICILLIN-RESIST ORGS (Begin 1993) (ICD9)  
 V09.1 INFEC-CEPHALOSPORIN-RESIST ORGS (Begin 1993) (ICD9)  
 V09.2 INFEC-MACROLIDES-RESIST ORGS (Begin 1993) (ICD9)  
 V09.3 INFEC-TETRACYCLINE-RESIST ORGS (Begin 1993) (ICD9)  
 V09.4 INFEC-AMINOGLYCOSIDE-RESIST ORGS (Begin 1993) (ICD9)  
 V09.50 INFEC-UNRESIST TO MULT QUINOLONONES (Begin 1993) (ICD9)  
 V09.51 INFEC-MULT QUINOLONONES-RESIST ORGS (Begin 1993) (ICD9)  
 V09.6 INFEC-SULFONAMIDES-RESIST ORGS (Begin 1993) (ICD9)  
 V09.70 INFEC-NOT MULTI-ANTIMYCOBACT-RESIS (Begin 1993) (ICD9)  
 V09.71 INFEC-MULTI-ANTIMYCOBAC-RESIS ORGS (Begin 1993) (ICD9)  
 V09.80 INFEC-OTH ORGS NOT MULTIDRUG-RESIS (Begin 1993) (ICD9)  
 V09.81 INFEC-OTH MULTI-DRUG-RESIST ORGS (Begin 1993) (ICD9)  
 V09.90 INFEC-UNSP ORGS NOT MULTIDRUG-RESIS (Begin 1993) (ICD9)  
 V09.91 INFEC-UNSPEC MULTIDRUG-RESIST ORGS (Begin 1993) (ICD9)

A00.0 Cholera due to *Vibrio cholerae* 01, biovar cholerae (ICD10)  
 A00.1 Cholera due to *Vibrio cholerae* 01, biovar eltor (ICD10)  
 A00.9 Cholera, unspecified (ICD10)  
 A01.0 Typhoid fever (ICD10)  
 A01.1 Paratyphoid fever A (ICD10)  
 A01.2 Paratyphoid fever B (ICD10)  
 A01.3 Paratyphoid fever C (ICD10)  
 A01.4 Paratyphoid fever, unspecified (ICD10)  
 A02.0 Salmonella enteritis (ICD10)  
 A02.1 Salmonella sepsis (ICD10)  
 A02.2+ Localised salmonella infections (ICD10)  
 A02.8 Other specified salmonella infections (ICD10)  
 A02.9 Salmonella infection, unspecified (ICD10)  
 A03.0 Shigellosis due to *Shigella dysenteriae* (ICD10)  
 A03.1 Shigellosis due to *Shigella flexneri* (ICD10)  
 A03.2 Shigellosis due to *Shigella boydii* (ICD10)  
 A03.3 Shigellosis due to *Shigella sonnei* (ICD10)  
 A03.8 Other shigellosis (ICD10)  
 A03.9 Shigellosis, unspecified (ICD10)  
 A04.0 Enteropathogenic *Escherichia coli* infection (ICD10)  
 A04.1 Enterotoxigenic *Escherichia coli* infection (ICD10)  
 A04.2 Enteroinvasive *Escherichia coli* infection (ICD10)  
 A04.3 Enterohemorrhagic *Escherichia coli* infection (ICD10)  
 A04.4 Other intestinal *Escherichia coli* infections (ICD10)  
 A04.5 *Campylobacter* enteritis (ICD10)  
 A04.6 Enteritis due to *Yersinia enterocolitica* (ICD10)  
 A04.7 Enterocolitis due to *Clostridium difficile* (ICD10)  
 A04.8 Other specified bacterial intestinal infections (ICD10)  
 A04.9 Bacterial intestinal infection, unspecified (ICD10)  
 A05.0 Foodborne staphylococcal intoxication (ICD10)  
 A05.1 Botulism food poisoning (ICD10)  
 A05.2 Foodborne *Clostridium perfringens* [*Clostridium welchii*] intoxication (ICD10)  
 A05.3 Foodborne *Vibrio parahaemolyticus* intoxication (ICD10)  
 A05.4 Foodborne *Bacillus cereus* intoxication (ICD10)  
 A05.8 Other specified bacterial foodborne intoxications (ICD10)  
 A05.9 Bacterial foodborne intoxication, unspecified (ICD10)  
 A06.0 Acute amebic dysentery (ICD10)  
 A06.1 Chronic intestinal amebiasis (ICD10)

A06.2 Amebic nondysenteric colitis (ICD10)  
A06.3 Amoeboma of intestine (ICD10)  
A06.4 Amebic liver abscess (ICD10)  
A06.5+ Amebic lung abscess (ICD10)  
A06.6+ Amebic brain abscess (ICD10)  
A06.7 Cutaneous amebiasis (ICD10)  
A06.8 Amoebic infection of other sites (ICD10)  
A06.9 Amebiasis, unspecified (ICD10)  
A07.0 Balantidiasis (ICD10)  
A07.1 Giardiasis [lambliasis] (ICD10)  
A07.2 Cryptosporidiosis (ICD10)  
A07.3 Isosporiasis (ICD10)  
A07.8 Other specified protozoal intestinal diseases (ICD10)  
A07.9 Protozoal intestinal disease, unspecified (ICD10)  
A08.0 Rotaviral enteritis (ICD10)  
A08.1 Acute gastroenteropathy due to Norwalk agent (ICD10)  
A08.2 Adenoviral enteritis (ICD10)  
A08.3 Other viral enteritis (ICD10)  
A08.4 Viral intestinal infection, unspecified  
A08.5 Other specified intestinal infections (ICD10)  
A09 Infectious gastroenteritis and colitis, unspecified (ICD10)  
A09.0 Other and unspecified gastroenteritis and colitis of infectious origin  
A09.9 Gastroenteritis and colitis of unspecified origin  
A15.0 Tuberculosis of lung (ICD10)  
A15.1 Tuberculosis of lung, confirmed by culture only (ICD10)  
A15.2 Tuberculosis of lung, confirmed histologically (ICD10)  
A15.3 Tuberculosis of lung, confirmed by unspecified means (ICD10)  
A15.4 Tuberculosis of intrathoracic lymph nodes (ICD10)  
A15.5 Tuberculosis of larynx, trachea and bronchus (ICD10)  
A15.6 Tuberculous pleurisy (ICD10)  
A15.7 Primary respiratory tuberculosis (ICD10)  
A15.8 Other respiratory tuberculosis (ICD10)  
A15.9 Respiratory tuberculosis unspecified, confirmed bacteriologically and histologically (ICD10)  
A16.0 Tuberculosis of lung, bacteriologically and histologically negative  
A16.1 Tuberculosis of lung, bacteriological and histological examination not done (ICD10)  
A16.2 Tuberculosis of lung, without mention of bacteriological or histological confirmation (ICD10)  
A16.3 Tuberculosis of intrathoracic lymph nodes, without mention of bacteriological or histological confir (ICD10)  
A16.4 Tuberculosis of larynx, trachea and bronchus, without mention of bacteriological or histological con (ICD10)  
A16.5 Tuberculous pleurisy, without mention of bacteriological or histological confirmation (ICD10)  
A16.7 Primary respiratory tuberculosis without mention of bacteriological or histological confirmation (ICD10)  
A16.8 Other respiratory tuberculosis, without mention of bacteriological or histological confirmation (ICD10)  
A16.9 Respiratory tuberculosis unspecified, without mention of bacteriological or histological confirmation  
A17.0+ Tuberculous meningitis (ICD10)  
A17.1+ Meningeal tuberculoma (ICD10)  
A17.8+ Other tuberculosis of nervous system (ICD10)  
A17.9+ Tuberculosis of nervous system, unspecified (ICD10)  
A18.0+ Tuberculosis of bones and joints (ICD10)  
A18.1 Tuberculosis of genitourinary system (ICD10)  
A18.1+ Tuberculosis of genitourinary system (ICD10)  
A18.2 Tuberculous peripheral lymphadenopathy (ICD10)  
A18.3+ (no description found)  
A18.4 Tuberculosis of skin and subcutaneous tissue (ICD10)  
A18.5+ Tuberculosis of eye (ICD10)  
A18.6+ Tuberculosis of (inner) (middle) ear (ICD10)  
A18.7+ Tuberculosis of adrenal glands (ICD10)  
A18.8+ Tuberculosis of other specified organs (ICD10)  
A19.0 Acute miliary tuberculosis of a single specified site  
A19.1 Acute miliary tuberculosis of multiple sites

A19.2 Acute miliary tuberculosis, unspecified (ICD10)  
 A19.8 Other miliary tuberculosis (ICD10)  
 A19.9 Miliary tuberculosis, unspecified (ICD10)  
 A20.0 Bubonic plague (ICD10)  
 A20.1 Cellulocutaneous plague (ICD10)  
 A20.2 Pneumonic plague (ICD10)  
 A20.3 Plague meningitis  
 A20.7 Septicemic plague (ICD10)  
 A20.8 Other forms of plague (ICD10)  
 A20.9 Plague, unspecified (ICD10)  
 A21.0 Ulceroglandular tularemia (ICD10)  
 A21.1 Oculoglandular tularemia (ICD10)  
 A21.2 Pulmonary tularemia (ICD10)  
 A21.3 Gastrointestinal tularemia (ICD10)  
 A21.7 Generalized tularaemia  
 A21.8 Other forms of tularemia (ICD10)  
 A21.9 Tularemia, unspecified (ICD10)  
 A22.0 Cutaneous anthrax (ICD10)  
 A22.1 Pulmonary anthrax (ICD10)  
 A22.2 Gastrointestinal anthrax (ICD10)  
 A22.7 Anthrax sepsis (ICD10)  
 A22.8 Other forms of anthrax (ICD10)  
 A22.9 Anthrax, unspecified (ICD10)  
 A23.0 Brucellosis due to *Brucella melitensis* (ICD10)  
 A23.1 Brucellosis due to *Brucella abortus* (ICD10)  
 A23.2 Brucellosis due to *Brucella suis* (ICD10)  
 A23.3 Brucellosis due to *Brucella canis* (ICD10)  
 A23.8 Other brucellosis (ICD10)  
 A23.9 Brucellosis, unspecified (ICD10)  
 A24.0 Glanders (ICD10)  
 A24.1 Acute and fulminating melioidosis  
 A24.2 Subacute and chronic melioidosis  
 A24.3 Other melioidosis  
 A24.4 Melioidosis, unspecified (ICD10)  
 A25.0 Spirillosis (ICD10)  
 A25.1 Streptobacillosis (ICD10)  
 A25.9 Rat-bite fever, unspecified (ICD10)  
 A26.0 Cutaneous erysipeloid  
 A26.7 Erysipelothrix sepsis  
 A26.8 Other forms of erysipeloid  
 A26.9 Erysipeloid, unspecified (ICD10)  
 A27.0 Leptospirosis icterohemorrhagica (ICD10)  
 A27.8 Other forms of leptospirosis (ICD10)  
 A27.9 Leptospirosis, unspecified (ICD10)  
 A28.0 Pasteurellosis (ICD10)  
 A28.1 Cat-scratch disease (ICD10)  
 A28.2 Extraintestinal yersiniosis  
 A28.8 Other specified zoonotic bacterial diseases, not elsewhere classified (ICD10)  
 A28.9 Zoonotic bacterial disease, unspecified (ICD10)  
 A30.0 Indeterminate leprosy (ICD10)  
 A30.1 Tuberculoid leprosy (ICD10)  
 A30.2 Borderline tuberculoid leprosy  
 A30.3 Borderline leprosy (ICD10)  
 A30.4 Borderline lepromatous leprosy  
 A30.5 Lepromatous leprosy (ICD10)  
 A30.8 Other forms of leprosy (ICD10)  
 A30.9 Leprosy, unspecified (ICD10)  
 A31.0 Pulmonary mycobacterial infection (ICD10)  
 A31.1 Cutaneous mycobacterial infection (ICD10)  
 A31.8 Other mycobacterial infections (ICD10)

A31.9 Mycobacterial infection, unspecified (ICD10)  
 A32.0 Cutaneous listeriosis  
 A32.1 Listerial meningitis and meningoencephalitis  
 A32.7 Listerial sepsis  
 A32.8 Other forms of listeriosis  
 A32.9 Listeriosis, unspecified (ICD10)  
 A33 Tetanus neonatorum (ICD10)  
 A34 Obstetrical tetanus  
 A35 Other tetanus (ICD10)  
 A36.0 Pharyngeal diphtheria (ICD10)  
 A36.1 Nasopharyngeal diphtheria (ICD10)  
 A36.2 Laryngeal diphtheria (ICD10)  
 A36.3 Cutaneous diphtheria (ICD10)  
 A36.8 Other diphtheria (ICD10)  
 A36.8+ (no description found)  
 A36.9 Diphtheria, unspecified (ICD10)  
 A37.0 Whooping cough due to Bordetella pertussis (ICD10)  
 A37.1 Whooping cough due to Bordetella parapertussis (ICD10)  
 A37.8 Whooping cough due to other Bordetella species (ICD10)  
 A37.9 Whooping cough, unspecified (ICD10)  
 A38 Scarlet fever (ICD10)  
 A39.0+ Meningococcal meningitis (ICD10)  
 A39.1+ Waterhouse-Friderichsen syndrome (ICD10)  
 A39.2 Acute meningococcaemia  
 A39.3 Chronic meningococcaemia  
 A39.4 Meningococemia, unspecified (ICD10)  
 A39.5 Meningococcal heart disease  
 A39.8 Other meningococcal infections (ICD10)  
 A39.8+Other meningococcal infections  
 A39.9 Meningococcal infection, unspecified (ICD10)  
 A40.0 Sepsis due to streptococcus, group A  
 A40.1 Sepsis due to streptococcus, group B  
 A40.2 Sepsis due to streptococcus, group D  
 A40.3 Sepsis due to Streptococcus pneumoniae (ICD10)  
 A40.8 Other streptococcal sepsis  
 A40.9 Streptococcal sepsis, unspecified (ICD10)  
 A41.0 Sepsis due to Staphylococcus aureus  
 A41.1 Sepsis due to other specified staphylococcus  
 A41.2 Sepsis due to unspecified staphylococcus (ICD10)  
 A41.3 Sepsis due to Hemophilus influenzae (ICD10)  
 A41.4 Sepsis due to anaerobes (ICD10)  
 A41.51 Sepsis due to Escherichia coli [E. Coli] (ICD10)  
 A41.52 Sepsis due to Pseudomonas (ICD10)  
 A41.58 Sepsis due to other Gram-negative organisms (ICD10)  
 A41.8 Other specified septicaemia (ICD10)  
 A41.9 Sepsis, unspecified (ICD10)  
 A42.0 Pulmonary actinomycosis (ICD10)  
 A42.1 Abdominal actinomycosis (ICD10)  
 A42.2 Cervicofacial actinomycosis (ICD10)  
 A42.7 Actinomycotic sepsis  
 A42.8 Other forms of actinomycosis (ICD10)  
 A42.9 Actinomycosis, unspecified (ICD10)  
 A43.0 Pulmonary nocardiosis  
 A43.1 Cutaneous nocardiosis  
 A43.8 Other forms of nocardiosis  
 A43.9 Nocardiosis, unspecified  
 A44.0 Systemic bartonellosis  
 A44.1 Cutaneous and mucocutaneous bartonellosis  
 A44.8 Other forms of bartonellosis  
 A44.9 Bartonellosis, unspecified (ICD10)

A46 Erysipelas (ICD10)  
 A48.0 Gas gangrene (ICD10)  
 A48.1 Legionnaires disease  
 A48.2 Nonpneumonic Legionnaires disease  
 A48.3 Toxic shock syndrome  
 A48.4 Brazilian purpuric fever  
 A48.8 Other specified bacterial diseases (ICD10)  
 A49.0 Staphylococcal infection, unspecified site  
 A49.1 Streptococcal infection, unspecified site  
 A49.2 Haemophilus influenza infection, unspecified site  
 A49.3 Mycoplasma infection, unspecified site  
 A49.8 Other bacterial infections of unspecified site  
 A49.9 Bacterial infection, unspecified (ICD10)  
 A50.0 Early congenital syphilis, symptomatic (ICD10)  
 A50.1 Early congenital syphilis, latent (ICD10)  
 A50.2 Early congenital syphilis, unspecified (ICD10)  
 A50.3 Late congenital syphilitic ophthalmopathy (ICD10)  
 A50.4 Late congenital neurosyphilis [juvenile neurosyphilis] (ICD10)  
 A50.5 Other late congenital syphilis, symptomatic (ICD10)  
 A50.6 Late congenital syphilis, latent (ICD10)  
 A50.7 Late congenital syphilis, unspecified (ICD10)  
 A50.9 Congenital syphilis, unspecified (ICD10)  
 A51.0 Primary genital syphilis (ICD10)  
 A51.1 Primary anal syphilis (ICD10)  
 A51.2 Primary syphilis of other sites (ICD10)  
 A51.3 Secondary syphilis of skin and mucous membranes (ICD10)  
 A51.3+ (no description found)  
 A51.4 Other secondary syphilis (ICD10)  
 A51.5 Early syphilis, latent (ICD10)  
 A51.9 Early syphilis, unspecified  
 A52.0+ Cardiovascular syphilis (I98.0\*) (ICD10)  
 A52.1 Symptomatic neurosyphilis (ICD10)  
 A52.1+ (no description found)  
 A52.2 Asymptomatic neurosyphilis (ICD10)  
 A52.3 Neurosyphilis, unspecified  
 A52.7 Other symptomatic late syphilis (ICD10)  
 A52.7+ (no description found)  
 A52.8 Late syphilis, latent (ICD10)  
 A52.9 Late syphilis, unspecified (ICD10)  
 A53.0 Latent syphilis, unspecified as early or late (ICD10)  
 A53.9 Syphilis, unspecified (ICD10)  
 A54.0 Gonococcal infection of lower genitourinary tract without periurethral or accessory gland abscess (ICD10)  
 A54.1 Gonococcal infection of lower genitourinary tract with periurethral and accessory gland abscess (ICD10)  
 A54.2+ Gonococcal pelviperitonitis and other gonococcal genitourinary infections (ICD10)  
 A54.3 Gonococcal infection of eye (ICD10)  
 A54.3+ (no description found)  
 A54.4+ Gonococcal infection of musculoskeletal system (ICD10)  
 A54.5 Gonococcal pharyngitis (ICD10)  
 A54.6 Gonococcal infection of anus and rectum (ICD10)  
 A54.8 Other gonococcal infections (ICD10)  
 A54.8+ (no description found)  
 A54.9 Gonococcal infection, unspecified  
 A55 Chlamydial lymphogranuloma (venereum) (ICD10)  
 A56.0 Chlamydial infection of lower genitourinary tract (ICD10)  
 A56.1 Chlamydial infection of pelviperitoneum and other genitourinary organs (ICD10)  
 A56.2 Chlamydial infection of genitourinary tract, unspecified (ICD10)  
 A56.3 Chlamydial infection of anus and rectum (ICD10)  
 A56.4 Chlamydial infection of pharynx (ICD10)  
 A56.8 Sexually transmitted chlamydial infection of other sites (ICD10)



A57 Chancroid (ICD10)  
 A58 Granuloma inguinale (ICD10)  
 A59.0 Urogenital trichomoniasis (ICD10)  
 A59.0+ (no description found)  
 A59.8 Trichomoniasis of other sites (ICD10)  
 A59.9 Trichomoniasis, unspecified (ICD10)  
 A60.0 Herpesviral infection of genitalia and urogenital tract (ICD10)  
 A60.1 Herpesviral infection of perianal skin and rectum  
 A60.9 Anogenital herpesviral infection, unspcified  
 A63.0 Anogenital (venereal) warts (ICD10)  
 A63.8 Other specified predominantly sexually transmitted diseases (ICD10)  
 A64 Unspecified sexually transmitted disease (ICD10)  
 A65 Nonvenereal syphilis (ICD10)  
 A66.0 Initial lesions of yaws (ICD10)  
 A66.1 Multiple papillomata and wet crab yaws (ICD10)  
 A66.2 Other early skin lesions of yaws (ICD10)  
 A66.3 Hyperkeratosis of yaws (ICD10)  
 A66.4 Gummata and ulcers of yaws (ICD10)  
 A66.5 Gangosa (ICD10)  
 A66.6 Bone and joint lesions of yaws (ICD10)  
 A66.7 Other manifestations of yaws (ICD10)  
 A66.8 Latent yaws (ICD10)  
 A66.9 Yaws, unspecified (ICD10)  
 A67.0 Primary lesions of pinta (ICD10)  
 A67.1 Intermediate lesions of pinta (ICD10)  
 A67.2 Late lesions of pinta  
 A67.3 Mixed lesions of pinta (ICD10)  
 A67.9 Pinta, unspecified (ICD10)  
 A68.0 Louse-borne relapsing fever (ICD10)  
 A68.1 Tick-borne relapsing fever (ICD10)  
 A68.9 Relapsing fever, unspecified (ICD10)  
 A69.0 Necrotizing ulcerative stomatitis  
 A69.1 Other Vincents infections (ICD10)  
 A69.2 Lyme disease (ICD10)  
 A69.8 Other specified spirochetal infections (ICD10)  
 A69.9 Spirochetal infection, unspecified (ICD10)  
 A70 Chlamydia psittaci infections (ICD10)  
 A70+ (no description found)  
 A71.0 Initial stage of trachoma (ICD10)  
 A71.1 Active stage of trachoma (ICD10)  
 A71.9 Trachoma, unspecified (ICD10)  
 A74.0+ Chlamydial conjunctivitis (ICD10)  
 A74.8 Other chlamydial diseases (ICD10)  
 A74.8+ (no description found)  
 A74.9 Chlamydial infection, unspecified (ICD10)  
 A75.0 Epidemic louse-borne typhus fever due to Rickettsia prowazekii  
 A75.1 Recrudescence typhus [Brills disease] (ICD10)  
 A75.2 Typhus fever due to Rickettsia typhi (ICD10)  
 A75.3 Typhus fever due to Rickettsia tsutsugamushi (ICD10)  
 A75.9 Typhus fever, unspecified (ICD10)  
 A77.0 Spotted fever due to Rickettsia rickettsii (ICD10)  
 A77.1 Spotted fever due to Rickettsia conorii (ICD10)  
 A77.2 Spotted fever due to Rickettsia siberica (ICD10)  
 A77.3 Spotted fever due to Rickettsia australis (ICD10)  
 A77.8 Other spotted fevers (ICD10)  
 A77.9 Spotted fever, unspecified (ICD10)  
 A78 Q fever (ICD10)  
 A79.0 Trench fever (ICD10)  
 A79.1 Rickettsialpox due to Rickettsia akari (ICD10)  
 A79.8 Other specified rickettsioses (ICD10)

A79.9 Rickettsiosis, unspecified (ICD10)  
 A80.1 Acute paralytic poliomyelitis, wild virus, imported  
 A80.2 Acute paralytic poliomyelitis, wild virus, indigenous  
 A80.3 Acute paralytic poliomyelitis, other and unspecified (ICD10)  
 A80.4 Acute nonparalytic poliomyelitis (ICD10)  
 A80.9 Acute poliomyelitis, unspecified (ICD10)  
 A81.0 Creutzfeldt-Jakob disease (ICD10)  
 A81.1 Subacute sclerosing panencephalitis (ICD10)  
 A81.2 Progressive multifocal leukoencephalopathy (ICD10)  
 A81.8 Other atypical virus infections of central nervous system (ICD10)  
 A81.9 Atypical virus infection of central nervous system, unspecified  
 A82.0 Sylvatic rabies  
 A82.1 Urban rabies  
 A82.9 Rabies, unspecified (ICD10)  
 A83.0 Japanese encephalitis (ICD10)  
 A83.1 Western equine encephalitis (ICD10)  
 A83.2 Eastern equine encephalitis (ICD10)  
 A83.3 St Louis encephalitis (ICD10)  
 A83.4 Australian encephalitis (ICD10)  
 A83.5 California encephalitis (ICD10)  
 A83.6 Rocio virus disease  
 A83.8 Other mosquito-borne viral encephalitis (ICD10)  
 A83.9 Mosquito-borne viral encephalitis, unspecified (ICD10)  
 A84.0 Far Eastern tick-borne encephalitis [Russian spring-summer encephalitis] (ICD10)  
 A84.1 Central European tick-borne encephalitis (ICD10)  
 A84.8 Other tick-borne viral encephalitis (ICD10)  
 A84.9 Tick-borne viral encephalitis, unspecified (ICD10)  
 A85.0 Enteroviral encephalitis  
 A85.1 Adenoviral encephalitis  
 A85.2 Arthropod-borne viral encephalitis, unspecified (ICD10)  
 A85.8 Other specified viral encephalitis  
 A86 Unspecified viral encephalitis  
 A87.0+ Enteroviral meningitis (ICD10)  
 A87.1+ Adenoviral meningitis (ICD10)  
 A87.2 Lymphocytic choriomeningitis (ICD10)  
 A87.8 Other viral meningitis  
 A87.9 Viral meningitis, unspecified  
 A88.0 Enteroviral exanthematous fever  
 A88.8 Other specified viral infections of central nervous system (ICD10)  
 A89 Unspecified viral infection of central nervous system (ICD10)  
 A90 Dengue fever [classical dengue] (ICD10)  
 A91 Dengue haemorrhagic fever  
 A92.0 Chikungunya virus disease  
 A92.1 O'nyong-nyong fever  
 A92.2 Venezuelan equine fever (ICD10)  
 A92.3 West Nile virus infection  
 A92.4 Rift Valley fever  
 A92.8 Other specified mosquito-borne viral fevers (ICD10)  
 A92.9 Mosquito-borne viral fever, unspecified  
 A93.0 Oropouche virus disease  
 A93.1 Sandfly fever (ICD10)  
 A93.2 Colorado tick fever (ICD10)  
 A93.8 Other specified arthropod-borne viral fevers (ICD10)  
 A94 Unspecified arthropod-borne viral fever (ICD10)  
 A95.0 Sylvatic yellow fever (ICD10)  
 A95.1 Urban yellow fever (ICD10)  
 A95.9 Yellow fever, unspecified (ICD10)  
 A96.0 Junin haemorrhagic fever  
 A96.1 Machupo haemorrhagic fever  
 A96.2 Lassa fever

A96.8 Other arenaviral hemorrhagic fevers (ICD10)  
 A96.9 Arenaviral haemorrhagic fever, unspecified  
 A98.0 Crimean-Congo hemorrhagic fever (ICD10)  
 A98.1 Omsk hemorrhagic fever (ICD10)  
 A98.2 Kyasanur Forest disease (ICD10)  
 A98.3 Marburg virus disease  
 A98.4 Ebola virus disease  
 A98.5 Hemorrhagic fever with renal syndrome (ICD10)  
 A98.8 Other specified viral haemorrhagic fevers  
 A99 Unspecified viral haemorrhagic fever  
 B00.0 Eczema herpeticum (ICD10)  
 B00.1 Herpesviral vesicular dermatitis (ICD10)  
 B00.2 Herpesviral gingivostomatitis and pharyngotonsillitis (ICD10)  
 B00.3+ Herpesviral meningitis (ICD10)  
 B00.4+ Herpesviral encephalitis (ICD10)  
 B00.5+ Herpesviral ocular disease (ICD10)  
 B00.7 Disseminated herpesviral disease (ICD10)  
 B00.8 Other forms of herpesviral infection (ICD10)  
 B00.9 Herpesviral infection, unspecified (ICD10)  
 B01.0 Varicella meningitis  
 B01.1+ Varicella encephalitis (G05.1\*) (ICD10)  
 B01.2+ Varicella pneumonia (ICD10)  
 B01.8 Varicella with other complications (ICD10)  
 B01.9 Varicella without complication (ICD10)  
 B02.0 Zoster encephalitis  
 B02.1+ Zoster meningitis (ICD10)  
 B02.2+ Zoster with other nervous system involvement (ICD10)  
 B02.3+ Zoster ocular disease (ICD10)  
 B02.7 Disseminated zoster  
 B02.8 Zoster with other complications (ICD10)  
 B02.9 Zoster without complications (ICD10)  
 B03 Smallpox (ICD10)  
 B04 Monkeypox  
 B05.0+ Measles complicated by encephalitis (ICD10)  
 B05.1 Measles complicated by meningitis  
 B05.2+ Measles complicated by pneumonia (ICD10)  
 B05.3+ Measles complicated by otitis media (ICD10)  
 B05.4 Measles with intestinal complications  
 B05.8 Measles with other complications (ICD10)  
 B05.9 Measles without complication (ICD10)  
 B06.0+ Rubella with neurological complications (ICD10)  
 B06.8 Rubella with other complications (ICD10)  
 B06.9 Rubella without complication (ICD10)  
 B07 Viral warts (ICD10)  
 B08.0 Other orthopoxvirus infections (ICD10)  
 B08.1 Molluscum contagiosum (ICD10)  
 B08.2 Exanthema subitum [sixth disease]  
 B08.3 Erythema infectiosum [fifth disease] (ICD10)  
 B08.4 Enteroviral vesicular stomatitis with exanthem (ICD10)  
 B08.5 Enteroviral vesicular pharyngitis (ICD10)  
 B08.8 Other specified viral infections characterized by skin and mucous membrane lesions (ICD10)  
 B09 Unspecified viral infection characterized by skin and mucous membrane lesions (ICD10)  
 B15.0 Hepatitis A with hepatic coma (ICD10)  
 B15.9 Hepatitis A without hepatic coma (ICD10)  
 B16.0 Acute hepatitis B with delta-agent with hepatic coma (ICD10)  
 B16.1 Acute hepatitis B with delta-agent without hepatic coma (ICD10)  
 B16.2 Acute hepatitis B without delta-agent with hepatic coma (ICD10)  
 B16.9 Acute hepatitis B without delta-agent and without hepatic coma  
 B17.0 Acute delta-(super) infection of hepatitis B carrier (ICD10)  
 B17.1 Acute hepatitis C (ICD10)

B17.2 Acute hepatitis E (ICD10)  
 B17.8 Other specified acute viral hepatitis (ICD10)  
 B17.9 Acute viral hepatitis, unspecified  
 B18.0 Chronic viral hepatitis B with delta-agent (ICD10)  
 B18.1 Chronic viral hepatitis B without delta-agent (ICD10)  
 B18.2 Chronic viral hepatitis C (ICD10)  
 B18.8 Other chronic viral hepatitis  
 B18.9 Chronic viral hepatitis, unspecified  
 B19.0 Unspecified viral hepatitis with hepatic coma (ICD10)  
 B19.9 Unspecified viral hepatitis without hepatic coma (ICD10)  
 B20.0 HIV disease resulting in mycobacterial infection  
 B20.1 HIV disease resulting in other bacterial infections  
 B20.2 HIV disease resulting in cytomegaloviral disease  
 B20.3 HIV disease resulting in other viral infections  
 B20.4 HIV disease resulting in candidiasis  
 B20.5 HIV disease resulting in other mycoses  
 B20.6 HIV disease resulting in Pneumocystis jirovecii pneumonia  
 B20.7 HIV disease resulting in multiple infections  
 B20.8 HIV disease resulting in other infectious and parasitic diseases  
 B20.9 HIV disease resulting in unspecified infectious or parasitic disease  
 B21.0 HIV disease resulting in Kaposi sarcoma  
 B21.1 HIV disease resulting in Burkitt lymphoma  
 B21.2 HIV disease resulting in other types of non-Hodgkin lymphoma  
 B21.3 HIV disease resulting in other malignant neoplasms of lymphoid, haematopoietic and related tissue  
 B21.7 HIV disease resulting in multiple malignant neoplasms  
 B21.8 HIV disease resulting in other malignant neoplasms  
 B21.9 HIV disease resulting in unspecified malignant neoplasm  
 B22.0 HIV disease resulting in encephalopathy  
 B22.1 HIV disease resulting in lymphoid interstitial pneumonitis  
 B22.2 HIV disease resulting in wasting syndrome  
 B22.7 HIV disease resulting in multiple diseases classified elsewhere  
 B23.0 Acute HIV infection syndrome  
 B23.1 HIV disease resulting in (persistent) generalized lymphadenopathy  
 B23.2 HIV disease resulting in haematological and immunological abnormalities, not elsewhere classified  
 B23.8 HIV disease resulting in other specified conditions  
 B24 Unspecified human immunodeficiency virus [HIV] disease (ICD10)  
 B25.0 Cytomegaloviral pneumonitis  
 B25.1 Cytomegaloviral hepatitis  
 B25.2 Cytomegaloviral pancreatitis  
 B25.8 Other cytomegaloviral diseases  
 B25.9 Cytomegaloviral disease, unspecified (ICD10)  
 B26.0+ Mumps orchitis (ICD10)  
 B26.1+ Mumps meningitis (ICD10)  
 B26.2+ Mumps encephalitis (ICD10)  
 B26.3+ Mumps pancreatitis (ICD10)  
 B26.8 Mumps with other complications (ICD10)  
 B26.8+ (no description found)  
 B26.9 Mumps without complication (ICD10)  
 B27.0 Gammaherpesviral mononucleosis  
 B27.1 Cytomegaloviral mononucleosis  
 B27.8 Other infectious mononucleosis  
 B27.9 Infectious mononucleosis, unspecified (ICD10)  
 B30.0+ Keratoconjunctivitis due to adenovirus (ICD10)  
 B30.1+ Conjunctivitis due to adenovirus (ICD10)  
 B30.2+ (no description found)  
 B30.3+ Acute epidemic hemorrhagic conjunctivitis (enteroviral)  
 B30.8+ Other viral conjunctivitis (ICD10)  
 B30.9 Viral conjunctivitis, unspecified  
 B33.0 Epidemic myalgia (ICD10)  
 B33.1 Ross River disease

B33.2 Viral carditis  
 B33.3 Retrovirus infections, not elsewhere classified (ICD10)  
 B33.4 Hantavirus (cardio-) pulmonary syndrome  
 B33.8 Other specified viral diseases (ICD10)  
 B34.0 Adenovirus infection, unspecified (ICD10)  
 B34.1 Enterovirus infection, unspecified (ICD10)  
 B34.2 Coronavirus infection, unspecified site  
 B34.3 Parvovirus infection, unspecified site  
 B34.4 Papovavirus infection, unspecified (ICD10)  
 B34.8 Other viral infections of unspecified site (ICD10)  
 B34.9 Viral infection, unspecified (ICD10)  
 B35.0 Tinea barbae and tinea capitis (ICD10)  
 B35.1 Tinea unguium (ICD10)  
 B35.2 Tinea manuum (ICD10)  
 B35.3 Tinea pedis (ICD10)  
 B35.4 Tinea corporis (ICD10)  
 B35.5 Tinea imbricata  
 B35.6 Tinea cruris (ICD10)  
 B35.8 Other dermatophytoses (ICD10)  
 B35.9 Dermatophytosis, unspecified (ICD10)  
 B36.0 Pityriasis versicolor (ICD10)  
 B36.1 Tinea nigra (ICD10)  
 B36.2 White piedra (ICD10)  
 B36.3 Black piedra (ICD10)  
 B36.8 Other specified superficial mycoses (ICD10)  
 B36.9 Superficial mycosis, unspecified (ICD10)  
 B37.0 Candidal stomatitis (ICD10)  
 B37.1 Pulmonary candidiasis (ICD10)  
 B37.2 Candidiasis of skin and nail (ICD10)  
 B37.3+ Candidiasis of vulva and vagina (ICD10)  
 B37.4+ Candidiasis of other urogenital sites (ICD10)  
 B37.5+ Candidal meningitis (ICD10)  
 B37.6 Candidal endocarditis  
 B37.7 Candidal sepsis  
 B37.81 Candidal oesophagitis (ICD10)  
 B37.88 Candidiasis of other sites (ICD10)  
 B37.9 Candidiasis, unspecified (ICD10)  
 B38.0 Acute pulmonary coccidioidomycosis (ICD10)  
 B38.1 Chronic pulmonary coccidioidomycosis (ICD10)  
 B38.2 Pulmonary coccidioidomycosis, unspecified (ICD10)  
 B38.3 Cutaneous coccidioidomycosis (ICD10)  
 B38.4+ Coccidioidomycosis meningitis (ICD10)  
 B38.7 Disseminated coccidioidomycosis  
 B38.8 Other forms of coccidioidomycosis (ICD10)  
 B38.9 Coccidioidomycosis, unspecified (ICD10)  
 B39.0 Acute pulmonary histoplasmosis capsulati  
 B39.1 Chronic pulmonary histoplasmosis capsulati  
 B39.2 Pulmonary histoplasmosis capsulati, unspecified (ICD10)  
 B39.3 Disseminated histoplasmosis capsulati  
 B39.4 Histoplasmosis capsulati, unspecified (ICD10)  
 B39.5 Histoplasmosis duboisii (ICD10)  
 B39.9 Histoplasmosis, unspecified (ICD10)  
 B40.0 Acute pulmonary blastomycosis  
 B40.1 Chronic pulmonary blastomycosis  
 B40.2 Pulmonary blastomycosis, unspecified  
 B40.3 Cutaneous blastomycosis  
 B40.7 Disseminated blastomycosis  
 B40.8 Other forms of blastomycosis  
 B40.9 Blastomycosis, unspecified (ICD10)  
 B41.0 Pulmonary paracoccidioidomycosis

B41.7 Disseminated paracoccidioidomycosis  
 B41.8 Other forms of paracoccidioidomycosis  
 B41.9 Paracoccidioidomycosis, unspecified (ICD10)  
 B42.0+ Pulmonary sporotrichosis (ICD10)  
 B42.1 Lymphocutaneous sporotrichosis  
 B42.7 Disseminated sporotrichosis  
 B42.8 Other forms of sporotrichosis  
 B42.9 Sporotrichosis, unspecified  
 B43.0 Cutaneous chromomycosis  
 B43.1 Phaeomycotic brain abscess  
 B43.2 Subcutaneous phaeomycotic abscess and cyst  
 B43.8 Other forms of chromomycosis  
 B43.9 Chromomycosis, unspecified (ICD10)  
 B44.0 Invasive pulmonary aspergillosis  
 B44.1 Other pulmonary aspergillosis  
 B44.2 Tonsillary aspergillosis  
 B44.7 Disseminated aspergillosis  
 B44.8 Other forms of aspergillosis  
 B44.9 Aspergillosis, unspecified (ICD10)  
 B45.0 Pulmonary cryptococcosis  
 B45.1 Cerebral cryptococcosis  
 B45.2 Cutaneous cryptococcosis  
 B45.3 Osseous cryptococcosis  
 B45.7 Disseminated cryptococcosis  
 B45.8 Other forms of cryptococcosis  
 B45.9 Cryptococcosis, unspecified (ICD10)  
 B46.0 Pulmonary mucormycosis  
 B46.1 Rhinocerebral mucormycosis  
 B46.2 Gastrointestinal mucormycosis  
 B46.3 Cutaneous mucormycosis  
 B46.4 Disseminated mucormycosis  
 B46.5 Mucormycosis, unspecified  
 B46.8 Other zygomycoses  
 B46.9 Zygomycosis, unspecified (ICD10)  
 B47.0 Eumycetoma (ICD10)  
 B47.1 Actinomycetoma  
 B47.9 Mycetoma, unspecified (ICD10)  
 B48.0 Lobomycosis (ICD10)  
 B48.1 Rhinosporidiosis (ICD10)  
 B48.2 Allescheriasis (ICD10)  
 B48.3 Geotrichosis  
 B48.4 Penicillosis  
 B48.7 Opportunistic mycoses (ICD10)  
 B48.8 Other specified mycoses (ICD10)  
 B49 Unspecified mycosis  
 B50.0 Plasmodium falciparum malaria with cerebral complications  
 B50.8 Other severe and complicated Plasmodium falciparum malaria (ICD10)  
 B50.9 Plasmodium falciparum malaria, unspecified (ICD10)  
 B51.0 Plasmodium vivax malaria with rupture of spleen  
 B51.8 Plasmodium vivax malaria with other complications  
 B51.9 Plasmodium vivax malaria without complication (ICD10)  
 B52.0 Plasmodium malariae malaria with nephropathy  
 B52.8 Plasmodium malariae malaria with other complications  
 B52.9 Plasmodium malariae malaria without complication (ICD10)  
 B53.0 Plasmodium ovale malaria (ICD10)  
 B53.1 Malaria due to simian plasmodia  
 B53.8 Other malaria, not elsewhere classified (ICD10)  
 B54 Unspecified malaria (ICD10)  
 B55.0 Visceral leishmaniasis (ICD10)  
 B55.1 Cutaneous leishmaniasis (ICD10)

B55.2 Mucocutaneous leishmaniasis (ICD10)  
 B55.9 Leishmaniasis, unspecified (ICD10)  
 B56.0 Gambiense trypanosomiasis (ICD10)  
 B56.1 Rhodesiense trypanosomiasis (ICD10)  
 B56.9 African trypanosomiasis, unspecified (ICD10)  
 B57.0 Acute Chagas disease with heart involvement  
 B57.1 Acute Chagas disease without heart involvement (ICD10)  
 B57.2 Chagas disease (chronic) with heart involvement (ICD10)  
 B57.3 Chagas disease (chronic) with digestive system involvement  
 B57.4 Chagas disease (chronic) with nervous system involvement  
 B57.5 Chagas disease (chronic) with other organ involvement (ICD10)  
 B58.0+ Toxoplasma oculopathy (ICD10)  
 B58.1+ Toxoplasma hepatitis (ICD10)  
 B58.2+ Toxoplasma meningoencephalitis (ICD10)  
 B58.3+ Pulmonary toxoplasmosis (ICD10)  
 B58.8 Toxoplasmosis with other organ involvement (ICD10)  
 B58.9 Toxoplasmosis, unspecified (ICD10)  
 B59 Pneumocystosis (ICD10)  
 B60.0 Babesiosis (ICD10)  
 B60.1 Acanthamoebiasis  
 B60.2 Naegleriasis  
 B60.8 Other specified protozoal diseases  
 B64 Unspecified protozoal disease  
 B65.0 Schistosomiasis due to *Schistosoma haematobium* [urinary schistosomiasis] (ICD10)  
 B65.1 Schistosomiasis due to *Schistosoma mansoni* [intestinal schistosomiasis] (ICD10)  
 B65.2 Schistosomiasis due to *Schistosoma japonicum* (ICD10)  
 B65.3 Cercarial dermatitis (ICD10)  
 B65.8 Other schistosomiasis (ICD10)  
 B65.9 Schistosomiasis, unspecified (ICD10)  
 B66.0 Opisthorchiasis (ICD10)  
 B66.1 Clonorchiasis (ICD10)  
 B66.2 Dicrocoeliasis  
 B66.3 Fascioliasis (ICD10)  
 B66.4 Paragonimiasis (ICD10)  
 B66.5 Fasciolopsiasis (ICD10)  
 B66.8 Other specified fluke infections (ICD10)  
 B66.9 Fluke infection, unspecified (ICD10)  
 B67.0 *Echinococcus granulosus* infection of liver (ICD10)  
 B67.1 *Echinococcus granulosus* infection of lung (ICD10)  
 B67.2 *Echinococcus granulosus* infection of bone  
 B67.3 *Echinococcus granulosus* infection, other and multiple sites (ICD10)  
 B67.3+ (no description found)  
 B67.4 *Echinococcus granulosus* infection, unspecified (ICD10)  
 B67.5 *Echinococcus multilocularis* infection of liver (ICD10)  
 B67.6 *Echinococcus multilocularis* infection, other and multiple sites  
 B67.7 *Echinococcus multilocularis* infection, unspecified (ICD10)  
 B67.8 Echinococcosis, unspecified, of liver (ICD10)  
 B67.9 Echinococcosis, other and unspecified (ICD10)  
 B68.0 *Taenia solium* taeniasis (ICD10)  
 B68.1 *Taenia saginata* taeniasis (ICD10)  
 B68.9 Taeniasis, unspecified (ICD10)  
 B69.0 Cysticercosis of central nervous system  
 B69.1 Cysticercosis of eye  
 B69.8 Cysticercosis of other sites  
 B69.9 Cysticercosis, unspecified (ICD10)  
 B70.0 Diphyllbothriasis (ICD10)  
 B70.1 Sparganosis (ICD10)  
 B71.0 Hymenolepiasis (ICD10)  
 B71.1 Dipylidiasis  
 B71.8 Other specified cestode infections (ICD10)

B71.9 Cestode infection, unspecified (ICD10)  
 B72 Dracunculiasis (ICD10)  
 B73 Onchocerciasis (ICD10)  
 B74.0 Filariasis due to *Wuchereria bancrofti* (ICD10)  
 B74.1 Filariasis due to *Brugia malayi* (ICD10)  
 B74.2 Filariasis due to *Brugia timori*  
 B74.3 Loiasis (ICD10)  
 B74.4 Mansonelliasis (ICD10)  
 B74.8 Other filariases (ICD10)  
 B74.9 Filariasis, unspecified (ICD10)  
 B75 Trichinellosis (ICD10)  
 B76.0 Ancylostomiasis (ICD10)  
 B76.1 Necatoriasis (ICD10)  
 B76.8 Other hookworm diseases  
 B76.9 Hookworm disease, unspecified  
 B77.0 Ascariasis with intestinal complications  
 B77.8 Ascariasis with other complications  
 B77.9 Ascariasis, unspecified (ICD10)  
 B78.0 Intestinal strongyloidiasis  
 B78.1 Cutaneous strongyloidiasis  
 B78.7 Disseminated strongyloidiasis  
 B78.9 Strongyloidiasis, unspecified (ICD10)  
 B79 Trichuriasis (ICD10)  
 B80 Enterobiasis (ICD10)  
 B81.0 Anisakiasis (ICD10)  
 B81.1 Intestinal capillariasis (ICD10)  
 B81.2 Trichostrongyliasis (ICD10)  
 B81.3 Intestinal angiostrongyliasis  
 B81.4 Mixed intestinal helminthiasis (ICD10)  
 B81.8 Other specified intestinal helminthiasis (ICD10)  
 B82.0 Intestinal helminthiasis, unspecified (ICD10)  
 B82.9 Intestinal parasitism, unspecified (ICD10)  
 B83.0 Visceral larva migrans (ICD10)  
 B83.1 Gnathostomiasis (ICD10)  
 B83.2 Angiostrongyliasis due to *Parastrongylus cantonensis*  
 B83.3 Syngamiasis  
 B83.4 Internal hirudiniasis  
 B83.8 Other specified helminthiasis (ICD10)  
 B83.9 Helminthiasis, unspecified (ICD10)  
 B85.0 Pediculosis due to *Pediculus humanus capitis* (ICD10)  
 B85.1 Pediculosis due to *Pediculus humanus corporis* (ICD10)  
 B85.2 Pediculosis, unspecified (ICD10)  
 B85.3 Phthiriasis (ICD10)  
 B85.4 Mixed pediculosis and phthiriasis (ICD10)  
 B86 Scabies (ICD10)  
 B87.0 Cutaneous myiasis  
 B87.1 Wound myiasis  
 B87.2 Ocular myiasis  
 B87.3 Nasopharyngeal myiasis  
 B87.4 Aural myiasis  
 B87.8 Myiasis of other sites  
 B87.9 Myiasis, unspecified (ICD10)  
 B88.0 Other acariasis (ICD10)  
 B88.1 Tungiasis [sandflea infestation] (ICD10)  
 B88.2 Other arthropod infestations (ICD10)  
 B88.3 External hirudiniasis (ICD10)  
 B88.8 Other specified infestations (ICD10)  
 B88.9 Infestation, unspecified (ICD10)  
 B89 Unspecified parasitic disease (ICD10)  
 B95.0 *Streptococcus*, group A, as the cause of diseases classified elsewhere (ICD10)



B95.1 Streptococcus, group B, as the cause of diseases classified elsewhere (ICD10)  
 B95.2 Streptococcus, group D, as the cause of diseases classified elsewhere (ICD10)  
 B95.3 Streptococcus pneumonia as the cause of diseases classified elsewhere  
 B95.41 Streptococcus, group C, as the cause of diseases classified to other chapters (ICD10)  
 B95.42 Streptococcus, group G, as the cause of diseases classified to other chapters (ICD10)  
 B95.48 Streptococcus, other specified group, as the cause of diseases classified to other chapters (ICD10)  
 B95.5 Unspecified streptococcus as the cause of diseases classified to other chapters  
 B95.6 Staphylococcus aureus as the cause of diseases classified elsewhere  
 B95.7 Other staphylococcus as the cause of diseases classified elsewhere  
 B95.8 Unspecified staphylococcus as the cause of diseases classified elsewhere (ICD10)  
 B96.0 Mycoplasma pneumonia as the cause of diseases classified to other chapters  
 B96.1 Klebsiella pneumonia as the cause of diseases classified to other chapters  
 B96.2 Escherichia coli [E. coli ] as the cause of diseases classified elsewhere (ICD10)  
 B96.3 Hemophilus influenzae [H. influenzae] as the cause of diseases classified elsewhere (ICD10)  
 B96.4 Proteus (mirabilis) (morganii) as the cause of diseases classified elsewhere (ICD10)  
 B96.5 Pseudomonas (aeruginosa) (mallei) (pseudomallei) as the cause of diseases classified elsewhere (ICD10)  
 B96.6 Bacteroides fragilis [B. fragilis] as the cause of diseases classified elsewhere (ICD10)  
 B96.7 Clostridium perfringens [C. perfringens] as the cause of diseases classified elsewhere (ICD10)  
 B96.81 Helicobacter pylori [H. pylori] as the cause of diseases classified to other chapters (ICD10)  
 B96.88 Other and unspecified bacterial agents as the cause of diseases classified to other chapters (ICD10)  
 B97.0 Adenovirus as the cause of diseases classified to other chapters  
 B97.1 Enterovirus as the cause of diseases classified to other chapters  
 B97.2 Coronavirus as the cause of diseases classified to other chapters  
 B97.3 Retrovirus as the cause of diseases classified to other chapters  
 B97.4 Respiratory syncytial virus as the cause of diseases classified to other chapters  
 B97.5 Reovirus as the cause of diseases classified to other chapters  
 B97.6 Parvovirus as the cause of diseases classified to other chapters  
 B97.7 Papillomavirus as the cause of diseases classified to other chapters  
 B97.8 Other viral agents as the cause of diseases classified to other chapters  
 B98.0 Helicobacter pylori as the cause of diseases classified to other chapters  
 B98.1 Vibrio vulnificus as the cause of diseases classified to other chapters  
 B99 Other and unspecified infectious diseases (ICD10)  
 D59.3 Haemolytic-uraemic syndrome  
 G00.0 Haemophilus meningitis (ICD10)  
 G00.1 Pneumococcal meningitis (ICD10)  
 G00.1\* (no description found)  
 G00.2 Streptococcal meningitis (ICD10)  
 G00.3 Staphylococcal meningitis (ICD10)  
 G00.8 Other bacterial meningitis (ICD10)  
 G00.9 Bacterial meningitis, unspecified (ICD10)  
 G01 Meningitis in bacterial diseases classified elsewhere  
 G02.0\* Meningitis in viral diseases classified elsewhere (ICD10)  
 G02.1\* Meningitis in mycoses (ICD10)  
 G02.8\* Meningitis in other specified infectious and parasitic diseases classified elsewhere (ICD10)  
 G03.0 Nonpyogenic meningitis (ICD10)  
 G03.1 Chronic meningitis (ICD10)  
 G03.2 Benign recurrent meningitis  
 G03.8 Meningitis due to other specified causes  
 G03.9 Meningitis, unspecified (ICD10)  
 G04.0 Acute disseminated encephalitis (ICD10)  
 G04.1 Tropical spastic paraplegia  
 G04.2 Bacterial meningoencephalitis and meningomyelitis, not elsewhere classified  
 G04.8 Other encephalitis, myelitis and encephalomyelitis (ICD10)  
 G04.9 Encephalitis, myelitis and encephalomyelitis, unspecified (ICD10)  
 G05.0 Encephalitis, myelitis and encephalomyelitis in bacterial diseases classified elsewhere  
 G05.1\* Encephalitis, myelitis and encephalomyelitis in viral diseases classified elsewhere (ICD10)  
 G05.2\* Encephalitis, myelitis and encephalomyelitis in other infectious and parasitic diseases classified elsewhere (ICD10)

G05.8 Encephalitis, myelitis and encephalomyelitis in other diseases classified elsewhere  
 G06.0 Intracranial abscess and granuloma (ICD10)  
 G06.1 Intraspinal abscess and granuloma (ICD10)  
 G06.2 Extradural and subdural abscess, unspecified (ICD10)  
 G07 Intracranial and intraspinal abscess and granuloma in disease classified elsewhere (ICD10)  
 G08 Intracranial and intraspinal phlebitis and thrombophlebitis  
 G92 Toxic encephalopathy (ICD10)  
 G94.0 Hydrocephalus in infectious and parasitic diseases classified elsewhere  
 H00.0 Hordeolum and other deep inflammation of eyelid (ICD10)  
 H00.1 Chalazion (ICD10)  
 H01.0 Blepharitis (ICD10)  
 H01.8 Other specified inflammations of eyelid (ICD10)  
 H03.0\* Parasitic infestation of eyelid in diseases classified elsewhere (ICD10)  
 H03.1\* Involvement of eyelid in other infectious diseases classified elsewhere (ICD10)  
 H04.0 Dacryoadenitis (ICD10)  
 H06.1\* Parasitic infestation of orbit in diseases classified elsewhere (ICD10)  
 H10.0 Mucopurulent conjunctivitis (ICD10)  
 H10.2 Other acute conjunctivitis (ICD10)  
 H10.3 Acute conjunctivitis, unspecified (ICD10)  
 H10.5 Blepharoconjunctivitis (ICD10)  
 H13.0 Filarial infection of conjunctiva  
 H13.1\* Conjunctivitis in infectious and parasitic diseases classified elsewhere (ICD10)  
 H19.0 Scleritis and episcleritis in diseases classified elsewhere  
 H19.1 Herpesviral keratitis and keratoconjunctivitis  
 H19.2\* Keratitis and keratoconjunctivitis in other infectious and parasitic diseases classified elsewhere (ICD10)  
 H20.0 Acute and subacute iridocyclitis (ICD10)  
 H22.0 Iridocyclitis in infectious and parasitic diseases classified elsewhere  
 H32.0 Chorioretinal inflammation in infectious and parasitic diseases classified elsewhere  
 H44.0 Purulent endophthalmitis (ICD10)  
 H44.1 Other endophthalmitis (ICD10)  
 H45.1 Endophthalmitis in diseases classified elsewhere  
 H48.1 Retrobulbar neuritis in diseases classified elsewhere  
 H58.8 Other specified diseases of eye and adnexa in diseases classified elsewhere  
 H60.0 Abscess of external ear  
 H60.1 Cellulitis of external ear  
 H60.2 Malignant otitis externa  
 H60.3 Other infective otitis externa (ICD10)  
 H62.0 Otitis externa in bacterial diseases classified elsewhere  
 H62.1 Otitis externa in viral diseases classified elsewhere  
 H62.2\* Otitis externa in mycoses (ICD10)  
 H62.3 Otitis externa in other infectious and parasitic diseases classified elsewhere  
 H65.0 Acute serous otitis media (ICD10)  
 H65.1 Other acute nonsuppurative otitis media (ICD10)  
 H65.2 Chronic serous otitis media (ICD10)  
 H65.3 Chronic mucoid otitis media (ICD10)  
 H65.4 Other chronic nonsuppurative otitis media (ICD10)  
 H65.9 Nonsuppurative otitis media, unspecified (ICD10)  
 H66.0 Acute suppurative otitis media (ICD10)  
 H66.1 Chronic tubotympanic suppurative otitis media (ICD10)  
 H66.2 Chronic atticofacial suppurative otitis media (ICD10)  
 H66.3 Other chronic suppurative otitis media (ICD10)  
 H66.4 Suppurative otitis media, unspecified (ICD10)  
 H66.9 Otitis media, unspecified (ICD10)  
 H67.0 Otitis media in bacterial diseases classified elsewhere  
 H67.1 Otitis media in viral diseases classified elsewhere  
 H68.0 Eustachian salpingitis  
 H70.0 Acute mastoiditis (ICD10)  
 H70.1 Chronic mastoiditis (ICD10)  
 H70.2 Petrositis (ICD10)

H70.8 Other mastoiditis and related conditions (ICD10)  
 H70.9 Mastoiditis, unspecified (ICD10)  
 H72.0 Central perforation of tympanic membrane (ICD10)  
 H72.1 Attic perforation of tympanic membrane (ICD10)  
 H72.2 Other marginal perforations of tympanic membrane (ICD10)  
 H72.8 Other perforations of tympanic membrane (ICD10)  
 H72.9 Perforation of tympanic membrane, unspecified (ICD10)  
 H73.0 Acute myringitis  
 H75.0 Mastoiditis in infectious and parasitic diseases classified elsewhere  
 H83.0 Labyrinthitis  
 H92.1 Otorrhoea  
 H94.0 Acoustic neuritis in infectious and parasitic diseases classified elsewhere  
 I00 Rheumatic fever without heart involvement (ICD10)  
 I01.0 Acute rheumatic pericarditis  
 I01.1 Acute rheumatic endocarditis  
 I01.2 Acute rheumatic myocarditis  
 I01.8 Other acute rheumatic heart disease  
 I01.9 Acute rheumatic heart disease, unspecified  
 I30.1 Infective pericarditis  
 I32.0 Pericarditis in bacterial diseases classified elsewhere  
 I32.1 Pericarditis in other infectious and parasitic diseases classified elsewhere  
 I33.0 Acute and subacute infective endocarditis  
 I39.0 Mitral valve disorders in diseases classified elsewhere  
 I39.1 Aortic valve disorders in diseases classified elsewhere  
 I39.2 Tricuspid valve disorders in diseases classified elsewhere  
 I39.3 Pulmonary valve disorders in diseases classified elsewhere  
 I39.4 Multiple valve disorders in diseases classified elsewhere  
 I39.8 Endocarditis, valve unspecified, in diseases classified elsewhere  
 I40.0 Infective myocarditis  
 I41.0 Myocarditis in bacterial diseases classified elsewhere  
 I41.1 Myocarditis in viral diseases classified elsewhere  
 I41.2 Myocarditis in other infectious and parasitic diseases classified elsewhere  
 I43.0 Cardiomyopathy in diseases classified elsewhere  
 I52.0 Other heart disorders in bacterial diseases classified elsewhere  
 I52.1 Other heart disorders in other infectious and parasitic diseases classified elsewhere  
 I68.1 Cerebral arteritis in infectious and parasitic diseases classified elsewhere  
 I98.0 Cardiovascular syphilis  
 I98.1 Cardiovascular disorders in other infectious and parasitic diseases classified elsewhere  
 J00 Acute nasopharyngitis [common cold] (ICD10)  
 J01.0 Acute maxillary sinusitis (ICD10)  
 J01.1 Acute frontal sinusitis (ICD10)  
 J01.2 Acute ethmoidal sinusitis (ICD10)  
 J01.3 Acute sphenoidal sinusitis (ICD10)  
 J01.4 Acute pansinusitis  
 J01.8 Other acute sinusitis (ICD10)  
 J01.9 Acute sinusitis, unspecified (ICD10)  
 J02.0 Streptococcal pharyngitis (ICD10)  
 J02.8 Acute pharyngitis due to other specified organisms  
 J02.9 Acute pharyngitis, unspecified (ICD10)  
 J03.0 Streptococcal tonsillitis  
 J03.8 Acute tonsillitis due to other specified organisms  
 J03.9 Acute tonsillitis, unspecified (ICD10)  
 J04.0 Acute laryngitis (ICD10)  
 J04.1 Acute tracheitis (ICD10)  
 J04.2 Acute laryngotracheitis (ICD10)  
 J05.0 Acute obstructive laryngitis [croup] (ICD10)  
 J05.1 Acute epiglottitis (ICD10)  
 J06.0 Acute laryngopharyngitis (ICD10)  
 J06.8 Other acute upper respiratory infections of multiple sites (ICD10)  
 J06.9 Acute upper respiratory infection, unspecified (ICD10)

J09 Influenza due to certain identified influenza virus  
 J10.0 Influenza with pneumonia, influenza virus identified (ICD10)  
 J10.1 Influenza due to other influenza virus with respiratory manifestations (ICD10)  
 J10.8 Influenza with other manifestations, influenza virus identified  
 J11 Influenza, virus not identified (ICD10)  
 J11.0 Influenza with pneumonia, virus not identified (ICD10)  
 J11.1 Influenza with other respiratory manifestations, virus not identified (ICD10)  
 J11.8 Influenza with other manifestations, virus not identified (ICD10)  
 J12.0 Adenoviral pneumonia (ICD10)  
 J12.1 Respiratory syncytial virus pneumonia (ICD10)  
 J12.2 Parainfluenza virus pneumonia (ICD10)  
 J12.3 Human metapneumovirus pneumonia  
 J12.8 Other viral pneumonia (ICD10)  
 J12.9 Viral pneumonia, unspecified (ICD10)  
 J13 Pneumonia due to Streptococcus pneumoniae (ICD10)  
 J14 Pneumonia due to Hemophilus influenzae (ICD10)  
 J15.0 Pneumonia due to Klebsiella pneumoniae (ICD10)  
 J15.1 Pneumonia due to Pseudomonas (ICD10)  
 J15.2 Pneumonia due to staphylococcus (ICD10)  
 J15.3 Pneumonia due to streptococcus, group B (ICD10)  
 J15.4 Pneumonia due to other streptococci (ICD10)  
 J15.5 Pneumonia due to Escherichia coli (ICD10)  
 J15.6 Pneumonia due to other aerobic Gram-negative bacteria (ICD10)  
 J15.7 Pneumonia due to Mycoplasma pneumoniae (ICD10)  
 J15.8 Pneumonia due to other specified bacteria (ICD10)  
 J15.9 Unspecified bacterial pneumonia (ICD10)  
 J16.0 Chlamydial pneumonia  
 J16.8 Pneumonia due to other specified infectious organisms (ICD10)  
 J17.0\* Pneumonia in bacterial diseases classified elsewhere (ICD10)  
 J17.1\* Pneumonia in viral diseases classified elsewhere (ICD10)  
 J17.2\* Pneumonia in mycoses (ICD10)  
 J17.3 Pneumonia in parasitic diseases  
 J17.8\* Pneumonia in other diseases classified elsewhere (ICD10)  
 J18.0 Bronchopneumonia, unspecified organism (ICD10)  
 J18.1 Lobar pneumonia, unspecified  
 J18.8 Other pneumonia, unspecified organism (ICD10)  
 J18.9 Pneumonia, unspecified  
 J20.0 Acute bronchitis due to Mycoplasma pneumoniae (ICD10)  
 J20.1 Acute bronchitis due to Hemophilus influenzae (ICD10)  
 J20.2 Acute bronchitis due to streptococcus (ICD10)  
 J20.3 Acute bronchitis due to coxsackievirus (ICD10)  
 J20.4 Acute bronchitis due to parainfluenza virus (ICD10)  
 J20.5 Acute bronchitis due to respiratory syncytial virus (ICD10)  
 J20.6 Acute bronchitis due to rhinovirus (ICD10)  
 J20.7 Acute bronchitis due to echovirus (ICD10)  
 J20.8 Acute bronchitis due to other specified organisms (ICD10)  
 J20.9 Acute bronchitis, unspecified (ICD10)  
 J21.0 Acute bronchiolitis due to respiratory syncytial virus  
 J21.1 Acute bronchiolitis due to human megapneumovirus  
 J21.8 Acute bronchiolitis due to other specified organisms  
 J21.9 Acute bronchiolitis, unspecified (ICD10)  
 J22 Unspecified acute lower respiratory infection (ICD10)  
 J32.0 Chronic maxillary sinusitis (ICD10)  
 J32.1 Chronic frontal sinusitis (ICD10)  
 J32.2 Chronic ethmoidal sinusitis (ICD10)  
 J32.3 Chronic sphenoidal sinusitis (ICD10)  
 J32.4 Chronic pansinusitis  
 J32.8 Other chronic sinusitis (ICD10)  
 J32.9 Chronic sinusitis, unspecified (ICD10)  
 J34.0 Abscess, furuncle and carbuncle of nose

J35.0 Chronic tonsillitis (ICD10)  
 J36 Peritonsillar abscess (ICD10)  
 J39.0 Retropharyngeal and parapharyngeal abscess (ICD10)  
 J39.1 Other abscess of pharynx (ICD10)  
 J39.2 Other diseases of pharynx (ICD10)  
 J40 Bronchitis, not specified as acute or chronic (ICD10)  
 J41.0 Simple chronic bronchitis (ICD10)  
 J41.1 Mucopurulent chronic bronchitis (ICD10)  
 J41.8 Mixed simple and mucopurulent chronic bronchitis  
 J42 Unspecified chronic bronchitis (ICD10)  
 J44.0 Chronic obstructive pulmonary disease with acute lower respiratory infection  
 J47 Bronchiectasis (ICD10)  
 J65 Pneumoconiosis associated with tuberculosis  
 J85.0 Gangrene and necrosis of lung  
 J85.1 Abscess of lung with pneumonia  
 J85.2 Abscess of lung without pneumonia (ICD10)  
 J85.3 Abscess of mediastinum  
 J86.0 Pyothorax with fistula (ICD10)  
 J86.9 Pyothorax without fistula (ICD10)  
 J99.8 Respiratory disorders in other diseases classified elsewhere  
 K04.4 Acute apical periodontitis of pulpal origin (ICD10)  
 K04.5 Chronic apical periodontitis (ICD10)  
 K04.6 Periapical abscess with sinus (ICD10)  
 K04.7 Periapical abscess without sinus (ICD10)  
 K05.2 Acute periodontitis (ICD10)  
 K05.3 Chronic periodontitis (ICD10)  
 K05.4 Periodontosis (ICD10)  
 K11.3 Abscess of salivary gland (ICD10)  
 K12.2 Cellulitis and abscess of mouth (ICD10)  
 K52.8 Other specified noninfective gastroenteritis and colitis (ICD10)  
 K61.0 Anal abscess  
 K61.1 Rectal abscess  
 K61.2 Anorectal abscess  
 K61.3 Ischiorectal abscess  
 K61.4 Intrashincteric abscess  
 K63.0 Abscess of intestine (ICD10)  
 K65.0 Generalized (acute) peritonitis (ICD10)  
 K65.8 Other peritonitis (ICD10)  
 K65.9 Peritonitis, unspecified (ICD10)  
 K67.0 Chlamydial peritonitis  
 K67.1 Gonococcal peritonitis  
 K67.2 Syphilitic peritonitis  
 K67.3 Tuberculous peritonitis  
 K67.8\* Other disorders of peritoneum in infectious diseases classified elsewhere (ICD10)  
 K75.0 Abscess of liver (ICD10)  
 K75.1 Phlebitis of portal vein (ICD10)  
 K77.0\* Liver disorders in infectious and parasitic diseases classified elsewhere (ICD10)  
 K81.0 Acute cholecystitis  
 K87.1 Disorders of pancreas in diseases classified elsewhere  
 K90.8+ (no description found)  
 K93.0 Tuberculous disorders of intestines, peritoneum and mesenteric glands  
 K93.1 Megacolon in Chagas disease  
 L00 Staphylococcal scalded skin syndrome  
 L01.0 Impetigo [any organism] [any site] (ICD10)  
 L01.1 Impetiginization of other dermatoses  
 L02.0 Cutaneous abscess, furuncle and carbuncle of face (ICD10)  
 L02.1 Cutaneous abscess, furuncle and carbuncle of neck (ICD10)  
 L02.2 Cutaneous abscess, furuncle and carbuncle of trunk (ICD10)  
 L02.3 Cutaneous abscess, furuncle and carbuncle of buttock (ICD10)  
 L02.4 Cutaneous abscess, furuncle and carbuncle of limb (ICD10)

L02.8 Cutaneous abscess, furuncle and carbuncle of other sites (ICD10)  
 L02.9 Cutaneous abscess, furuncle and carbuncle, unspecified (ICD10)  
 L03.0 Cellulitis of finger and toe  
 L03.01 Cellulitis of finger (ICD10)  
 L03.02 Cellulitis of toe (ICD10)  
 L03.1 Cellulitis of other parts of limb  
 L03.10 Cellulitis of upper limb (ICD10)  
 L03.11 Cellulitis of lower limb (ICD10)  
 L03.2 Cellulitis of face (ICD10)  
 L03.3 Cellulitis of trunk (ICD10)  
 L03.8 Cellulitis of other sites (ICD10)  
 L03.9 Cellulitis, unspecified (ICD10)  
 L04.0 Acute lymphadenitis of face, head and neck  
 L04.1 Acute lymphadenitis of trunk  
 L04.2 Acute lymphadenitis of upper limb  
 L04.3 Acute lymphadenitis of lower limb  
 L04.8 Acute lymphadenitis of other sites  
 L04.9 Acute lymphadenitis, unspecified (ICD10)  
 L05.0 Pilonidal cyst with abscess (ICD10)  
 L05.9 Pilonidal cyst without abscess (ICD10)  
 L08.0 Pyoderma (ICD10)  
 L08.1 Erythrasma  
 L08.8 Other specified local infections of skin and subcutaneous tissue  
 L08.9 Local infection of the skin and subcutaneous tissue, unspecified  
 L13.0 Dermatitis herpetiformis (ICD10)  
 L30.3 Infective dermatitis  
 L54.0 Erythema marginatum in acute rheumatic fever  
 L88 Pyoderma gangrenosum  
 M00.0 Staphylococcal arthritis and polyarthritis  
 M00.1 Pneumococcal arthritis and polyarthritis  
 M00.2 Other streptococcal arthritis and polyarthritis  
 M00.8 Arthritis and polyarthritis due to other specified bacterial agents  
 M00.90 Pyogenic arthritis, unspecified, multiple sites (ICD10)  
 M00.91 Pyogenic arthritis, unspecified, shoulder region (ICD10)  
 M00.92 Pyogenic arthritis, unspecified, upper arm (ICD10)  
 M00.93 Pyogenic arthritis, unspecified, forearm (ICD10)  
 M00.94 Pyogenic arthritis, unspecified, hand (ICD10)  
 M00.95 Pyogenic arthritis, unspecified, pelvic region and thigh  
 M00.96 Pyogenic arthritis, unspecified, lower leg (ICD10)  
 M00.97 Pyogenic arthritis, unspecified, ankle and foot (ICD10)  
 M00.98 Pyogenic arthritis, unspecified, other site (ICD10)  
 M00.99 Pyogenic arthritis, unspecified, site unspecified (ICD10)  
 M01.0 Meningococcal arthritis  
 M01.1 Tuberculous arthritis  
 M01.2 Arthritis in Lyme disease  
 M01.30\* Arthritis in other bacterial diseases classified elsewhere, multiple sites (ICD10)  
 M01.31\* Arthritis in other bacterial diseases classified elsewhere, shoulder region (ICD10)  
 M01.32\* Arthritis in other bacterial diseases classified elsewhere, upper arm (ICD10)  
 M01.33\* Arthritis in other bacterial diseases classified elsewhere, forearm (ICD10)  
 M01.34\* Arthritis in other bacterial diseases classified elsewhere, hand (ICD10)  
 M01.35\* Arthritis in other bacterial diseases classified elsewhere, pelvic region and thigh (ICD10)  
 M01.36\* Arthritis in other bacterial diseases classified elsewhere, lower leg (ICD10)  
 M01.37\* Arthritis in other bacterial diseases classified elsewhere, ankle and foot (ICD10)  
 M01.38\* Arthritis in other bacterial diseases classified elsewhere, other site (ICD10)  
 M01.39\* Arthritis in other bacterial diseases classified elsewhere, site unspecified (ICD10)  
 M01.4 Rubella arthritis  
 M01.50\* Arthritis in other viral diseases classified elsewhere, multiple sites (ICD10)  
 M01.51\* Arthritis in other viral diseases classified elsewhere, shoulder region (ICD10)  
 M01.52\* Arthritis in other viral diseases classified elsewhere, upper arm (ICD10)  
 M01.53\* Arthritis in other viral diseases classified elsewhere, forearm (ICD10)

M01.54\* Arthritis in other viral diseases classified elsewhere, hand  
M01.55\* Arthritis in other viral diseases classified elsewhere, pelvic region and thigh (ICD10)  
M01.56\* Arthritis in other viral diseases classified elsewhere, lower leg (ICD10)  
M01.57\* Arthritis in other viral diseases classified elsewhere, ankle and foot (ICD10)  
M01.58\* Arthritis in other viral diseases classified elsewhere, other site (ICD10)  
M01.59\* Arthritis in other viral diseases classified elsewhere, site unspecified (ICD10)  
M01.60\* Arthritis in mycoses, multiple sites (B35-B49+) (ICD10)  
M01.61\* Arthritis in mycoses, shoulder region (B35-B49+) (ICD10)  
M01.62\* Arthritis in mycoses, upper arm (B35-B49+) (ICD10)  
M01.63\* Arthritis in mycoses, forearm (B35-B49+) (ICD10)  
M01.64\* Arthritis in mycoses, hand (B35-B49+) (ICD10)  
M01.65\* Arthritis in mycoses, pelvic region and thigh (B35-B49+)  
M01.66 Arthritis in mycoses, lower leg (B35-B49+) (ICD10)  
M01.67\* Arthritis in mycoses, ankle and foot (B35-B49+) (ICD10)  
M01.68 Arthritis in mycoses, other site (B35-B49+) (ICD10)  
M01.69\* Arthritis in mycoses, site unspecified (B35-B49+) (ICD10)  
M01.80\* Arthritis in other infectious and parasitic diseases classified elsewhere, multiple sites (ICD10)  
M01.81\* Arthritis in other infectious and parasitic diseases classified elsewhere, shoulder region (ICD10)  
M01.82\* Arthritis in other infectious and parasitic diseases classified elsewhere, upper arm (ICD10)  
M01.83 Arthritis in other infectious and parasitic diseases classified elsewhere, forearm (ICD10)  
M01.83\* Arthritis in other infectious and parasitic diseases classified elsewhere, forearm (ICD10)  
M01.84\* Arthritis in other infectious and parasitic diseases classified elsewhere, hand (ICD10)  
M01.85\* Arthritis in other infectious and parasitic diseases classified elsewhere, pelvic region and thigh (ICD10)  
  
M01.86\* Arthritis in other infectious and parasitic diseases classified elsewhere, lower leg (ICD10)  
M01.87\* Arthritis in other infectious and parasitic diseases classified elsewhere, ankle and foot (ICD10)  
M01.88\* Arthritis in other infectious and parasitic diseases classified elsewhere, other site (ICD10)  
M01.89\* Arthritis in other infectious and parasitic diseases classified elsewhere, site unspecified (ICD10)  
M46.2 Osteomyelitis of vertebra  
M46.3 Infection of intervertebral disc (pyogenic)  
M46.4 Discitis, unspecified  
M46.5 Other infective spondylopathies  
M49.0 Tuberculosis of spine  
M49.1 Brucella spondylitis  
M49.2 Enterobacterial spondylitis  
M49.3 Spondylopathy in other infectious and parasitic diseases classified elsewhere  
M60.0 Infective myositis  
M60.09 Infective myositis, multiple sites (ICD10)  
M63.0 Myositis in bacterial diseases classified elsewhere  
M63.1 Myositis in protozoal and parasitic infections classified elsewhere  
M63.2 Myositis in other infectious diseases classified elsewhere  
M65.0 Abscess of tendon sheath  
M65.1 Other infective (teno)synovitis  
M68.0 Synovitis and tenosynovitis in bacterial diseases classified elsewhere  
M71.0 Abscess of bursa  
M71.1 Other infective bursitis  
M72.6 Necrotizing fasciitis  
M72.8 Other fibroblastic disorders  
M73.0 Gonococcal bursitis  
M73.1 Syphilitic bursitis  
M86.0 Acute haematogenous osteomyelitis  
M86.10 Other acute osteomyelitis, unspecified site (ICD10)  
M86.11 Other acute osteomyelitis, shoulder region (ICD10)  
M86.12 Other acute osteomyelitis, upper arm (ICD10)  
M86.13 Other acute osteomyelitis, forearm (ICD10)  
M86.14 Other acute osteomyelitis, hand (ICD10)  
M86.15 Other acute osteomyelitis, pelvic region and thigh (ICD10)  
M86.16 Other acute osteomyelitis, lower leg (ICD10)  
M86.17 Other acute osteomyelitis, ankle and foot (ICD10)  
M86.18 Other acute osteomyelitis, other site (ICD10)

M86.19 Other acute osteomyelitis, multiple sites (ICD10)  
M86.2 Subacute osteomyelitis  
M86.4 Chronic osteomyelitis with draining sinus  
M86.5 Other chronic osteomyelitis  
M86.60 Other chronic osteomyelitis, unspecified site (ICD10)  
M86.67 Other chronic osteomyelitis, ankle and foot (ICD10)  
M86.68 Other chronic osteomyelitis, other site (ICD10)  
M86.69 Other chronic osteomyelitis, multiple sites (ICD10)  
M86.8 Other osteomyelitis  
M86.90 Unspecified osteomyelitis, multiple sites (ICD10)  
M86.91 Unspecified osteomyelitis, shoulder region (ICD10)  
M86.92 Unspecified osteomyelitis, upper arm (ICD10)  
M86.93 Unspecified osteomyelitis, forearm (ICD10)  
M86.94 Unspecified osteomyelitis, hand (ICD10)  
M86.95 Unspecified osteomyelitis, pelvic region and thigh (ICD10)  
M86.96 Unspecified osteomyelitis, lower leg (ICD10)  
M86.97 Unspecified osteomyelitis, ankle and foot (ICD10)  
M86.98 Unspecified osteomyelitis, other site (ICD10)  
M86.99 Unspecified osteomyelitis, site unspecified (ICD10)  
M90.0 Tuberculosis of bone  
M90.1 Periostitis in other infectious diseases classified elsewhere  
N08.0 Glomerular disorders in infectious and parasitic diseases classified elsewhere  
N08.8 Glomerular disorders in other diseases classified elsewhere  
N13.6 Pyonephrosis  
N15.1 Renal and perinephric abscess (ICD10)  
N15.9 Renal tubulo-interstitial disease, unspecified  
N16.0 Renal tubulo-interstitial disorders in infectious and parasitic diseases classified elsewhere  
N22.0 Urinary calculus in schistosomiasis  
N29.1 Other disorders of kidney and ureter in infectious and parasitic diseases classified elsewhere  
N30.0 Acute cystitis  
N30.8 Other cystitis, abscess of bladder (ICD10)  
N33.0 Tuberculous cystitis  
N33.8 Bladder disorders in other diseases classified elsewhere  
N34.0 Urethral abscess (ICD10)  
N35.1 Postinfective urethral stricture, not elsewhere classified (ICD10)  
N39.0 Urinary tract infection, site not specified (ICD10)  
N41.0 Acute prostatitis (ICD10)  
N41.2 Abscess of prostate (ICD10)  
N43.1 Infected hydrocele (ICD10)  
N45.0 Orchitis, epididymitis and epididymo-orchitis with abscess (ICD10)  
N45.9 Orchitis, epididymitis and epididymo-orchitis without abscess  
N51.0 Disorders of prostate in diseases classified elsewhere  
N51.1 Disorders of testis and epididymis in diseases classified elsewhere  
N51.2 Balanitis in diseases classified elsewhere  
N51.8 Other disorders of male genital organs in diseases classified elsewhere  
N61 Inflammatory disorders of breast  
N70.0 Acute salpingitis and oophoritis (ICD10)  
N73.0 Acute parametritis and pelvic cellulitis (ICD10)  
N73.1 Chronic parametritis and pelvic cellulitis (ICD10)  
N73.2 Unspecified parametritis and pelvic cellulitis  
N73.3 Female acute pelvic peritonitis (ICD10)  
N73.4 Female chronic pelvic peritonitis (ICD10)  
N73.5 Female pelvic peritonitis, unspecified  
N73.6 Female pelvic peritoneal adhesions (postinfective) (ICD10)  
N73.8 Other specified female pelvic inflammatory diseases (ICD10)  
N73.9 Female pelvic inflammatory disease, unspecified (ICD10)  
N74.0 Tuberculous infection of cervix uteri  
N74.1 Female tuberculous pelvic inflammatory disease  
N74.2 Female syphilitic pelvic inflammatory disease  
N74.3 Female gonococcal pelvic inflammatory disease



N74.4 Female chlamydial pelvic inflammatory disease  
 N74.8 Female pelvic inflammatory disorders in other diseases classified elsewhere  
 N75.0 Cyst of Bartholins gland (ICD10)  
 N75.1 Abscess of Bartholins gland (ICD10)  
 N76.0 Acute vaginitis (ICD10)  
 N76.4 Abscess of vulva (ICD10)  
 N76.6 Ulceration of vulva (ICD10)  
 N76.8 Other specified inflammation of vagina and vulva (ICD10)  
 N77.0 Ulceration of vulva in infectious and parasitic diseases classified elsewhere  
 N77.1\* Vaginitis, vulvitis and vulvovaginitis in infectious and parasitic diseases classified elsewhere (ICD10)  
 O03.0 Spontaneous abortion, incomplete, complicated by genital tract and pelvic infection (ICD10)  
 O03.5 Spontaneous abortion, complete or unspecified, complicated by genital tract and pelvic infection (ICD10)  
 O04.0 Medical abortion, incomplete, complicated by genital tract and pelvic infection (ICD10)  
 O04.5 Medical abortion, complete or unspecified, complicated by genital tract and pelvic infection (ICD10)  
 O05.0 Other abortion, incomplete, complicated by genital tract and pelvic infection (ICD10)  
 O05.5 Other abortion, complete or unspecified, complicated by genital tract and pelvic infection (ICD10)  
 O06.0 Unspecified abortion, incomplete, complicated by genital tract and pelvic infection (ICD10)  
 O06.5 Unspecified abortion, complete or unspecified, complicated by genital tract and pelvic infection (ICD10)  
 O07.0 Failed medical abortion, complicated by genital tract and pelvic infection  
 O07.5 Other and unspecified failed attempted abortion, complicated by genital tract and pelvic infection  
 O08.0 Genital tract and pelvic infection following ectopic and molar pregnancy (ICD10)  
 O23.0 Infections of kidney in pregnancy  
 O23.1 Infections of bladder in pregnancy  
 O23.2 Infections of urethra in pregnancy  
 O23.3 Infections of other parts of urinary tract in pregnancy  
 O23.4 Unspecified infection of urinary tract in pregnancy  
 O23.5 Infections of the genital tract in pregnancy  
 O23.9 Other and unspecified genitourinary tract infection in pregnancy  
 O26.4 Herpes gestationis  
 O41.1 Infection of amniotic sac and membranes (ICD10)  
 O75.3 Other infection during labor (ICD10)  
 O85 Puerperal sepsis (ICD10)  
 O86.0 Infection of obstetric surgical wound  
 O86.1 Other infection of genital tract following delivery  
 O86.2 Urinary tract infection following delivery  
 O86.3 Other genitourinary tract infections following delivery  
 O86.4 Pyrexia of unknown origin following delivery  
 O86.8 Other specified puerperal infections  
 O91.00 Infection of nipple associated with childbirth, without mention of attachment difficulty (ICD10)  
 O91.10 Abscess of breast associated with childbirth, without mention of attachment difficulty (ICD10)  
 O91.20 Nonpurulent mastitis associated with childbirth, without mention of attachment difficulty (ICD10)  
 O98.0 Tuberculosis complicating pregnancy, childbirth and the puerperium  
 O98.1 Syphilis complicating pregnancy, childbirth and the puerperium  
 O98.2 Gonorrhoea complicating pregnancy, childbirth and the puerperium  
 O98.3 Other infections with a predominantly sexual mode of transmission complicating pregnancy, childbirth and the puerperium  
 O98.4 Viral hepatitis complicating pregnancy, childbirth and the puerperium  
 O98.5 Other viral diseases complicating pregnancy, childbirth and the puerperium (ICD10)  
 O98.6 Protozoal diseases complicating pregnancy, childbirth and the puerperium (ICD10)  
 O98.7 Human immunodeficiency disease complicating pregnancy, childbirth and the puerperium  
 O98.8 Other maternal infectious and parasitic diseases complicating pregnancy, childbirth and the puerperium (ICD10)  
 O98.9 Unspecified maternal infectious or parasitic disease complicating pregnancy, childbirth and the puerperium (ICD10)  
 P00.2 Newborn (suspected to be) affected by maternal infectious and parasitic diseases (ICD10)  
 P02.7 Newborn (suspected to be) affected by chorioamnionitis (ICD10)  
 P23.0 Congenital pneumonia due to viral agent  
 P23.1 Congenital pneumonia due to Chlamydia

P23.2 Congenital pneumonia due to staphylococcus  
 P23.3 Congenital pneumonia due to staphylococcus, group B  
 P23.4 Congenital pneumonia due to Escherichia coli  
 P23.5 Congenital pneumonia due to Pseudomonas  
 P23.6 Congenital pneumonia due to other bacterial agents  
 P23.8 Congenital pneumonia due to other organisms  
 P23.9 Congenital pneumonia, unspecified  
 P35.0 Congenital rubella syndrome  
 P35.1 Congenital cytomegalovirus infection  
 P35.2 Congenital herpesviral [herpes simples] infection  
 P35.3 Congenital viral hepatitis  
 P35.8 Other congenital viral diseases  
 P35.9 Congenital viral disease, unspecified  
 P36.0 Sepsis of newborn due to streptococcus, group B  
 P36.1 Sepsis of newborn due to other and unspecified streptococci  
 P36.2 Sepsis of newborn due to Staphylococcus aureus  
 P36.3 Sepsis of newborn due to other and unspecified staphylococci  
 P36.4 Sepsis of newborn due to Escherichia coli  
 P36.5 Sepsis of newborn due to anaerobes  
 P36.8 Other bacterial sepsis of newborn  
 P36.9 Bacterial sepsis of newborn, unspecified  
 P37.0 Congenital tuberculosis  
 P37.1 Congenital toxoplasmosis  
 P37.2 Neonatal (disseminated) listeriosis  
 P37.3 Congenital falciparum malaria  
 P37.4 Other congenital malaria  
 P37.5 Neonatal candidiasis (ICD10)  
 P37.8 Other specified congenital infectious and parasitic diseases  
 P37.9 Congenital infectious and parasitic disease, unspecified  
 P38 Omphalitis of newborn with or without mild haemorrhage (ICD10)  
 P39.0 Neonatal infective mastitis (ICD10)  
 P39.1 Neonatal conjunctivitis and dacryocystitis (ICD10)  
 P39.2 Intra-amniotic infection of fetus, not elsewhere classified  
 P39.3 Neonatal urinary tract infection  
 P39.4 Neonatal skin infection  
 P39.8 Other specified infections specific to the perinatal period (ICD10)  
 P39.9 Infection specific to the perinatal period, unspecified  
 Z21 Asymptomatic human immunodeficiency virus [HIV] infection status

**Supplementary Table: ICD codes for invasive bacterial infection diagnostic group**

|        |                                 |
|--------|---------------------------------|
| 003.1  | SALMONELLA SEPTICEMIA (ICD9)    |
| 003.21 | SALMONELLA MENINGITIS (ICD9)    |
| 003.23 | SALMONELLA ARTHRITIS (ICD9)     |
| 003.24 | SALMONELLA OSTEOMYELITIS (ICD9) |
| 006.5  | AMEBIC BRAIN ABSCESS (ICD9)     |
| 013.00 | TB MENINGITIS-UNSPEC (ICD9)     |
| 013.01 | TB MENINGITIS-NO EXAM (ICD9)    |
| 013.02 | TB MENINGITIS-EXAM UNKN (ICD9)  |
| 013.03 | TB MENINGITIS-MICRO DX (ICD9)   |
| 013.04 | TB MENINGITIS-CULT DX (ICD9)    |
| 013.05 | TB MENINGITIS-HISTO DX (ICD9)   |
| 013.06 | TB MENINGITIS-OTH TEST (ICD9)   |
| 013.10 | TUBRCLMA MENINGES-UNSPEC (ICD9) |
| 013.11 | TUBRCLMA MENING-NO EXAM (ICD9)  |
| 013.12 | TUBRCLMA MENIN-EXAM UNKN (ICD9) |
| 013.13 | TUBRCLMA MENING-MICRO DX (ICD9) |
| 013.14 | TUBRCLMA MENING-CULT DX (ICD9)  |
| 013.15 | TUBRCLMA MENING-HISTO DX (ICD9) |
| 013.16 | TUBRCLMA MENING-OTH TEST (ICD9) |
| 013.20 | TUBERCULOMA BRAIN-UNSPEC (ICD9) |
| 013.21 | TUBRCLOMA BRAIN-NO EXAM (ICD9)  |
| 013.22 | TUBRCLMA BRAIN-EXAM UNKN (ICD9) |
| 013.23 | TUBRCLOMA BRAIN-MICRO DX (ICD9) |
| 013.24 | TUBRCLOMA BRAIN-CULT DX (ICD9)  |
| 013.25 | TUBRCLOMA BRAIN-HISTO DX (ICD9) |
| 013.26 | TUBRCLOMA BRAIN-OTH TEST (ICD9) |
| 013.30 | TB BRAIN ABSCESS-UNSPEC (ICD9)  |
| 013.31 | TB BRAIN ABSCESS-NO EXAM (ICD9) |
| 013.32 | TB BRAIN ABSC-EXAM UNKN (ICD9)  |
| 013.33 | TB BRAIN ABSC-MICRO DX (ICD9)   |
| 013.34 | TB BRAIN ABSCESS-CULT DX (ICD9) |
| 013.35 | TB BRAIN ABSC-HISTO DX (ICD9)   |
| 013.36 | TB BRAIN ABSC-OTH TEST (ICD9)   |
| 013.40 | TUBRCLMA SP CORD-UNSPEC (ICD9)  |
| 013.41 | TUBRCLMA SP CORD-NO EXAM (ICD9) |
| 013.42 | TUBRCLMA SP CD-EXAM UNKN (ICD9) |
| 013.43 | TUBRCLMA SP CRD-MICRO DX (ICD9) |
| 013.44 | TUBRCLMA SP CORD-CULT DX (ICD9) |
| 013.45 | TUBRCLMA SP CRD-HISTO DX (ICD9) |
| 013.46 | TUBRCLMA SP CRD-OTH TEST (ICD9) |
| 013.50 | TB SP CRD ABSCESS-UNSPEC (ICD9) |
| 013.51 | TB SP CRD ABSC-NO EXAM (ICD9)   |
| 013.52 | TB SP CRD ABSC-EXAM UNKN (ICD9) |
| 013.53 | TB SP CRD ABSC-MICRO DX (ICD9)  |
| 013.54 | TB SP CRD ABSC-CULT DX (ICD9)   |
| 013.55 | TB SP CRD ABSC-HISTO DX (ICD9)  |
| 013.56 | TB SP CRD ABSC-OTH TEST (ICD9)  |
| 013.60 | TB ENCEPHALITIS-UNSPEC (ICD9)   |
| 013.61 | TB ENCEPHALITIS-NO EXAM (ICD9)  |
| 013.62 | TB ENCEPHALIT-EXAM UNKN (ICD9)  |
| 013.63 | TB ENCEPHALITIS-MICRO DX (ICD9) |
| 013.64 | TB ENCEPHALITIS-CULT DX (ICD9)  |
| 013.65 | TB ENCEPHALITIS-HISTO DX (ICD9) |
| 013.66 | TB ENCEPHALITIS-OTH TEST (ICD9) |
| 013.80 | CNS TB NEC-UNSPEC (ICD9)        |
| 013.81 | CNS TB NEC-NO EXAM (ICD9)       |
| 013.82 | CNS TB NEC-EXAM UNKN (ICD9)     |
| 013.83 | CNS TB NEC-MICRO DX (ICD9)      |

013.84 CNS TB NEC-CULT DX (ICD9)  
013.85 CNS TB NEC-HISTO DX (ICD9)  
013.86 CNS TB NEC-OTH TEST (ICD9)  
013.90 CNS TB NOS-UNSPEC (ICD9)  
013.91 CNS TB NOS-NO EXAM (ICD9)  
013.92 CNS TB NOS-EXAM UNKN (ICD9)  
013.93 CNS TB NOS-MICRO DX (ICD9)  
013.94 CNS TB NOS-CULT DX (ICD9)  
013.95 CNS TB NOS-HISTO DX (ICD9)  
013.96 CNS TB NOS-OTH TEST (ICD9)  
015.00 TB OF VERTEBRA-UNSPEC (ICD9)  
015.01 TB OF VERTEBRA-NO EXAM (ICD9)  
015.02 TB OF VERTEBRA-EXAM UNKN (ICD9)  
015.03 TB OF VERTEBRA-MICRO DX (ICD9)  
015.04 TB OF VERTEBRA-CULT DX (ICD9)  
015.05 TB OF VERTEBRA-HISTO DX (ICD9)  
015.06 TB OF VERTEBRA-OTH TEST (ICD9)  
015.10 TB OF HIP-UNSPEC (ICD9)  
015.11 TB OF HIP-NO EXAM (ICD9)  
015.12 TB OF HIP-EXAM UNKN (ICD9)  
015.13 TB OF HIP-MICRO DX (ICD9)  
015.14 TB OF HIP-CULT DX (ICD9)  
015.15 TB OF HIP-HISTO DX (ICD9)  
015.16 TB OF HIP-OTH TEST (ICD9)  
015.20 TB OF KNEE-UNSPEC (ICD9)  
015.21 TB OF KNEE-NO EXAM (ICD9)  
015.22 TB OF KNEE-EXAM UNKN (ICD9)  
015.23 TB OF KNEE-MICRO DX (ICD9)  
015.24 TB OF KNEE-CULT DX (ICD9)  
015.25 TB OF KNEE-HISTO DX (ICD9)  
015.26 TB OF KNEE-OTH TEST (ICD9)  
015.50 TB OF LIMB BONES-UNSPEC (ICD9)  
015.51 TB LIMB BONES-NO EXAM (ICD9)  
015.52 TB LIMB BONES-EXAM UNKN (ICD9)  
015.53 TB LIMB BONES-MICRO DX (ICD9)  
015.54 TB LIMB BONES-CULT DX (ICD9)  
015.55 TB LIMB BONES-HISTO DX (ICD9)  
015.56 TB LIMB BONES-OTH TEST (ICD9)  
015.60 TB OF MASTOID-UNSPEC (ICD9)  
015.61 TB OF MASTOID-NO EXAM (ICD9)  
015.62 TB OF MASTOID-EXAM UNKN (ICD9)  
015.63 TB OF MASTOID-MICRO DX (ICD9)  
015.64 TB OF MASTOID-CULT DX (ICD9)  
015.65 TB OF MASTOID-HISTO DX (ICD9)  
015.66 TB OF MASTOID-OTH TEST (ICD9)  
015.70 TB OF BONE NEC-UNSPEC (ICD9)  
015.71 TB OF BONE NEC-NO EXAM (ICD9)  
015.72 TB OF BONE NEC-EXAM UNKN (ICD9)  
015.73 TB OF BONE NEC-MICRO DX (ICD9)  
015.74 TB OF BONE NEC-CULT DX (ICD9)  
015.75 TB OF BONE NEC-HISTO DX (ICD9)  
015.76 TB OF BONE NEC-OTH TEST (ICD9)  
015.80 TB OF JOINT NEC-UNSPEC (ICD9)  
015.81 TB OF JOINT NEC-NO EXAM (ICD9)  
015.82 TB JOINT NEC-EXAM UNKN (ICD9)  
015.83 TB OF JOINT NEC-MICRO DX (ICD9)  
015.84 TB OF JOINT NEC-CULT DX (ICD9)  
015.85 TB OF JOINT NEC-HISTO DX (ICD9)  
015.86 TB OF JOINT NEC-OTH TEST (ICD9)  
015.90 TB BONE/JOINT NOS-UNSPEC (ICD9)

015.91 TB BONE/JT NOS-NO EXAM (ICD9)  
 015.92 TB BONE/JT NOS-EXAM UNKN (ICD9)  
 015.93 TB BONE/JT NOS-MICRO DX (ICD9)  
 015.94 TB BONE/JT NOS-CULT DX (ICD9)  
 015.95 TB BONE/JT NOS-HISTO DX (ICD9)  
 015.96 TB BONE/JT NOS-OTH TEST (ICD9)  
 020.0 BUBONIC PLAGUE (ICD9)  
 020.2 SEPTICEMIC PLAGUE (ICD9)  
 020.8 OTHER TYPES OF PLAGUE (ICD9)  
 020.9 PLAGUE NOS (ICD9)  
 021.8 TULAREMIA NEC (ICD9)  
 021.9 TULAREMIA NOS (ICD9)  
 022.3 ANTHRAX SEPTICEMIA (ICD9)  
 023.0 BRUCELLA MELITENSIS (ICD9)  
 023.1 BRUCELLA ABORTUS (ICD9)  
 023.2 BRUCELLA SUIS (ICD9)  
 023.3 BRUCELLA CANIS (ICD9)  
 023.8 BRUCELLOSIS NEC (ICD9)  
 023.9 BRUCELLOSIS NOS (ICD9)  
 025 MELIOIDOSIS (ICD9)  
 026.0 SPIRILLARY FEVER (ICD9)  
 026.1 STREPTOBACILLARY FEVER (ICD9)  
 026.9 RAT-BITE FEVER NOS (ICD9)  
 027.0 LISTERIOSIS (ICD9)  
 031.2 DX DUE TO DISSEM MYCOBACT (Begin 1997) (ICD9)  
 036.1 MENINGOCOCC ENCEPHALITIS (ICD9)  
 036.2 MENINGOCOCCEMIA (ICD9)  
 036.3 MENINGOCOCC ADRENAL SYND (ICD9)  
 036.40 MENINGOCOCCAL CARDITIS UNSPECIFIED  
 036.41 MENINGOCOCCAL PERICARDITIS  
 036.42 MENINGOCOCCAL ENDOCARDITIS  
 036.43 MENINGOCOCCAL MYOCARDITIS  
 036.81 MENINGOCOCC OPTIC NEURIT (ICD9)  
 036.82 MENINGOCOCC ARTHROPATHY (ICD9)  
 036.89 MENINGOCOCCAL INFECT NEC (ICD9)  
 036.9 MENINGOCOCCAL INFECT NOS (ICD9)  
 038.0 STREPTOCOCCAL SEPTICEMIA (ICD9)  
 038.1 STAPHYLOCOCC SEPTICEMIA (End 1997) (ICD9)  
 038.10 STAPH SEPTICEMIA- UNSPEC (Begin 1997) (ICD9)  
 038.11 STAPH AUREUS SEPTICEMIA (Begin 1997) (ICD9)  
 038.12 (no description found)  
 038.19 OT STAPH SEPTICEMIA (Begin 1997) (ICD9)  
 038.2 PNEUMOCOCCAL SEPTICEMIA (ICD9)  
 038.3 ANAEROBIC SEPTICEMIA (ICD9)  
 038.40 GRAM-NEG SEPTICEMIA NOS (ICD9)  
 038.41 H. INFLUENAE SEPTICEMIA (ICD9)  
 038.42 E COLI SEPTICEMIA (ICD9)  
 038.43 PSEUDOMONAS SEPTICEMIA (ICD9)  
 038.44 SERRATIA SEPTICEMIA (ICD9)  
 038.49 GRAM-NEG SEPTICEMIA NEC (ICD9)  
 038.8 SEPTICEMIA NEC (ICD9)  
 038.9 SEPTICEMIA NOS (ICD9)  
 040.3 NECROBACILLOSIS (ICD9)  
 040.82 TOXIC SHOCK SYNDROME (Begin 2002) (ICD9)  
 041.02 GROUP B STREPTOCOCCUS (Begin 1992) (ICD9)  
 077.98 DIS OF CONJUNCT DUE TO CHLAMYDIAE (Begin 1993) (ICD9)  
 078.88 OTH SPEC DISEASE DUE TO CHLAMYDIAE (Begin 1993) (ICD9)  
 079.88 OTH SPEC CHLAMYDIAL INFECTION (Begin 1993) (ICD9)  
 079.98 CHLAMYDIAL INFECTION NOS (Begin 1993) (ICD9)  
 083.0 Q FEVER (ICD9)

083.1 TRENCH FEVER (ICD9)  
 083.2 RICKETTSIALPOX (ICD9)  
 083.8 RICKETTSIOSES NEC (ICD9)  
 083.9 RICKETTSIOSIS NOS (ICD9)  
 091.3 SECONDARY SYPH SKIN  
 091.4 SYPHILITIC ADENOPATHY  
 091.5 SYPHILITIC UVEITIS NOS  
 091.51 SYPHILITIC CHORIORETINITIS  
 091.52 SYPHILITIC IRIDOCYCLITIS  
 091.61 SYPHILITIC PERIOSTITIS  
 091.62 SYPHILITIC HEPATITIS  
 091.69 SECOND SYPH VISCERA NEC  
 091.7 SECOND SYPHILIS RELAPSE  
 091.81 ACUTE SYPHIL MENINGITIS  
 091.82 SYPHILITIC ALOPECIA  
 091.89 SECONDARY SYPHILIS NEC  
 091.9 SECONDARY SYPHILIS NOS  
 092.0 EARLY SYPH LATENT RELAPSE  
 092.9 EARLY SYPH LATENT NOS  
 093.0 AORTIC ANEURYSM-SYPHIL  
 093.1 SYPHILITIC AORTITIS  
 093.2 SYPHIL ENDOCARDITIS NOS  
 093.21 SYPHILITIC MITRAL VALVE  
 093.22 SYPHILITIC AORTIC VALVE  
 093.23 SYPHILITIC TRICUSPID VALVE  
 093.24 SYPHILITIC PULMONARY VALVE  
 093.81 SYPHILITIC PERICARDITIS  
 093.82 SYPHILITIC MYOCARDITIS  
 093.89 CARDIOVASCULAR SYPH NEC  
 093.9 CARDIOVASCULAR SYPH NOS  
 094.0 TABES DORSALIS  
 094.1 GENERAL PARESIS  
 094.2 SYPHILITIC MENINGITIS  
 094.3 ASYMPTOMATIC NEUROSYPHILIS  
 094.81 SYPHILITIC ENCEPHALITIS  
 094.82 SYPHILITIC PARKINSONISM  
 094.83 SYPH DISSEM RETINITIS  
 094.84 SYPHILITIC OPTIC ATROPHY  
 094.85 SYPH RETROBULB NEURITIS  
 094.86 SYPHIL ACOUSTIC NEURITIS  
 094.87 SYPH RUPT CEREB ANEURYSM  
 094.89 NEUROSYPHILIS NEC  
 094.9 NEUROSYPHILIS NOS  
 095.0 SYPHILITIC EPISCLERITIS  
 095.1 SYPHILIS OF LUNG  
 095.2 SYPHILITIC PERITONITIS  
 095.3 SYPHILIS OF LIVER  
 095.4 SYPHILIS OF KIDNEY  
 095.5 SYPHILIS OF BONE  
 095.6 SYPHILIS OF MUSCLE  
 095.7 SYPHILIS OF TENDON/BURSA  
 095.8 LATE SYMPT SYPHILIS NEC  
 095.9 LATE SYMPT SYPHILIS NOS  
 096 LATE SYPHILIS LATENT  
 097.0 LATE SYPHILIS NOS  
 097.1 LATENT SYPHILIS NOS  
 097.9 SYPHILIS NOS  
 098.40 GONOCOCCAL CONJUNCTIVITIS  
 098.41 GONOCOCCAL IRIDOCYCLITIS  
 098.42 GONOCOCCAL ENDOPHTHALMIA

098.43 GONOCOCCAL KERATITIS  
 098.49 GONOCOCCAL EYE NEC  
 098.50 GONOCOCCAL ARTHRITIS  
 098.51 GONOCOCCAL SYNOVITIS  
 098.52 GONOCOCCAL BURSITIS  
 098.53 GONOCOCCAL SPONDYLITIS  
 098.59 GC INFECT JOINT NEC  
 098.6 GONOCOCCAL INFEC PHARYNX  
 098.7 GC INFECT ANUS & RECTUM  
 098.81 GONOCOCCAL KERATOSIS  
 098.82 GONOCOCCAL MENINGITIS  
 098.83 GONOCOCCAL PERICARDITIS  
 098.84 GONOCOCCAL ENDOCARDITIS  
 098.85 GONOCOCCAL HEART DIS NEC  
 098.86 GONOCOCCAL PERITONITIS  
 098.89 GONOCOCCAL INF SITE NEC  
 320.0 HEMOPHILUS MENINGITIS (ICD9)  
 320.1 PNEUMOCOCCAL MENINGITIS (ICD9)  
 320.2 STREPTOCOCCAL MENINGITIS (ICD9)  
 320.3 STAPHYLOCOCC MENINGITIS (ICD9)  
 320.7 MENING IN OTH BACT DIS (ICD9)  
 320.8 BACTERIAL MENINGITIS NEC (Begin 1980 (ICD9)  
 320.81 ANAEROBIC MENINGITIS (Begin 1992) (ICD9)  
 320.82 GRAM NEG MENINGITIS NEC (Begin 1992) (ICD9)  
 320.89 OTH BACTER MENINGITIS (Begin 1992) (ICD9)  
 320.9 BACTERIAL MENINGITIS NOS (ICD9)  
 322.2 CHRONIC MENINGITIS (ICD9)  
 323.1 RICKETTSIAL ENCEPHALITIS (ICD9)  
 324.0 INTRACRANIAL ABSCESS (ICD9)  
 324.1 INTRASPINAL ABSCESS (ICD9)  
 324.9 CNS ABSCESS NOS (ICD9)  
 421.0 ACUTE AND SUBACUTE BACTERIAL ENDOCARDITIS  
 449 SEPTIC ARTERIAL EMBOLISM (Begin 2007) (ICD9)  
 519.2 MEDIASTINITIS (ICD9)  
 659.30 SEPTICEMIA IN LABOR-UNSP (ICD9)  
 659.31 SEPTICEM IN LABOR-DELIV (ICD9)  
 659.33 SEPTICEM IN LABOR-ANTEPA (ICD9)  
 711.00 PYOGEN ARTHRITIS-UNSPEC (ICD9)  
 711.01 PYOGEN ARTHRITIS-SHLDER (ICD9)  
 711.02 PYOGEN ARTHRITIS-UP/ARM (ICD9)  
 711.03 PYOGEN ARTHRITIS-FOREARM (ICD9)  
 711.04 PYOGEN ARTHRITIS-HAND (ICD9)  
 711.05 PYOGEN ARTHRITIS-PELVIS (ICD9)  
 711.06 PYOGEN ARTHRITIS-L/LEG (ICD9)  
 711.07 PYOGEN ARTHRITIS-ANKLE (ICD9)  
 711.08 PYOGEN ARTHRITIS NEC (ICD9)  
 711.09 PYOGEN ARTHRITIS-MULT (ICD9)  
 711.40 BACT ARTHRITIS-UNSPEC (ICD9)  
 711.41 BACT ARTHRITIS-SHLDER (ICD9)  
 711.42 BACT ARTHRITIS-UP/ARM (ICD9)  
 711.43 BACT ARTHRITIS-FOREARM (ICD9)  
 711.44 BACT ARTHRITIS-HAND (ICD9)  
 711.45 BACT ARTHRITIS-PELVIS (ICD9)  
 711.46 BACT ARTHRITIS-L/LEG (ICD9)  
 711.47 BACT ARTHRITIS-ANKLE (ICD9)  
 711.48 BACT ARTHRITIS NEC (ICD9)  
 711.49 BACT ARTHRITIS-MULT (ICD9)  
 730.00 AC OSTEOMYELITIS-UNSPEC (ICD9)  
 730.01 AC OSTEOMYELITIS-SHLDER (ICD9)  
 730.02 AC OSTEOMYELITIS-UP/ARM (ICD9)

730.03 AC OSTEOMYELITIS-FOREARM (ICD9)  
 730.04 AC OSTEOMYELITIS-HAND (ICD9)  
 730.05 AC OSTEOMYELITIS-PELVIS (ICD9)  
 730.06 AC OSTEOMYELITIS-L/LEG (ICD9)  
 730.07 AC OSTEOMYELITIS-ANKLE (ICD9)  
 730.08 AC OSTEOMYELITIS NEC (ICD9)  
 730.09 AC OSTEOMYELITIS-MULT (ICD9)  
 730.10 CHR OSTEOMYELITIS-UNSP (ICD9)  
 730.11 CHR OSTEOMYELIT-SHLDER (ICD9)  
 730.12 CHR OSTEOMYELIT-UP/ARM (ICD9)  
 730.13 CHR OSTEOMYELIT-FOREARM (ICD9)  
 730.14 CHR OSTEOMYELIT-HAND (ICD9)  
 730.15 CHR OSTEOMYELIT-PELVIS (ICD9)  
 730.16 CHR OSTEOMYELIT-L/LEG (ICD9)  
 730.17 CHR OSTEOMYELIT-ANKLE (ICD9)  
 730.18 CHR OSTEOMYELIT NEC (ICD9)  
 730.19 CHR OSTEOMYELIT-MULT (ICD9)  
 730.20 OSTEOMYELITIS NOS-UNSPEC (ICD9)  
 730.21 OSTEOMYELITIS NOS-SHLDER (ICD9)  
 730.22 OSTEOMYELITIS NOS-UP/ARM (ICD9)  
 730.23 OSTEOMYELIT NOS-FOREARM (ICD9)  
 730.24 OSTEOMYELITIS NOS-HAND (ICD9)  
 730.25 OSTEOMYELITIS NOS-PELVIS (ICD9)  
 730.26 OSTEOMYELITIS NOS-L/LEG (ICD9)  
 730.27 OSTEOMYELITIS NOS-ANKLE (ICD9)  
 730.28 OSTEOMYELIT NOS-OTH SITE (ICD9)  
 730.29 OSTEOMYELITIS NOS-MULT (ICD9)  
 730.80 BONE INFECT NEC-UNSPEC (ICD9)  
 730.81 BONE INFECT NEC-SHLDER (ICD9)  
 730.82 BONE INFECT NEC-UP/ARM (ICD9)  
 730.83 BONE INFECT NEC-FOREARM (ICD9)  
 730.84 BONE INFECT NEC-HAND (ICD9)  
 730.85 BONE INFECT NEC-PELVIS (ICD9)  
 730.86 BONE INFECT NEC-L/LEG (ICD9)  
 730.87 BONE INFECT NEC-ANKLE (ICD9)  
 730.88 BONE INFECT NEC-OTH SITE (ICD9)  
 730.89 BONE INFECT NEC-MULT (ICD9)  
 730.90 BONE INFEC NOS-UNSP SITE (ICD9)  
 730.91 BONE INFECT NOS-SHLDER (ICD9)  
 730.92 BONE INFECT NOS-UP/ARM (ICD9)  
 730.93 BONE INFECT NOS-FOREARM (ICD9)  
 730.94 BONE INFECT NOS-HAND (ICD9)  
 730.95 BONE INFECT NOS-PELVIS (ICD9)  
 730.96 BONE INFECT NOS-L/LEG (ICD9)  
 730.97 BONE INFECT NOS-ANKLE (ICD9)  
 730.98 BONE INFECT NOS-OTH SITE (ICD9)  
 730.99 BONE INFECT NOS-MULT (ICD9)  
 771.81 SEPTICEMIA [SEPSIS] OF NEWBORN (Begin 2002) (ICD9)  
 771.83 BACTEREMIA OF NEWBORN (Begin 2002) (ICD9)  
 785.52 SEPTIC SHOCK (Begin 2003) (ICD9)  
 790.7 BACTEREMIA NOS (ICD9)  
 A02.1 Salmonella sepsis (ICD10)  
 A17.0+ Tuberculous meningitis (ICD10)  
 A17.1+ Meningeal tuberculoma (ICD10)  
 A17.8+ Other tuberculosis of nervous system (ICD10)  
 A17.9+ Tuberculosis of nervous system, unspecified (ICD10)  
 A18.0+ Tuberculosis of bones and joints (ICD10)  
 A19.0 Acute miliary tuberculosis of a single specified site  
 A19.1 Acute miliary tuberculosis of multiple sites  
 A20.3 Plague meningitis



A20.7 Septicemic plague (ICD10)  
 A21.7 Generalized tularaemia  
 A22.7 Anthrax sepsis (ICD10)  
 A23.0 Brucellosis due to *Brucella melitensis* (ICD10)  
 A23.1 Brucellosis due to *Brucella abortus* (ICD10)  
 A23.2 Brucellosis due to *Brucella suis* (ICD10)  
 A23.3 Brucellosis due to *Brucella canis* (ICD10)  
 A23.8 Other brucellosis (ICD10)  
 A23.9 Brucellosis, unspecified (ICD10)  
 A24.1 Acute and fulminating melioidosis  
 A25.0 Spirillosis (ICD10)  
 A25.1 Streptobacillosis (ICD10)  
 A25.9 Rat-bite fever, unspecified (ICD10)  
 A32.1 Listerial meningitis and meningoencephalitis  
 A32.7 Listerial sepsis  
 A39.0+ Meningococcal meningitis (ICD10)  
 A39.1+ Waterhouse-Friderichsen syndrome (ICD10)  
 A39.2 Acute meningococcaemia  
 A39.3 Chronic meningococcaemia  
 A39.4 Meningococemia, unspecified (ICD10)  
 A39.5 Meningococcal heart disease  
 A39.8 Other meningococcal infections (ICD10)  
 A39.8+Other meningococcal infections  
 A39.9 Meningococcal infection, unspecified (ICD10)  
 A40.0 Sepsis due to streptococcus, group A  
 A40.1 Sepsis due to streptococcus, group B  
 A40.2 Sepsis due to streptococcus, group D  
 A40.3 Sepsis due to *Streptococcus pneumoniae* (ICD10)  
 A40.8 Other streptococcal sepsis  
 A40.9 Streptococcal sepsis, unspecified (ICD10)  
 A41.0 Sepsis due to *Staphylococcus aureus*  
 A41.1 Sepsis due to other specified staphylococcus  
 A41.2 Sepsis due to unspecified staphylococcus (ICD10)  
 A41.3 Sepsis due to *Hemophilus influenzae* (ICD10)  
 A41.4 Sepsis due to anaerobes (ICD10)  
 A41.51 Sepsis due to *Escherichia coli* [*E. Coli*] (ICD10)  
 A41.52 Sepsis due to *Pseudomonas* (ICD10)  
 A41.58 Sepsis due to other Gram-negative organisms (ICD10)  
 A41.8 Other specified septicaemia (ICD10)  
 A41.9 Sepsis, unspecified (ICD10)  
 A44.0 Systemic bartonellosis  
 A48.3 Toxic shock syndrome  
 A52.0+ Cardiovascular syphilis (I98.0\*) (ICD10)  
 A52.1 Symptomatic neurosyphilis (ICD10)  
 A52.1+ (no description found)  
 A52.2 Asymptomatic neurosyphilis (ICD10)  
 A52.3 Neurosyphilis, unspecified  
 A52.7 Other symptomatic late syphilis (ICD10)  
 A52.7+ (no description found)  
 A52.8 Late syphilis, latent (ICD10)  
 A65 Nonvenereal syphilis (ICD10)  
 A74.0 Chlamydial conjunctivitis (ICD10)  
 A74.8 Other chlamydial diseases (ICD10)  
 A78 Q fever (ICD10)  
 A79.0 Trench fever (ICD10)  
 A79.1 Rickettsialpox due to *Rickettsia akari* (ICD10)  
 A79.8 Other specified rickettsioses (ICD10)  
 A79.9 Rickettsiosis, unspecified (ICD10)  
 B95.1 *Streptococcus*, group B, as the cause of diseases classified elsewhere (ICD10)  
 G00.0 *Haemophilus meningitis* (ICD10)

G00.1 Pneumococcal meningitis (ICD10)  
 G00.1\* (no description found)  
 G00.2 Streptococcal meningitis (ICD10)  
 G00.3 Staphylococcal meningitis (ICD10)  
 G00.8 Other bacterial meningitis (ICD10)  
 G00.9 Bacterial meningitis, unspecified (ICD10)  
 G01 Meningitis in bacterial diseases classified elsewhere  
 G03.1 Chronic meningitis (ICD10)  
 G05.0 Encephalitis, myelitis and encephalomyelitis in bacterial diseases classified elsewhere  
 G06.0 Intracranial abscess and granuloma (ICD10)  
 G06.1 Intraspinal abscess and granuloma (ICD10)  
 G06.2 Extradural and subdural abscess, unspecified (ICD10)  
 G07 Intracranial and intraspinal abscess and granuloma in disease classified elsewhere (ICD10)  
 I30.1 Infective pericarditis  
 I32.0 Pericarditis in bacterial diseases classified elsewhere  
 I33.0 Acute and subacute infective endocarditis  
 I41.0 Myocarditis in bacterial diseases classified elsewhere  
 J39.0 Retropharyngeal and parapharyngeal abscess (ICD10)  
 J39.1 Other abscess of pharynx (ICD10)  
 J85.3 Abscess of mediastinum  
 M00.90 Pyogenic arthritis, unspecified, multiple sites (ICD10)  
 M00.91 Pyogenic arthritis, unspecified, shoulder region (ICD10)  
 M00.92 Pyogenic arthritis, unspecified, upper arm (ICD10)  
 M00.93 Pyogenic arthritis, unspecified, forearm (ICD10)  
 M00.94 Pyogenic arthritis, unspecified, hand (ICD10)  
 M00.95 Pyogenic arthritis, unspecified, pelvic region and thigh  
 M00.96 Pyogenic arthritis, unspecified, lower leg (ICD10)  
 M00.97 Pyogenic arthritis, unspecified, ankle and foot (ICD10)  
 M00.98 Pyogenic arthritis, unspecified, other site (ICD10)  
 M00.99 Pyogenic arthritis, unspecified, site unspecified (ICD10)  
 M01.0 Meningococcal arthritis  
 M01.1 Tuberculous arthritis  
 M46.2 Osteomyelitis of vertebra  
 M46.3 Infection of intervertebral disc (pyogenic)  
 M46.4 Discitis, unspecified  
 M46.5 Other infective spondylopathies  
 M49.0 Tuberculosis of spine  
 M49.1 Brucella spondylitis  
 M49.2 Enterobacterial spondylitis  
 M49.3 Spondylopathy in other infectious and parasitic diseases classified elsewhere  
 M72.6 Necrotizing fasciitis  
 M73.0 Gonococcal bursitis  
 M73.1 Syphilitic bursitis  
 M86.0 Acute haematogenous osteomyelitis  
 M86.10 Other acute osteomyelitis, unspecified site (ICD10)  
 M86.11 Other acute osteomyelitis, shoulder region (ICD10)  
 M86.12 Other acute osteomyelitis, upper arm (ICD10)  
 M86.13 Other acute osteomyelitis, forearm (ICD10)  
 M86.14 Other acute osteomyelitis, hand (ICD10)  
 M86.15 Other acute osteomyelitis, pelvic region and thigh (ICD10)  
 M86.16 Other acute osteomyelitis, lower leg (ICD10)  
 M86.17 Other acute osteomyelitis, ankle and foot (ICD10)  
 M86.18 Other acute osteomyelitis, other site (ICD10)  
 M86.19 Other acute osteomyelitis, multiple sites (ICD10)  
 M86.2 Subacute osteomyelitis  
 M86.4 Chronic osteomyelitis with draining sinus  
 M86.5 Other chronic osteomyelitis  
 M86.60 Other chronic osteomyelitis, unspecified site (ICD10)  
 M86.67 Other chronic osteomyelitis, ankle and foot (ICD10)  
 M86.68 Other chronic osteomyelitis, other site (ICD10)

M86.69 Other chronic osteomyelitis, multiple sites (ICD10)  
M86.8 Other osteomyelitis  
M86.90 Unspecified osteomyelitis, multiple sites (ICD10)  
M86.91 Unspecified osteomyelitis, shoulder region (ICD10)  
M86.92 Unspecified osteomyelitis, upper arm (ICD10)  
M86.93 Unspecified osteomyelitis, forearm (ICD10)  
M86.94 Unspecified osteomyelitis, hand (ICD10)  
M86.95 Unspecified osteomyelitis, pelvic region and thigh (ICD10)  
M86.96 Unspecified osteomyelitis, lower leg (ICD10)  
M86.97 Unspecified osteomyelitis, ankle and foot (ICD10)  
M86.98 Unspecified osteomyelitis, other site (ICD10)  
M86.99 Unspecified osteomyelitis, site unspecified (ICD10)  
M90.0 Tuberculosis of bone  
P36.0 Sepsis of newborn due to streptococcus, group B  
P36.1 Sepsis of newborn due to other and unspecified streptococci  
P36.2 Sepsis of newborn due to Staphylococcus aureus  
P36.3 Sepsis of newborn due to other and unspecified staphylococci  
P36.4 Sepsis of newborn due to Escherichia coli  
P36.5 Sepsis of newborn due to anaerobes  
P36.8 Other bacterial sepsis of newborn  
P36.9 Bacterial sepsis of newborn, unspecified  
P37.0 Congenital tuberculosis  
P37.2 Neonatal (disseminated) listeriosis

**Supplementary Table:** ICD codes for gastrointestinal infection diagnostic group

|        |                                               |
|--------|-----------------------------------------------|
| 001.0  | CHOLERA D/T VIB CHOLERAE (ICD9)               |
| 001.1  | CHOLERA D/T VIB EL TOR (ICD9)                 |
| 001.9  | CHOLERA NOS (ICD9)                            |
| 002.0  | TYPHOID FEVER (ICD9)                          |
| 002.1  | PARATYPHOID FEVER A (ICD9)                    |
| 002.2  | PARATYPHOID FEVER B (ICD9)                    |
| 002.3  | PARATYPHOID FEVER C (ICD9)                    |
| 002.9  | PARATYPHOID FEVER NOS (ICD9)                  |
| 003.0  | SALMONELLA ENTERITIS (ICD9)                   |
| 003.20 | LOCAL SALMONELLA INF NOS (ICD9)               |
| 003.29 | LOCAL SALMONELLA INF NEC (ICD9)               |
| 003.8  | SALMONELLA INFECTION NEC (ICD9)               |
| 003.9  | SALMONELLA INFECTION NOS (ICD9)               |
| 004.0  | SHIGELLA DYSENTERIAE (ICD9)                   |
| 004.1  | SHIGELLA FLEXNERI (ICD9)                      |
| 004.2  | SHIGELLA BOYDII (ICD9)                        |
| 004.3  | SHIGELLA SONNEI (ICD9)                        |
| 004.8  | SHIGELLA INFECTION NEC (ICD9)                 |
| 004.9  | SHIGELLOSIS NOS (ICD9)                        |
| 005.0  | STAPH FOOD POISONING (ICD9)                   |
| 005.1  | BOTULISM (ICD9)                               |
| 005.2  | FOOD POIS D/T C. PERFRIN (ICD9)               |
| 005.3  | FOOD POIS: CLOSTRID NEC (ICD9)                |
| 005.4  | FOOD POIS: V. PARAHAEM (ICD9)                 |
| 005.8  | BACT FOOD POISONING NEC (End 1995) (ICD9)     |
| 005.81 | FOOD POISONING VIBRIO (Begin 1995) (ICD9)     |
| 005.89 | OTH BACT FOOD POISONING (Begin 1995) (ICD9)   |
| 005.9  | FOOD POISONING NOS (ICD9)                     |
| 006.0  | AC AMEBIASIS W/O ABSCESS (ICD9)               |
| 006.1  | CHR AMEBIASIS W/O ABSCESES (ICD9)             |
| 006.2  | AMEBIC NONDYSENT COLITIS (ICD9)               |
| 006.3  | AMEBIC LIVER ABSCESS (ICD9)                   |
| 006.8  | AMEBIC INFECTION NEC                          |
| 006.9  | AMEBIASIS NOS (ICD9)                          |
| 007.0  | BALANTIDIASIS (ICD9)                          |
| 007.1  | GIARDIASIS (ICD9)                             |
| 007.2  | COCCIDIOSIS (ICD9)                            |
| 007.3  | INTEST TRICHOMONIASIS (ICD9)                  |
| 007.4  | OT PROTOZ INTEST DX- CRYP (Begin 1997) (ICD9) |
| 007.5  | CYCLOSPORIASIS (Begin 2000) (ICD9)            |
| 007.8  | PROTOZOAL INTEST DIS NEC (ICD9)               |
| 007.9  | PROTOZOAL INTEST DIS NOS (ICD9)               |
| 008.0  | E. COLI ENTERITIS (Begin 1980) (ICD9)         |
| 008.00 | E. COLI ENTERITIS-NOS (Begin 1992) (ICD9)     |
| 008.01 | E. COLI ENTERITIS-PATH (Begin 1992) (ICD9)    |
| 008.02 | E. COLI ENTERITIS-TOX (Begin 1992) (ICD9)     |
| 008.03 | E. COLI ENTERITIS-INVAS (Begin 1992) (ICD9)   |
| 008.04 | E. COLI ENTERITIS-HEMOR (Begin 1992) (ICD9)   |
| 008.09 | E. COLI ENTERITIS-OTHER (Begin 1992) (ICD9)   |
| 008.1  | ARIZONA ENTERITIS (ICD9)                      |
| 008.2  | AEROBACTER ENTERITIS (ICD9)                   |
| 008.3  | PROTEUS ENTERITIS (ICD9)                      |
| 008.41 | STAPHYLOCOCC ENTERITIS (ICD9)                 |
| 008.42 | PSEUDOMONAS ENTERITIS (ICD9)                  |
| 008.43 | CAMPYLOBACTER (Begin 1992) (ICD9)             |
| 008.44 | YERSINIA (Begin 1992) (ICD9)                  |
| 008.45 | CLOSTRIDIUM DIF (Begin 1992) (ICD9)           |
| 008.46 | OTHER ANAEROBES (Begin 1992) (ICD9)           |

008.47 OTH GRAM NEG BACT (Begin 1992) (ICD9)  
 008.49 BACTERIAL ENTERITIS NEC (ICD9)  
 008.5 BACTERIAL ENTERITIS NOS (ICD9)  
 008.6 VIRAL ENTERITIS NEC (Begin 1980) (ICD9)  
 008.61 ROTAVIRUS ENTERITIS (Begin 1992) (ICD9)  
 008.62 ADENOVIR ENTERITIS (Begin 1992) (ICD9)  
 008.63 NORWALK VIR ENTERITIS (Begin 1992) (ICD9)  
 008.64 SML ROUND VIR ENTERITIS (Begin 1992) (ICD9)  
 008.65 CALCIVIRUS ENTERITIS (Begin 1992) (ICD9)  
 008.66 ASTROVIRUS ENTERITIS (Begin 1992) (ICD9)  
 008.67 ENTERITIS NEC (Begin 1992) (ICD9)  
 008.69 ENTERITIS NOS (Begin 1992) (ICD9)  
 008.8 VIRAL ENTERITIS NOS (ICD9)  
 009.0 INFECTIOUS ENTERITIS NOS (ICD9)  
 009.1 ENTERITIS OF INFECT ORIG (ICD9)  
 009.2 INFECTIOUS DIARRHEA NOS (ICD9)  
 009.3 DIARRHEA OF INFECT ORIG (ICD9)  
 021.1 ENTERIC TULAREMIA (ICD9)  
 022.2 GASTROINTESTINAL ANTHRAX (ICD9)  
 032.83 DIPHTHERITIC PERITONITIS (ICD9)  
 039.2 ABDOMINAL ACTINOMYCOSIS (ICD9)  
 040.2 WHIPPLE-S DISEASE  
 041.86 HELICOBACTER PYLORI INFECTION (Begin 1995) (ICD9)  
 078.82 EPIDEMIC VOMITING SYND (ICD9)  
 112.85 CANDIDAL ENTERITIS (Begin 1992) (ICD9)  
 112.89 CANDIDIASIS SITE NEC (ICD9)  
 123.6 HYMENOLEPIASIS (ICD9)  
 123.9 CESTODE INFECTION NOS (ICD9)  
 126.0 ANCYLOSTOMA DUODENALE (ICD9)  
 126.9 ANCYLOSTOMIASIS NOS (ICD9)  
 127.1 ANISAKIASIS (ICD9)  
 127.2 STRONGYLOIDIASIS (ICD9)  
 558.9 NONINF GASTROENTERIT NEC (ICD9)  
 A00.0 Cholera due to *Vibrio cholerae* 01, biovar cholerae (ICD10)  
 A00.1 Cholera due to *Vibrio cholerae* 01, biovar eltor (ICD10)  
 A00.9 Cholera, unspecified (ICD10)  
 A01.0 Typhoid fever (ICD10)  
 A01.1 Paratyphoid fever A (ICD10)  
 A01.2 Paratyphoid fever B (ICD10)  
 A01.3 Paratyphoid fever C (ICD10)  
 A01.4 Paratyphoid fever, unspecified (ICD10)  
 A02.0 Salmonella enteritis (ICD10)  
 A02.2+ Localised salmonella infections (ICD10)  
 A02.8 Other specified salmonella infections (ICD10)  
 A02.9 Salmonella infection, unspecified (ICD10)  
 A03.0 Shigellosis due to *Shigella dysenteriae* (ICD10)  
 A03.1 Shigellosis due to *Shigella flexneri* (ICD10)  
 A03.2 Shigellosis due to *Shigella boydii* (ICD10)  
 A03.3 Shigellosis due to *Shigella sonnei* (ICD10)  
 A03.8 Other shigellosis (ICD10)  
 A03.9 Shigellosis, unspecified (ICD10)  
 A04.0 Enteropathogenic *Escherichia coli* infection (ICD10)  
 A04.1 Enterotoxigenic *Escherichia coli* infection (ICD10)  
 A04.2 Enteroinvasive *Escherichia coli* infection (ICD10)  
 A04.3 Enterohemorrhagic *Escherichia coli* infection (ICD10)  
 A04.4 Other intestinal *Escherichia coli* infections (ICD10)  
 A04.5 *Campylobacter* enteritis (ICD10)  
 A04.6 Enteritis due to *Yersinia enterocolitica* (ICD10)  
 A04.7 Enterocolitis due to *Clostridium difficile* (ICD10)  
 A04.8 Other specified bacterial intestinal infections (ICD10)

A04.9 Bacterial intestinal infection, unspecified (ICD10)  
 A05.0 Foodborne staphylococcal intoxication (ICD10)  
 A05.1 Botulism food poisoning (ICD10)  
 A05.2 Foodborne Clostridium perfringens [Clostridium welchii] intoxication (ICD10)  
 A05.3 Foodborne Vibrio parahaemolyticus intoxication (ICD10)  
 A05.4 Foodborne Bacillus cereus intoxication (ICD10)  
 A05.8 Other specified bacterial foodborne intoxications (ICD10)  
 A05.9 Bacterial foodborne intoxication, unspecified (ICD10)  
 A06.0 Acute amebic dysentery (ICD10)  
 A06.1 Chronic intestinal amebiasis (ICD10)  
 A06.2 Amebic nondysenteric colitis (ICD10)  
 A06.3 Amoeboma of intestine (ICD10)  
 A06.4 Amebic liver abscess (ICD10)  
 A06.9 Amebiasis, unspecified (ICD10)  
 A07.0 Balantidiasis (ICD10)  
 A07.1 Giardiasis [lambliasis] (ICD10)  
 A07.2 Cryptosporidiosis (ICD10)  
 A07.3 Isosporiasis (ICD10)  
 A07.8 Other specified protozoal intestinal diseases (ICD10)  
 A07.9 Protozoal intestinal disease, unspecified (ICD10)  
 A08.0 Rotaviral enteritis (ICD10)  
 A08.1 Acute gastroenteropathy due to Norwalk agent (ICD10)  
 A08.2 Adenoviral enteritis (ICD10)  
 A08.3 Other viral enteritis (ICD10)  
 A08.4 Viral intestinal infection, unspecified  
 A08.5 Other specified intestinal infections (ICD10)  
 A09 Infectious gastroenteritis and colitis, unspecified (ICD10)  
 A09.0 Other and unspecified gastroenteritis and colitis of infectious origin  
 A09.9 Gastroenteritis and colitis of unspecified origin  
 A21.3 Gastrointestinal tularemia (ICD10)  
 A22.2 Gastrointestinal anthrax (ICD10)  
 B37.88 Candidiasis of other sites (ICD10)  
 B71.0 Hymenolepiasis (ICD10)  
 B71.9 Cestode infection, unspecified (ICD10)  
 B76.0 Ancylostomiasis (ICD10)  
 B78.9 Strongyloidiasis, unspecified (ICD10)  
 B81.0 Anisakiasis (ICD10)  
 B96.81 Helicobacter pylori [H. pylori] as the cause of diseases classified to other chapters (ICD10)  
 K52.8 Other specified noninfective gastroenteritis and colitis (ICD10)

**Supplementary Table: ICD codes for lower respiratory infection diagnostic group**

003.22 SALMONELLA PNEUMONIA (ICD9)  
006.4 AMEBIC LUNG ABSCESS (ICD9)  
010.00 PRIM TB COMPLEX-UNSPEC (ICD9)  
010.01 PRIM TB COMPLEX-NO EXAM (ICD9)  
010.02 PRIM TB COMPLEX-EXM UNKN (ICD9)  
010.03 PRIM TB COMPLEX-MICRO DX (ICD9)  
010.04 PRIM TB COMPLEX-CULT DX (ICD9)  
010.05 PRIM TB COMPLEX-HISTO DX (ICD9)  
010.06 PRIM TB COMPLEX-OTH TEST (ICD9)  
010.10 PRIM TB PLEURISY-UNSPEC (ICD9)  
010.11 PRIM TB PLEURISY-NO EXAM (ICD9)  
010.12 PRIM TB PLEUR-EXAM UNKN (ICD9)  
010.13 PRIM TB PLEURIS-MICRO DX (ICD9)  
010.14 PRIM TB PLEURISY-CULT DX (ICD9)  
010.15 PRIM TB PLEURIS-HISTO DX (ICD9)  
010.16 PRIM TB PLEURIS-OTH TEST (ICD9)  
010.80 PRIM PROG TB NEC-UNSPEC  
010.81 PRIM PROG TB NEC-NO EXAM  
010.82 PRIM PR TIB NEC-EXAM UNKN  
010.83 PRIM PRG TB NEC-MICRO DX  
010.84 PRIM PROG TB NEC-CULT DX  
010.85 PRIM PRG TB NEC-HITO DX  
010.86 PRIM PRG TB NEC-OTH TEST  
010.90 PRIMARY TB NOS-UNSPEC  
010.91 PRIMARY TB NOS-NO EXAM  
010.92 PRIMARY TB NOS-EXAM UNKN  
010.93 PRIMARY TB NOS-MICRO DX  
010.94 PRIMARY TB NOS-CULT DX  
010.95 PRIMARY TB NOS-HISTO DX  
010.96 PRIMARY TB NOS-OTH TEST  
011.00 TB LUNG INFILTR-UNSPEC  
011.01 TB LUNG INFILTR-NO EXAM  
011.02 TB LUNG INFILTR-EXM UNKN  
011.03 TB LUNG INFILTR-MICRO DX  
011.04 TB LUNG INFILTR-CULT DX  
011.05 TB LUNG INFILTR-HISTO DX  
011.06 TB LUNG INFILTR-OTH TEST  
011.10 TB LUNG NODULAR-UNSPEC  
011.11 TB LUNG NODULAR-NO EXAM  
011.12 TB LUNG NODULAR-EXAM UNKN  
011.13 TB LUNG NODULAR-MICRO DX  
011.14 TB LUNG NODULAR-CULT DX  
011.15 TB LUNG NODULAR-HISTO DX  
011.16 TB LUNG NODULAR-OTH TEST  
011.20 TB LUNG W CAVITY-UNSPEC  
011.21 TB LUNG W CAVITY-NO EXAM  
011.22 TB LUNG W CAVITY-EXAM UNKN  
011.23 TB LUNG W CAVITY-MICRO DX  
011.24 TB LUNG W CAVITY-CULT DX  
011.25 TB LUNG W CAVITY-HISTO DX  
011.26 TB LUNG W CAVITY-OTH TEST  
011.30 TB OF BRONCHUS-UNSPEC  
011.31 TB OF BRONCHUS- NO EXAM  
011.32 TB OF BRONCHUS-EXAM UNKN  
011.33 TB OF BRONCHUS- MICRO DX  
011.34 TB OF BRONCHUS- CULT DX  
011.35 TB OF BRONCHUS- HISTO DX

011.36 TB OF BRONCHUS- OTH TEST  
011.40 TB LUNG FIBROSIS- UNSPEC  
011.41 TB LUNG FIBROSIS- NO EXAM  
011.42 TB LUNG FIBROSIS- EXAM UNKN  
011.43 TB LUNG FIBROSIS- MICRO DX  
011.44 TB LUNG FIBROSIS- CULT DX  
011.45 TB LUNG FIBROSIS- HISTO DX  
011.46 TB LUNG FIBROSIS- OTH TEST  
011.50 TB BRONCHIECTASIS- UNSPEC  
011.51 TB BRONCHIECTASIS- NO EXAM  
011.52 TB BRONCHIECTASIS- EXAM UNKN  
011.53 TB BRONCHIECTASIS- MICRO DX  
011.54 TB BRONCHIECTASIS- CULT DX  
011.55 TB BRONCHIECTASIS- HISTO DX  
011.56 TB BRONCHIECTASIS- OTH TEST  
011.60 TB PNEUMONIA- UNSPEC  
011.61 TB PNEUMONIA- NO EXAM  
011.62 TB PNEUMONIA- EXAM UNKN  
011.63 TB PNEUMONIA- MICRO DX  
011.64 TB PNEUMONIA- CULT DX  
011.65 TB PNEUMONIA- HISTO DX  
011.66 TB PNEUMONIA- OTH TEST  
011.70 TB PNEUMOTHORAX- UNSPEC  
011.71 TB PNEUMOTHORAX- NO EXAM  
011.72 TB PNEUMOTHORAX- EXAM UNKN  
011.73 TB PNEUMOTHORAX- MICRO DX  
011.74 TB PNEUMOTHORAX- CULT DX  
011.75 TB PNEUMOTHORAX- HISTO DX  
011.76 TB PNEUMOTHORAX- OTH TEST  
011.80 PULMONARY TB NEC- UNSPEC  
011.81 PULMONARY TB NEC- NO EXAM  
011.82 PULMONARY TB NEC- EXAM UNKN  
011.83 PULMONARY TB NEC- MICRO DX  
011.84 PULMONARY TB NEC- CULT DX  
011.85 PULMONARY TB NEC- HISTO DX  
011.86 PULMONARY TB NEC- OTH TEST  
011.90 PULMONARY TB NOS- UNSPEC  
011.91 PULMONARY TB NOS- NO EXAM  
011.92 PULMONARY TB NOS- EXAM UNKN  
011.93 PULMONARY TB NOS- MICRO DX  
011.94 PULMONARY TB NOS- CULT DX  
011.95 PULMONARY TB NOS- HISTO DX  
011.96 PULMONARY TB NOS- OTH TEST  
012.00 TB PLEURISY- UNSPEC  
012.01 TB PLEURISY- NO EXAM  
012.02 TB PLEURISY- EXAM UNKN  
012.03 TB PLEURISY- MICRO DX  
012.04 TB PLEURISY- CULT DX  
012.05 TB PLEURISY- HISTO DX  
012.06 TB PLEURISY- OTH TEST  
012.10 TB THORACIC NODES- UNSPEC  
012.11 TB THORACIC NODES- NO EXAM  
012.12 TB THORACIC NODES- EXAM UNKN  
012.13 TB THORACIC NODES- MICRO DX  
012.14 TB THORACIC NODES- CULT DX  
012.15 TB THORACIC NODES- HISTO DX  
012.16 TB THORACIC NODES- OTH TEST  
018.00 ACUTE MILIARY TB- UNSPEC  
018.01 ACUTE MILIARY TB- NO EXAM  
018.02 ACUTE MILIARY TB- EXAM UNKN



018.03 ACUTE MILIARY TB- MICRO DX  
 018.04 ACUTE MILIARY TB- CULT DX  
 018.05 ACUTE MILIARY TB- HISTO DX  
 018.06 ACUTE MILIARY TB- OTH TEST  
 018.80 MILIARY TB NEC- UNSPEC  
 018.81 MILIARY TB NEC- NO EXAM  
 018.82 MILIARY TB NEC- EXAM UNKN  
 018.83 MILIARY TB NEC- MICRO DX  
 018.84 MILIARY TB NEC- CULT DX  
 018.85 MILIARY TB NEC- HISTO DX  
 018.86 MILIARY TB NEC- OTH TEST  
 018.90 MILIARY TB NOS- UNSPEC  
 018.91 MILIARY TB NOS-NO EXAM  
 018.92 MILIARY TB NOS- EXAM UNKN  
 018.93 MILIARY TB NOS-MICRO DX  
 018.94 MILIARY TB NOS- CULT DX  
 018.95 MILIARY TB NOS-HISTO DX  
 018.96 MILIARY TB NOS- OTH TEST  
 020.3 PRIMARY PNEUMONIC PLAGUE (ICD9)  
 020.4 SECONDARY PNEUMON PLAGUE (ICD9)  
 020.5 PNEUMONIC PLAGUE NOS (ICD9)  
 021.2 PULMONARY TULAREMIA (ICD9)  
 022.1 PULMONARY ANTHRAX (ICD9)  
 024 GLANDERS  
 031.0 PULMONARY MYCOBACTERIA (ICD9)  
 033.0 BORDETELLA PERTUSSIS (ICD9)  
 033.1 BORDETELLA PARAPERTUSSIS (ICD9)  
 033.8 WHOOPING COUGH NEC (ICD9)  
 033.9 WHOOPING COUGH NOS (ICD9)  
 039.1 PULMONARY ACTINOMYCOSIS (ICD9)  
 052.1 VARICELLA PNEUMONITIS (ICD9)  
 055.1 POSTMEASLES PNEUMONIA (ICD9)  
 073.0 ORNITHOSIS PNEUMONIA (ICD9)  
 073.7 ORNITHOSIS COMPLICAT NEC (ICD9)  
 073.8 ORNITHOSIS COMPLICAT NOS (ICD9)  
 073.9 ORNITHOSIS NOS (ICD9)  
 079.0 ADENOVIRUS INFECT NOS (ICD9)  
 079.6 RESPIR SYNCITAL VIRUS (Begin 1996) (ICD9)  
 079.82 SARS-ASSOCIATED CORONAVIRUS (Begin 2003) (ICD9)  
 112.4 CANDIDIASIS OF LUNG (ICD9)  
 114.0 PRIMARY COCCIDIOIDOMYCOS (ICD9)  
 114.4 CHRONIC PULMON COCCIDIOIDOMYCOSIS (Begin 1993) (ICD9)  
 114.5 UNSPEC PULMON COCCIDIOIDOMYCOSIS (Begin 1993) (ICD9)  
 115.05 HISTOPLASM CAPS PNEUMON (ICD9)  
 115.10 HISTOPLASMA DUBOISII NOS (ICD9)  
 115.15 HISTOPLASM DUB PNEUMONIA (ICD9)  
 115.90 HISTOPLASMOSIS NOS (ICD9)  
 115.95 HISTOPLASMOSIS PNEUMONIA (ICD9)  
 130.4 TOXOPLASMA PNEUMONITIS (ICD9)  
 136.3 PNEUMOCYSTOSIS (ICD9)  
 464.4 CROUP (ICD9)  
 466.0 ACUTE BRONCHITIS (ICD9)  
 466.1 ACUTE BRONCHIOLITIS (End 1996) (ICD9)  
 466.11 RSV BRONCHIOLITIS (Begin 1996) (ICD9)  
 466.19 OTH ACUTE BRONCHIOL (Begin 1996) (ICD9)  
 480.0 ADENOVIRAL PNEUMONIA (ICD9)  
 480.1 RESP SYNCYT VIRAL PNEUM (ICD9)  
 480.2 PARINFLUENZA VIRAL PNEUM (ICD9)  
 480.3 PNEUMONIA DUE TO SARS-ASSOCIATED CORONAVIRUS (Begin 2003) (ICD9)  
 480.8 VIRAL PNEUMONIA NEC (ICD9)

480.9 VIRAL PNEUMONIA NOS (ICD9)  
481 PNEUMOCOCCAL PNEUMONIA (ICD9)  
481.9 (no description found)  
482.0 K. PNEUMONIAE PNEUMONIA (ICD9)  
482.1 PSEUDOMONAL PNEUMONIA (ICD9)  
482.2 H.INFLUENZAE PNEUMONIA (ICD9)  
482.3 STREPTOCOCCAL PNEUMONIA (Begin 1980 (ICD9)  
482.30 STREP PNEUMONIA UNSPEC (Begin 1992) (ICD9)  
482.31 GRP A STREP PNEUMONIA (Begin 1992) (ICD9)  
482.32 GRP B STREP PNEUMONIA (Begin 1992) (ICD9)  
482.39 OTH STREP PNEUMONIA (Begin 1992) (ICD9)  
482.4 STAPHYLOCOCCAL PNEUMONIA (End 1998) (ICD9)  
482.40 STAPH PNEUMONIA UNSP (Begin 1998) (ICD9)  
482.41 STAPH AUREUS PNEUMON (Begin 1998) (ICD9)  
482.42 (no description found)  
482.49 STAPH PNEUMON OTH (Begin 1998) (ICD9)  
482.8 BACTERIAL PNEUMONIA NEC (Begin 1980 (ICD9)  
482.81 ANAEROBIC PNEUMONIA (Begin 1992) (ICD9)  
482.82 E COLI PNEUMONIA (Begin 1992) (ICD9)  
482.83 OTH GRAM NEG PNEUMONIA (Begin 1992) (ICD9)  
482.84 LEGIONNAIRES DX (Begin 1997) (ICD9)  
482.89 BACT PNEUMONIA NEC (Begin 1992) (ICD9)  
482.9 BACTERIAL PNEUMONIA NOS (ICD9)  
483 PNEUMONIA: ORGANISM NEC (Begin 1980 (ICD9)  
483.0 MYCOPLASMA PNEUMONIA (Begin 1992) (ICD9)  
483.1 CHLAMYDIA PNEUMONIA (Begin 1996) (ICD9)  
483.8 OTH SPEC ORG PNEUMONIA (Begin 1992) (ICD9)  
484.1 PNEUM W CYTOMEG INCL DIS (ICD9)  
484.3 PNEUMONIA IN WHOOP COUGH (ICD9)  
484.5 PNEUMONIA IN ANTHRAX (ICD9)  
484.6 PNEUM IN ASPERGILLOSIS (ICD9)  
484.7 PNEUM IN OTH SYS MYCOSES (ICD9)  
484.8 PNEUM IN INFECT DIS NEC (ICD9)  
485 BRONCOPNEUMONIA ORG NOS (ICD9)  
486 PNEUMONIA- ORGANISM NOS (ICD9)  
487.0 INFLUENZA WITH PNEUMONIA (ICD9)  
487.1 FLU W RESP MANIFEST NEC (ICD9)  
487.8 FLU W MANIFESTATION NEC (ICD9)  
488.01 FLU D/T IDENTIFIED AVIAN FLU VIRUS WITH PNEUMONIA  
488.02 FLU D/T IDENTIFIED AVIAN FLU VIRUS WITH OTHER RESPIRATORY  
MANIFESTATIONS  
488.11 FLU D/T IDENTIFIED 2009 H1N1 FLU VIRUS WITH PNEUMONIA  
488.12 FLU D/T IDENTIFIED 2009 H1N1 FLU VIRUS WITH OTHER RESPIRATORY  
MANIFESTATIONS  
488.81 FLU D/T IDENTIFIED NOVEL INFLUENZA A VIRUS W/ PNEUMONIA  
488.82 FLU D/T IDENTIFIED NOVEL INFLUENZA A VIRUS W/ OTHER RESP MANIF  
490 BRONCHITIS NOS  
491.0 SIMPLE CHR BRONCHITIS (ICD9)  
491.1 MUCOPURUL CHR BRONCHITIS (ICD9)  
491.2 OBSTRUCT CHR BRONCHITIS (Begin 1980 (ICD9)  
491.20 OBS CHR BRNC W/O ACT EXA (Begin 1991) (ICD9)  
491.21 OBS CHR BRNC W ACT EXA (Begin 1991) (ICD9)  
491.22 OBS CHR BRONC W AC BRONC (Begin 2004) (ICD9)  
491.8 CHRONIC BRONCHITIS NEC (ICD9)  
491.9 CHRONIC BRONCHITIS NOS (ICD9)  
494 BRONCHIECTASIS (End 2000) (ICD9)  
494.0 BRONCHIECTASIS W/O ACUTE EXACERBATN (Begin 2000) (ICD9)  
494.1 BRONCHIECTASIS W/ACUTE EXACERBATION (Begin 2000) (ICD9)  
510.0 EMPYEMA WITH FISTULA  
510.9 EMPYEMA W/O FISTULA

513.0 ABSCESS OF LUNG (ICD9)  
513.1 ABSCESS OF MEDIASTINUM  
517.1 RHEUMATIC PNEUMONIA (ICD9)  
770.0 CONGENITAL PNEUMONIA

A06.5+ Amebic lung abscess (ICD10)  
A15.0 Tuberculosis of lung  
A15.1 Tuberculosis of lung, confirmed by culture only  
A15.2 Tuberculosis of lung, confirmed histologically  
A15.3 Tuberculosis of lung, confirmed by unspecified means  
A15.4 Tuberculosis of intrathoracic lymph nodes  
A15.5 Tuberculosis of larynx, trachea and bronchus  
A15.6 Tuberculosis pleurisy  
A15.7 Primary respiratory tuberculosis  
A15.8 Other respiratory tuberculosis  
A15.9 Respiratory tuberculosis unspecified, confirmed bacteriologically and histologically  
A16.0 Tuberculosis of lung, bacteriologically and histologically negative  
A16.1 Tuberculosis of lung, bacteriological and histological examination not done  
A16.2 Tuberculosis of lung, without mention of bacteriological or histological confirmation  
A16.3 Tuberculosis of intrathoracic lymph nodes, without mention of bacteriological or histological confirmation  
A16.4 Tuberculosis of larynx, trachea and bronchus, without mention of bacteriological or histological confirmation  
A16.5 Tuberculous pleurisy, without mention of bacteriological or histological confirmation  
A16.7 Primary respiratory tuberculosis, without mention of bacteriological or histological confirmation  
A16.8 Other respiratory tuberculosis, without mention of bacteriological or histological confirmation  
A16.9 Respiratory tuberculosis unspecified, without mention of bacteriological or histological confirmation  
A19.2 Acute miliary tuberculosis, unspecified (ICD10)  
A19.8 Other miliary tuberculosis (ICD10)  
A19.9 Miliary tuberculosis, unspecified (ICD10)  
A20.2 Pneumonic plague (ICD10)  
A21.2 Pulmonary tularemia (ICD10)  
A22.1 Pulmonary anthrax (ICD10)  
A24.0 Glanders  
A31.0 Pulmonary mycobacterial infection (ICD10)  
A37.0 Whooping cough due to Bordetella pertussis (ICD10)  
A37.1 Whooping cough due to Bordetella parapertussis (ICD10)  
A37.8 Whooping cough due to other Bordetella species (ICD10)  
A37.9 Whooping cough, unspecified (ICD10)  
A42.0 Pulmonary actinomycosis (ICD10)  
A48.1 Legionnaires disease  
A70 Chlamydia psittaci infections (ICD10)  
A70+ (no description found)  
B01.2+ Varicella pneumonia (ICD10)  
B05.2+ Measles complicated by pneumonia (ICD10)  
B34.0 Adenovirus infection, unspecified (ICD10)  
B37.1 Pulmonary candidiasis (ICD10)  
B38.0 Acute pulmonary coccidioidomycosis (ICD10)  
B38.1 Chronic pulmonary coccidioidomycosis (ICD10)  
B38.2 Pulmonary coccidioidomycosis, unspecified (ICD10)  
B39.0 Acute pulmonary histoplasmosis capsulati  
B39.1 Chronic pulmonary histoplasmosis capsulati  
B39.2 Pulmonary histoplasmosis capsulati, unspecified (ICD10)  
B39.3 Disseminated histoplasmosis capsulati  
B39.4 Histoplasmosis capsulati, unspecified  
B39.5 Histoplasmosis duboisii (ICD10)  
B39.9 Histoplasmosis, unspecified (ICD10)  
B40.0 Acute pulmonary blastomycosis  
B40.1 Chronic pulmonary blastomycosis  
B40.2 Pulmonary blastomycosis, unspecified  
B40.3 Cutaneous blastomycosis

B40.7 Disseminated blastomycosis  
 B40.8 Other forms of blastomycosis  
 B41.0 Pulmonary paracoccidioidomycosis  
 B42.0+ Pulmonary sporotrichosis  
 B44.0 Invasive pulmonary aspergillosis  
 B44.1 Other pulmonary aspergillosis  
 B45.0 Pulmonary cryptococcosis  
 B58.3+ Pulmonary toxoplasmosis (ICD10)  
 B59 Pneumocystosis (ICD10)  
 J05.0 Acute obstructive laryngitis [croup] (ICD10)  
 J09 Influenza due to certain identified influenza virus  
 J10.0 Influenza with pneumonia, influenza virus identified (ICD10)  
 J10.1 Influenza due to other influenza virus with respiratory manifestations (ICD10)  
 J11.0 Influenza with pneumonia, virus not identified (ICD10)  
 J11.1 Influenza with other respiratory manifestations, virus not identified (ICD10)  
 J12.0 Adenoviral pneumonia (ICD10)  
 J12.1 Respiratory syncytial virus pneumonia (ICD10)  
 J12.2 Parainfluenza virus pneumonia (ICD10)  
 J12.3 Human metapneumovirus pneumonia  
 J12.8 Other viral pneumonia (ICD10)  
 J12.9 Viral pneumonia, unspecified (ICD10)  
 J13 Pneumonia due to *Streptococcus pneumoniae* (ICD10)  
 J14 Pneumonia due to *Hemophilus influenzae* (ICD10)  
 J15.0 Pneumonia due to *Klebsiella pneumoniae* (ICD10)  
 J15.1 Pneumonia due to *Pseudomonas* (ICD10)  
 J15.2 Pneumonia due to staphylococcus (ICD10)  
 J15.3 Pneumonia due to streptococcus, group B (ICD10)  
 J15.4 Pneumonia due to other streptococci (ICD10)  
 J15.5 Pneumonia due to *Escherichia coli* (ICD10)  
 J15.6 Pneumonia due to other aerobic Gram-negative bacteria (ICD10)  
 J15.7 Pneumonia due to *Mycoplasma pneumoniae* (ICD10)  
 J15.8 Pneumonia due to other specified bacteria (ICD10)  
 J15.9 Unspecified bacterial pneumonia (ICD10)  
 J16.0 Chlamydial pneumonia  
 J16.8 Pneumonia due to other specified infectious organisms (ICD10)  
 J17.0\* Pneumonia in bacterial diseases classified elsewhere (ICD10)  
 J17.1\* Pneumonia in viral diseases classified elsewhere (ICD10)  
 J17.2\* Pneumonia in mycoses (ICD10)  
 J17.3 Pneumonia in parasitic diseases  
 J17.8\* Pneumonia in other diseases classified elsewhere (ICD10)  
 J18.0 Bronchopneumonia, unspecified organism (ICD10)  
 J18.1 Lobar pneumonia, unspecified  
 J18.8 Other pneumonia, unspecified organism (ICD10)  
 J18.9 Pneumonia, unspecified  
 J20.0 Acute bronchitis due to *Mycoplasma pneumoniae* (ICD10)  
 J20.1 Acute bronchitis due to *Hemophilus influenzae* (ICD10)  
 J20.2 Acute bronchitis due to streptococcus (ICD10)  
 J20.3 Acute bronchitis due to coxsackievirus (ICD10)  
 J20.4 Acute bronchitis due to parainfluenza virus (ICD10)  
 J20.5 Acute bronchitis due to respiratory syncytial virus (ICD10)  
 J20.6 Acute bronchitis due to rhinovirus (ICD10)  
 J20.7 Acute bronchitis due to echovirus (ICD10)  
 J20.8 Acute bronchitis due to other specified organisms (ICD10)  
 J20.9 Acute bronchitis, unspecified (ICD10)  
 J21.0 Acute bronchiolitis due to respiratory syncytial virus  
 J21.1 Acute bronchiolitis due to human megapneumovirus  
 J21.8 Acute bronchiolitis due to other specified organisms  
 J21.9 Acute bronchiolitis, unspecified (ICD10)  
 J22 Unspecified acute lower respiratory infection (ICD10)  
 J22.0 (no description found)

J40 Bronchitis, not specified as acute or chronic  
J41.0 Simple chronic bronchitis (ICD10)  
J41.1 Mucopurulent chronic bronchitis (ICD10)  
J41.8 Mixed simple and mucopurulent chronic bronchitis  
J42 Unspecified chronic bronchitis (ICD10)  
J44.0 Chronic obstructive pulmonary disease with acute lower respiratory infection  
J47 Bronchiectasis (ICD10)  
J65 Pneumoconiosis associated with tuberculosis  
J85.0 Gangrene and necrosis of lung  
J85.1 Abscess of lung with pneumonia  
J85.2 Abscess of lung without pneumonia (ICD10)  
J86.0 Pyothorax with fistula  
J86.9 Pyothorax without fistula  
P23.0 Congenital pneumonia due to viral agent  
P23.2 Congenital pneumonia due to staphylococcus  
P23.3 Congenital pneumonia due to staphylococcus, group B  
P23.4 Congenital pneumonia due to Escherichia coli  
P23.5 Congenital pneumonia due to Pseudomonas  
P23.6 Congenital pneumonia due to other bacterial agents  
P23.8 Congenital pneumonia due to other organisms  
P23.9 Congenital pneumonia, unspecified

**Supplementary Table: ICD codes for skin and soft tissue infection diagnostic group**

006.6 AMEBIC SKIN ULCERATION (ICD9)  
020.1 CELLULOCUTANEOUS PLAGUE  
022.0 CUTANEOUS ANTHRAX  
031.1 CUTANEOUS MYCOBACTERIA (ICD9)  
032.85 CUTANEOUS DIPHTHERIA  
035 ERYSIPELAS (ICD9)  
039.0 CUTANEOUS ACTINOMYCOSIS  
039.4 MADURA FOOT  
040.0 GAS GANGRENE  
040.42 WOUND BOTULISM  
040.81 TROPICAL PYOMYOSITIS  
054.0 ECZEMA HERPETICUM (ICD9)  
110.0 DERMATOPHYT SCALP/BEARD  
110.1 DERMATOPHYTOSIS OF NAIL  
110.2 DERMATOPHYTOSIS OF HAND  
110.3 DERMATOPHYTOSIS OF GROIN  
110.4 DERMATOPHYTOSIS OF FOOT  
110.5 DERMATOPHYTOSIS OF BODY  
110.6 DEEP DERMATOPHYTOSIS  
110.8 DERMATOPHYTOSIS SITE NEC  
110.9 DERMATOPHYTOSIS SITE NOS (ICD9)  
111.0 PITYRIASIS VERSICOLOR  
111.1 TINEA NIGRA  
111.2 TINEA BLANCA  
111.3 BLACK PIEDRA  
111.8 DERMATOMYCOSES NEC  
111.9 DERMATOMYCOSES NOS  
112.3 CUTANEOUS CANDIDIASIS (ICD9)  
132.0 PEDICULUS CAPITIS (ICD9)  
132.1 PEDICULUS CORPORIS (ICD9)  
132.2 PHTHIRUS PUBIS (ICD9)  
132.3 MIXED PEDICUL & PHTHIRUS (ICD9)  
132.9 PEDICULOSIS NOS (ICD9)  
133.0 SCABIES (ICD9)  
133.8 ACARIASIS NEC (ICD9)  
133.9 ACARIASIS NOS (ICD9)  
134.0 MYIASIS (ICD9)  
134.1 ARTHROPOD INFEST NEC (ICD9)  
134.2 HIRUDINIASIS (ICD9)  
134.8 INFESTATION NEC (ICD9)  
134.9 INFESTATION NOS (ICD9)  
376.01 ORBITAL CELLULITIS (ICD9)  
380.10 INFEC OTITIS EXTERNA NOS (ICD9)  
380.11 ACUTE INFECTION OF PINNA (ICD9)  
675.00 INFECT NIPPLE PREG-UNSP  
675.01 INFECT NIPPLE-DELIVERED  
675.02 INFECT NIPPLE-DEL W P/P  
675.03 INFECT NIPPLE-ANTEPARTUM  
675.04 INFECT NIPPLE-POSTPARTUM  
675.10 BREAST ABSCESS PREG-UNSP  
675.11 BREAST ABSCESS-DELIVERED  
675.12 BREAST ABSCESS-DEL W P/P  
675.13 BREAST ABSCESS-ANTEPARTUM  
675.14 BREAST ABSCESS-POSTPARTUM  
675.20 MASTITIS IN PREG- UNSP  
675.21 MASTITIS- DELIVERED  
675.22 MASTITIS- DEL W P/P  
675.23 MASTITIS- ANTEPARTUM

675.24 MASTITIS- POSTPARTUM  
675.80 BREAST INF PREG NEC-UNSP  
675.81 BREAST INF NEC- DELIVERED  
675.82 BREAST INF NEC- DEL W P/P  
675.83 BREAST INF NEC- ANTEPARTUM  
675.84 BREAST INF NEC- POSTPARTUM  
675.90 BREAST INF PREG NOS-UNSP  
675.91 BREAST INF NOS- DELIVERED  
675.92 BREAST INF NOS- DEL W P/P  
675.93 BREAST INF NOS- ANTEPARTUM  
675.94 BREAST INF NOS- POSTPARTUM  
680.0 CARBUNCLE OF FACE (ICD9)  
680.1 CARBUNCLE OF NECK (ICD9)  
680.2 CARBUNCLE OF TRUNK (ICD9)  
680.3 CARBUNCLE OF ARM (ICD9)  
680.4 CARBUNCLE OF HAND  
680.5 CARBUNCLE OF BUTTOCK (ICD9)  
680.6 CARBUNCLE OF LEG (ICD9)  
680.7 CARBUNCLE OF FURUNCLE OF FOOT  
680.8 CARBUNCLE- SITE NEC (ICD9)  
680.9 CARBUNCLE NOS (ICD9)  
681.00 CELLULITIS- FINGER NOS (ICD9)  
681.01 FELON  
681.02 ONYCHIA OF FINGER  
681.10 CELLULITIS- TOE NOS (ICD9)  
681.11 ONYCHIA OF TOE  
681.9 CELLULITIS OF DIGIT NOS  
682.0 CELLULITIS OF FACE (ICD9)  
682.1 CELLULITIS OF NECK (ICD9)  
682.2 CELLULITIS OF TRUNK (ICD9)  
682.3 CELLULITIS OF ARM (ICD9)  
682.4 CELLULITIS OF HAND (ICD9)  
682.5 CELLULITIS OF BUTTOCK (ICD9)  
682.6 CELLULITIS OF LEG (ICD9)  
682.7 CELLULITIS OF FOOT (ICD9)  
682.8 CELLULITIS- SITE NEC (ICD9)  
682.9 CELLULITIS NOS (ICD9)  
684 IMPETIGO (ICD9)  
685.0 PILONIDAL CYST W ABSCESS  
685.1 PILONIDAL CYST W/O ABSC (ICD9)  
686.0 PYODERMA (End 1997) (ICD9)  
686.00 PYODERMA NOS  
686.01 PYODERMA GANGREN  
686.09 PYODERMA NEC  
686.1 PYOGENIC GRANULOMA  
686.8 LOCAL SKIN INFECTION NEC  
686.9 LOCAL SKIN INFECTION NOS (ICD9)  
690.8 OTHER ERYTHEMATOSQUAMOUS DERMATOSIS  
694.0 DERMATITIS HERPETIFORMIS  
694.1 SUBCORNEAL PUST DERMATOS  
694.2 JUVEN DERMAT HERPETIFORM  
694.3 IMPETIGO HERPETIFORMIS  
771.5 NEONATAL INFEC MASTITISA06.7 Cutaneous amebiasis (ICD10)  
A31.1 Cutaneous mycobacterial infection (ICD10)  
A46 Erysipelas (ICD10)  
B00.0 Eczema herpeticum (ICD10)  
B35.0 Tinea barbae and tinea capitis  
B35.1 Tinea unguium  
B35.2 Tinea manuum  
B35.3 Tinea pedis

B35.4 Tinea corporis  
 B35.5 Tinea imbricate  
 B35.6 Tinea cruris  
 B35.8 Other dermatophytoses  
 B35.9 Dermatitis, unspecified (ICD10)  
 B36.0 Pityriasis versicolor  
 B36.1 Tinea nigra  
 B36.2 White piedra  
 B36.3 Black piedra  
 B36.8 Other specified superficial mycoses  
 B37.2 Candidiasis of skin and nail (ICD10)  
 B85.0 Pediculosis due to *Pediculus humanus capitis* (ICD10)  
 B85.1 Pediculosis due to *Pediculus humanus corporis* (ICD10)  
 B85.2 Pediculosis, unspecified (ICD10)  
 B85.3 Phthiriasis (ICD10)  
 B85.4 Mixed pediculosis and phthiriasis (ICD10)  
 B86 Scabies (ICD10)  
 B87.9 Myiasis, unspecified (ICD10)  
 B88.0 Other acariasis (ICD10)  
 B88.1 Tungiasis [sandflea infestation] (ICD10)  
 B88.2 Other arthropod infestations (ICD10)  
 B88.3 External hirudiniasis (ICD10)  
 B88.8 Other specified infestations (ICD10)  
 B88.9 Infestation, unspecified (ICD10)  
 H60.3 Other infective otitis externa (ICD10)  
 L00 Staphylococcal scalded skin syndrome  
 L01.0 Impetigo [any organism] [any site] (ICD10)  
 L02.0 Cutaneous abscess, furuncle and carbuncle of face (ICD10)  
 L02.1 Cutaneous abscess, furuncle and carbuncle of neck (ICD10)  
 L02.2 Cutaneous abscess, furuncle and carbuncle of trunk (ICD10)  
 L02.3 Cutaneous abscess, furuncle and carbuncle of buttock (ICD10)  
 L02.4 Cutaneous abscess, furuncle and carbuncle of limb (ICD10)  
 L02.8 Cutaneous abscess, furuncle and carbuncle of other sites (ICD10)  
 L02.9 Cutaneous abscess, furuncle and carbuncle, unspecified (ICD10)  
 L03.01 Cellulitis of finger (ICD10)  
 L03.02 Cellulitis of toe (ICD10)  
 L03.10 Cellulitis of upper limb (ICD10)  
 L03.11 Cellulitis of lower limb (ICD10)  
 L03.2 Cellulitis of face (ICD10)  
 L03.3 Cellulitis of trunk (ICD10)  
 L03.8 Cellulitis of other sites (ICD10)  
 L03.9 Cellulitis, unspecified (ICD10)  
 L05.0 Pilonidal cyst with abscess  
 L05.9 Pilonidal cyst without abscess (ICD10)  
 L08.0 Pyoderma (ICD10)  
 L08.1 Erythrasma  
 L08.8 Other specified local infections of skin and subcutaneous tissue  
 L08.9 Local infection of the skin and subcutaneous tissue, unspecified  
 L13.0 Dermatitis herpetiformis  
 L30.3 Infective dermatitis  
 L88 Pyoderma gangrenosum  
 M60.09 Infective myositis, multiple sites  
 M63.0 Myositis in bacterial diseases classified elsewhere  
 M63.1 Myositis in protozoal and parasitic infections classified elsewhere  
 M63.2 Myositis in other infectious diseases classified elsewhere  
 M65.0 Abscess of tendon sheath  
 M65.1 Other infective (teno)synovitis  
 M68.0 Synovitis and tenosynovitis in bacterial diseases classified elsewhere  
 M71.0 Abscess of bursa  
 M71.1 Other infective bursitis



O91.00 Infection of nipple associated with childbirth, without mention of attachment difficulty  
O91.10 Abscess of breast associated with childbirth, without mention of attachment difficulty  
P39.0 Neonatal infective mastitis  
P39.4 Neonatal skin infection

**Supplementary Table: ICD codes for upper respiratory infection diagnostic group**

032.0 FAUCIAL DIPHTHERIA (ICD9)  
032.1 NASOPHARYNX DIPHTHERIA (ICD9)  
032.2 ANT NASAL DIPHTHERIA (ICD9)  
032.3 LARYNGEAL DIPHTHERIA (ICD9)  
034.0 STREP SORE THROAT (ICD9)  
040.1 RHINOSCLEROMA  
055.2 POSTMEASLES OTITIS MEDIA (ICD9)  
079.3 RHINOVIRUS INFECT NOS (ICD9)  
381.00 AC NONSUP OTITIS MED NOS (ICD9)  
381.01 AC SEROUS OTITIS MEDIA (ICD9)  
381.02 AC MUCOID OTITIS MEDIA (ICD9)  
381.03 ACUTE SANGUINOUS OTITIS MEDIA  
381.10 CHR SEROUS OM SIMP/NOS (ICD9)  
381.19 CHR SEROUS OM NEC (ICD9)  
381.20 CHR MUCOID OM SIMP/NOS (ICD9)  
381.29 CHR MUCOID OM NEC (ICD9)  
381.3 CHR NONSUP OM NOS/NEC (ICD9)  
381.4 NONSUPP OTITIS MEDIA NOS (ICD9)  
382.00 AC SUPP OTITIS MEDIA NOS (ICD9)  
382.01 AC SUPP OM W DRUM RUPT (ICD9)  
382.02 AC SUPP OM IN OTH DIS (ICD9)  
382.1 CHR TUBOTYMPAN SUPPUR OM (ICD9)  
382.2 CHR ATTICOANTRAL SUP OM (ICD9)  
382.3 CHR SUP OTITIS MEDIA NOS (ICD9)  
382.4 SUPPUR OTITIS MEDIA NOS (ICD9)  
382.9 OTITIS MEDIA NOS (ICD9)  
383.00 AC MASTOIDITIS W/O COMPL (ICD9)  
383.01 SUBPERI MASTOID ABSCESS (ICD9)  
383.02 AC MASTOIDITIS-COMPL NEC (ICD9)  
383.1 CHRONIC MASTOIDITIS (ICD9)  
383.20 PETROSITIS NOS (ICD9)  
383.21 ACUTE PETROSITIS (ICD9)  
383.22 CHRONIC PETROSITIS (ICD9)  
383.30 POSTMASTOID COMPL NOS (ICD9)  
383.31 POSTMASTOID MUCOSAL CYST (ICD9)  
383.32 POSTMASTOID CHOLESTEATMA (ICD9)  
383.33 POSTMASTOID GRANULATIONS (ICD9)  
383.89 DISORDERS OF MASTOID NEC (ICD9)  
383.9 MASTOIDITIS NOS (ICD9)  
384.00 ACUTE MYRINGITIS UNSPECIFIED  
384.01 BULLOUS MYRINGITIS  
384.09 OTHER ACUTE MYRINGITIS WITHOUT OTITIS MEDIA  
384.20 PERFORAT TYMPAN MEMB NOS (ICD9)  
384.21 CENT PERF TYMPANIC MEMB (ICD9)  
384.22 ATTIC PERF TYMPANIC MEMB (ICD9)  
384.23 MARGINAL PERF TYMP NEC (ICD9)  
384.24 MULT PERF TYMPANIC MEMB (ICD9)  
384.25 TOTAL PERF TYMPANIC MEMB (ICD9)  
386.3 LABYRINTHITIS  
386.30 LABYRINTHITIS UNSPECIFIED  
386.31 SEROUS LABYRINTHITIS  
386.32 CIRCUMSCRIBED LABYRINTHITIS  
386.33 SUPPURATIVE LABYRINTHITIS  
386.34 TOXIC LABYRINTHITIS  
386.35 VIRAL LABYRINTHITIS  
388.6 OTORRHEA  
460 ACUTE NASOPHARYNGITIS (ICD9)  
461.0 AC MAXILLARY SINUSITIS (ICD9)

461.1 AC FRONTAL SINUSITIS (ICD9)  
 461.2 AC ETHMOIDAL SINUSITIS (ICD9)  
 461.3 AC SPHENOIDAL SINUSITIS (ICD9)  
 461.8 OTHER ACUTE SINUSITIS (ICD9)  
 461.9 ACUTE SINUSITIS NOS (ICD9)  
 462 ACUTE PHARYNGITIS (ICD9)  
 463 ACUTE TONSILLITIS (ICD9)  
 464.0 ACUTE LARYNGITIS (End 2001) (ICD9)  
 464.00 ACUTE LARYNGITIS- W/O OBSTR (Begin 2001) (ICD9)  
 464.01 ACUTE LARYNGITIS- W OBSTR (Begin 2001) (ICD9)  
 464.10 AC TRACHEITIS NO OBSTRUC (ICD9)  
 464.11 AC TRACHEITIS W OBSTRUCT (ICD9)  
 464.20 AC LARYNGOTRACH NO OBSTR (ICD9)  
 464.21 AC LARYNGOTRACH W OBSTR (ICD9)  
 464.30 AC EPIGLOTTITIS NO OBSTR (ICD9)  
 464.31 AC EPIGLOTTITIS W OBSTR (ICD9)  
 464.50 SUPRAGLOTTIS NOS- W/O OBSTR (Begin 2001) (ICD9)  
 464.51 SUPRAGLOTTIS NOS- W/ OBSTR (Begin 2001) (ICD9)  
 465.0 ACUTE LARYNGOPHARYNGITIS (ICD9)  
 465.8 ACUTE URI MULT SITES NEC (ICD9)  
 465.9 ACUTE URI NOS (ICD9)  
 473.0 CHR MAXILLARY SINUSITIS (ICD9)  
 473.1 CHR FRONTAL SINUSITIS (ICD9)  
 473.2 CHR ETHMOIDAL SINUSITIS (ICD9)  
 473.3 CHR SPHENOIDAL SINUSITIS (ICD9)  
 473.8 CHRONIC SINUSITIS NEC (ICD9)  
 473.9 CHRONIC SINUSITIS NOS- (ICD9)  
 474.0 CHRONIC TONSILLITIS (End 1997) (ICD9)  
 474.00 CHRON TONSILLITIS (Begin 1997) (ICD9)  
 474.01 CHRON ADENOIDITIS (Begin 1997) (ICD9)  
 474.02 CHRON TONSIL ADENOID (Begin 1997) (ICD9)  
 475 PERITONSILLAR ABSCESS (ICD9)  
 476.0 CHRONIC LARYNGITIS  
 476.1 CHRONIC LARYNGOTRACHEITIS  
 478.21 CELLULITIS OF PHARYNX  
 478.22 PARAPHARYNGEAL ABSCESS  
 478.24 RETROPHARYNGEAL ABSCESS  
 478.29 DISEASE OF PHARYNX NEC  
 478.71 LARYNGEAL CELLULITIS

A36.0 Pharyngeal diphtheria (ICD10)  
 A36.1 Nasopharyngeal diphtheria (ICD10)  
 A36.2 Laryngeal diphtheria (ICD10)  
 B05.3+ Measles complicated by otitis media (ICD10)  
 H65.0 Acute serous otitis media (ICD10)  
 H65.1 Other acute nonsuppurative otitis media (ICD10)  
 H65.2 Chronic serous otitis media (ICD10)  
 H65.3 Chronic mucoid otitis media (ICD10)  
 H65.4 Other chronic nonsuppurative otitis media (ICD10)  
 H65.9 Nonsuppurative otitis media, unspecified (ICD10)  
 H66.0 Acute suppurative otitis media (ICD10)  
 H66.1 Chronic tubotympanic suppurative otitis media (ICD10)  
 H66.2 Chronic atticofurrow suppurative otitis media (ICD10)  
 H66.3 Other chronic suppurative otitis media (ICD10)  
 H66.4 Suppurative otitis media, unspecified (ICD10)  
 H66.9 Otitis media, unspecified (ICD10)  
 H67.0 Otitis media in bacterial diseases classified elsewhere  
 H67.8\* Otitis media in other diseases classified elsewhere (ICD10)  
 H68.0 Eustachian salpingitis  
 H70.0 Acute mastoiditis (ICD10)

H70.1 Chronic mastoiditis (ICD10)  
 H70.2 Petrositis (ICD10)  
 H70.8 Other mastoiditis and related conditions (ICD10)  
 H70.9 Mastoiditis, unspecified (ICD10)  
 H72.0 Central perforation of tympanic membrane (ICD10)  
 H72.1 Attic perforation of tympanic membrane (ICD10)  
 H72.2 Other marginal perforations of tympanic membrane (ICD10)  
 H72.8 Other perforations of tympanic membrane (ICD10)  
 H72.9 Perforation of tympanic membrane, unspecified (ICD10)  
 H73.0 Acute myringitis  
 H75.0 Mastoiditis in infectious and parasitic diseases classified elsewhere  
 H83.0 Labyrinthitis  
 H92.1 Otorrhoea  
 J00 Acute nasopharyngitis [common cold] (ICD10)  
 J01.0 Acute maxillary sinusitis (ICD10)  
 J01.1 Acute frontal sinusitis (ICD10)  
 J01.2 Acute ethmoidal sinusitis (ICD10)  
 J01.3 Acute sphenoidal sinusitis (ICD10)  
 J01.4 Acute pansinusitis  
 J01.8 Other acute sinusitis (ICD10)  
 J01.9 Acute sinusitis, unspecified (ICD10)  
 J02.0 Streptococcal pharyngitis (ICD10)  
 J02.8 Acute pharyngitis due to other specified organisms  
 J02.9 Acute pharyngitis, unspecified (ICD10)  
 J03.0 Streptococcal tonsillitis  
 J03.8 Acute tonsillitis due to other specified organisms  
 J03.9 Acute tonsillitis, unspecified (ICD10)  
 J04.0 Acute laryngitis (ICD10)  
 J04.1 Acute tracheitis (ICD10)  
 J04.2 Acute laryngotracheitis (ICD10)  
 J05.1 Acute epiglottitis (ICD10)  
 J06.0 Acute laryngopharyngitis (ICD10)  
 J06.8 Other acute upper respiratory infections of multiple sites (ICD10)  
 J06.9 Acute upper respiratory infection, unspecified (ICD10)  
 J32.0 Chronic maxillary sinusitis (ICD10)  
 J32.1 Chronic frontal sinusitis (ICD10)  
 J32.2 Chronic ethmoidal sinusitis (ICD10)  
 J32.3 Chronic sphenoidal sinusitis (ICD10)  
 J32.4 Chronic pansinusitis  
 J32.8 Other chronic sinusitis (ICD10)  
 J32.9 Chronic sinusitis, unspecified (ICD10)  
 J34.0 Abscess, furuncle and carbuncle of nose  
 J35.0 Chronic tonsillitis (ICD10)  
 J36 Peritonsillar abscess (ICD10)

**Supplementary Table: ICD codes for genito-urinary infection diagnostic group**

032.84 DIPHTHERITIC CYSTITIS (ICD9)  
091.0 PRIMARY GENITAL SYPHILIS  
091.1 PRIMARY ANAL SYPHILIS  
091.2 PRIMARY SYPHILIS NEC  
098.0 ACUTE GC INFECT LOWER GU (ICD9)  
098.10 GC (ACUTE) UPPER GU NOS  
098.11 GC CYSTITIS (ACUTE)  
098.12 GC PROSTATITIS (ACUTE)  
098.13 GC ORCHITIS (ACUTE)  
098.14 GC SEM VESICULIT (ACUTE)  
098.15 GC CERVICITIS (ACUTE)  
098.16 GC ENDOMETRITIS (ACUTE)  
098.17 ACUTE GC SALPINGITIS  
098.19 GC (ACUTE) UPPER GU NEC  
098.2 CHR GC INFECT LOWER GU  
098.30 CHR GC UPPER GU NOS  
098.31 GC CYSTITIS-CHRONIC  
098.32 GC PROSTATITIS-CHRONIC  
098.33 GC ORCHITIS-CHRONIC  
098.34 GC SEM VESICULITIS-CHR  
098.35 GC CERVICITIS-CHRONIC  
098.36 GC ENDOMETRITIS-CHRONIC  
098.37 GC SALPINGITIS (CHRONIC)  
098.39 CHR GC UPPER GU NEC  
099.0 CHANCROID  
099.1 LYMPHOGRANULOMA VENEREUM  
099.2 GRANULOMA INGUINALE  
099.41 CHLAMYDIA-URETHRITIS  
099.49 NONGONOCOCC URETHRIT NEC  
099.50 CHLAMYDIA-UNSPEC SITE  
099.51 CHLAMYDIA-PHARYNX  
099.52 CHLAMYDIA-ANUS RECTUM  
099.53 CHLAMYDIA-LOWER GU  
099.54 CHLAMYDIA-OTHER GU  
099.55 CHLAMYDIA-UNSPEC GU  
099.56 CHLAMYDIA-PERITONEUM  
099.59 CHLAMYDIA-NSC  
112.1 CANDIDAL VULVOVAGINITIS  
112.2 CANDIDIAS UROGENITAL NEC  
590.2 RENAL/PERIRENAL ABSCESS (ICD9)  
590.81 PYELITIS OR PYELONEPHRITIS IN DISEASES CLASSIFIED ELSEWHERE  
590.9 INFECTION OF KIDNEY UNSPECIFIED  
595.0 ACUTE CYSTITIS (ICD9)  
595.89 OTHER CYSTITIS, INCL ABSCESS OF BLADDER (ICD9)  
597.0 URETHRAL ABSCESS (ICD9)  
598.00 URETHR STRICT:INFECT NOS (ICD9)  
599.0 URIN TRACT INFECTION NOS (ICD9)  
601.0 ACUTE PROSTATITIS (ICD9)  
601.2 ABSCESS OF PROSTATE (ICD9)  
603.1 INFECTED HYDROCELE (ICD9)  
604.0 ORCHITIS WITH ABSCESS (ICD9)  
614.0 AC SALPINGO-OOPHORITIS (ICD9)  
614.1 CHR SALPINGO-OOPHORITIS (ICD9)  
614.2 SALPINGO-OOPHORITIS NOS (ICD9)  
614.3 ACUTE PARAMETRITIS (ICD9)  
614.4 CHRONIC PARAMETRITIS (ICD9)  
614.5 AC PELV PERITONITIS-FEM (ICD9)  
614.6 FEM PELVIC PERITON ADHES (ICD9)

614.7 CHR PELV PERITON NEC-FEM (ICD9)  
 614.8 FEM PELV INFLAM DIS NEC (ICD9)  
 614.9 FEM PELV INFLAM DIS NOS (ICD9)  
 615.0 AC UTERINE INFLAMMATION (ICD9)  
 615.1 CHR UTERINE INFLAMMATION (ICD9)  
 615.9 UTERINE INFLAM DIS NOS (ICD9)  
 616.0 CERVICITIS (ICD9)  
 616.10 VAGINITIS NOS (ICD9)  
 616.11 VAGINITIS IN OTH DISEASE (ICD9)  
 616.2 BARTHOLIN-s GLAND CYST (ICD9)  
 616.3 BARTHOLIN-s GLND ABSCESS (ICD9)  
 616.4 ABSCESS OF VULVA NEC (ICD9)  
 634.00 SPON ABOR W PEL INF-UNSP (ICD9)  
 634.01 SPON ABOR W PELV INF-INC (ICD9)  
 634.02 SPON ABOR W PELV INF-COMP (ICD9)  
 646.60 GU INFECTION IN PREG-UNSPEC (ICD9)  
 646.61 GU INFECTION-DELIVERED (ICD9)  
 646.62 GU INFECTION-DELIV W P/P (ICD9)  
 646.63 GU INFECTION-ANTEPARTUM (ICD9)  
 646.64 POSTPARTUM INFECTIONS OF GENITOURINARY TRACT  
 647.00 SYPHILIS OF MOTHER COMPLICATING PREGNANCY CHILDBIRTH OR THE  
 PUERPERIUS UNSPECIFIED AS TO EPISODE OF CARE  
 647.01 SYPHILIS OF MOTHER COMPLICATING PREGNANCY WITH DELIVERY  
 647.02 SYPHILIS OF MOTHER COMPLICATING PREGNANCY WITH DELIVERY WITH  
 POSTPARTUM COMPLICATION  
 647.03 ANTEPARTUM SYPHILIS  
 647.04 POSTPARTUM SYPHILIS  
 647.10 GONORRHEA OF MOTHER COMPLICATING PREGNANCY CHILDBIRTH OR THE  
 PUERPERIUM UNSPECIFIED AS TO EPISODE OF CARE  
 647.11 GONORRHEA OF MOTHER WITH DELIVERY  
 647.12 GONORRHEA OF MOTHER WITH DELIVERY WITH POSTPARTUM COMPLICATION  
 647.13 ANTEPARTUM GONORRHEA  
 647.14 POSTPARTUM GONORRHEA  
 647.20 OTHER VENEREAL DISEASES OF MOTHER COMPLICATING PREGNANCY  
 CHILDBIRTH OR PUERPERIUM UNSPECIFIED AS TO EPISODE OF CARE  
 647.21 OTHER VENEREAL DISEASES OF MOTHER WITH DELIVERY  
 647.22 OTHER VENEREAL DISEASES OF MOTHER WITH DELIVERY WITH POSTPARTUM  
 COMPLICATION  
 647.23 OTHER ANTEPARTUM VENEREAL DISEASES  
 647.24 OTHER POSTPARTUM VENEREAL DISEASES  
 771.82 URINARY TRACT INFECTION OF NEWBORN (Begin 2002) (ICD9)  
 A36.8+ (no description found)  
 A51.0 Primary genital syphilis (ICD10)  
 A51.1 Primary anal syphilis (ICD10)  
 A51.2 Primary syphilis of other sites (ICD10)  
 A51.3 Secondary syphilis of skin and mucous membranes (ICD10)  
 A51.3+ (no description found)  
 A51.4 Other secondary syphilis (ICD10)  
 A51.5 Early syphilis, latent (ICD10)  
 A51.9 Early syphilis, unspecified  
 A52.9 Late syphilis, unspecified (ICD10)  
 A53.0 Latent syphilis, unspecified as early or late (ICD10)  
 A53.9 Syphilis, unspecified (ICD10)  
 A54.0 Gonococcal infection of lower genitourinary tract without periurethral or accessory gland abscess  
 (ICD10)  
 A54.1 Gonococcal infection of lower genitourinary tract with periurethral and accessory gland abscess (ICD10)  
 A54.2+ Gonococcal pelviperitonitis and other gonococcal genitourinary infections (ICD10)  
 A54.3 Gonococcal infection of eye (ICD10)  
 A54.3+ (no description found)  
 A54.4+ Gonococcal infection of musculoskeletal system (ICD10)

A54.5 Gonococcal pharyngitis (ICD10)  
 A54.6 Gonococcal infection of anus and rectum (ICD10)  
 A54.8 Other gonococcal infections (ICD10)  
 A54.8+ (no description found)  
 A54.9 Gonococcal infection, unspecified  
 A55 Chlamydial lymphogranuloma (venereum) (ICD10)  
 A56.0 Chlamydial infection of lower genitourinary tract (ICD10)  
 A56.1 Chlamydial infection of pelviperitoneum and other genitourinary organs (ICD10)  
 A56.2 Chlamydial infection of genitourinary tract, unspecified (ICD10)  
 A56.3 Chlamydial infection of anus and rectum (ICD10)  
 A56.4 Chlamydial infection of pharynx (ICD10)  
 A56.8 Sexually transmitted chlamydial infection of other sites (ICD10)  
 A57 Chancroid (ICD10)  
 A58 Granuloma inguinale (ICD10)  
 A59.0 Urogenital trichomoniasis (ICD10)  
 A59.0+ (no description found)  
 A60.0 Herpesviral infection of genitalia and urogenital tract (ICD10)  
 A60.1 Herpesviral infection of perianal skin and rectum  
 A60.9 Anogenital herpesviral infection, unpspecified  
 A63.0 Anogenital (venereal) warts (ICD10)  
 A63.8 Other specified predominantly sexually transmitted diseases (ICD10)  
 A64 Unspecified sexually transmitted disease (ICD10)  
 B37.3+ Candidiasis of vulva and vagina (ICD10)  
 B37.4+ Candidiasis of other urogenital sites (ICD10)  
 N13.6 Pyonephrosis  
 N15.1 Renal and perinephric abscess (ICD10)  
 N30.0 Acute cystitis (ICD10)  
 N30.8 Other cystitis, abscess of bladder (ICD10)  
 N34.0 Urethral abscess (ICD10)  
 N35.1 Postinfective urethral stricture, not elsewhere classified (ICD10)  
 N39.0 Urinary tract infection, site not specified (ICD10)  
 N41.0 Acute prostatitis (ICD10)  
 N41.2 Abscess of prostate (ICD10)  
 N43.1 Infected hydrocele (ICD10)  
 N45.0 Orchitis, epididymitis and epididymo-orchitis with abscess (ICD10)  
 N45.9 Orchitis, epididymitis and epididymo-orchitis without abscess  
 N51.2 Balanitis in diseases classified elsewhere  
 N70.0 Acute salpingitis and oophoritis (ICD10)  
 N73.0 Acute parametritis and pelvic cellulitis (ICD10)  
 N73.1 Chronic parametritis and pelvic cellulitis (ICD10)  
 N73.2 Unspecified parametritis and pelvic cellulitis  
 N73.3 Female acute pelvic peritonitis (ICD10)  
 N73.4 Female chronic pelvic peritonitis (ICD10)  
 N73.9 Female pelvic inflammatory disease, unspecified (ICD10)  
 N74.2 Female syphilitic pelvic inflammatory disease  
 N74.3 Female gonococcal pelvic inflammatory disease  
 N74.4 Female chlamydial pelvic inflammatory disease  
 N75.0 Cyst of Bartholins gland (ICD10)  
 N75.1 Abscess of Bartholins gland (ICD10)  
 N76.0 Acute vaginitis (ICD10)  
 N76.4 Abscess of vulva (ICD10)  
 O03.0 Spontaneous abortion, incomplete, complicated by genital tract and pelvic infection (ICD10)  
 O03.5 Spontaneous abortion, complete or unspecified, complicated by genital tract and pelvic infection (ICD10)  
 O08.0 Genital tract and pelvic infection following ectopic and molar pregnancy (ICD10)  
 O26.4 Herpes gestationis  
 O86.2 Urinary tract infection following delivery  
 O98.1 Syphilis complicating pregnancy, childbirth and the puerperium  
 O98.2 Gonorrhoea complicating pregnancy, childbirth and the puerperium  
 P39.3 Neonatal urinary tract infection

### Supplementary Table: ICD codes for viral infection diagnostic group

|        |                                             |
|--------|---------------------------------------------|
| 042    | HIV DISEASE (Begin 1994) (ICD9)             |
| 042.0  | HIV W/SPECIF INFECTIONS (Begin 1986 (ICD9)  |
| 042.1  | HIV CAUS OTH SPEC INFECT (Begin 1986 (ICD9) |
| 042.2  | HIV W/SPEC MALIG NEOPLSM (Begin 1986 (ICD9) |
| 042.9  | AIDS- UNSPECIFIED (Begin 1986 (ICD9)        |
| 043.0  | HIV CAUS LYMPHADENOPATHY (Begin 1986 (ICD9) |
| 043.1  | HIV CAUS SP CNS DISEASE (Begin 1986 (ICD9)  |
| 043.2  | HIV CAUS OT DISOR IMMUNE (Begin 1986 (ICD9) |
| 043.3  | HIV CAUS OTH SPECIF COND (Begin 1986 (ICD9) |
| 043.9  | ARC- UNSPECIFIED (Begin 1986 (ICD9)         |
| 044.0  | HIV CAUS ACUTE INFECTION (Begin 1986 (ICD9) |
| 044.9  | HIV- UNSPECIFIED (Begin 1986 (ICD9)         |
| 045.00 | AC BULBAR POLIO-TYPE NOS (ICD9)             |
| 045.01 | AC BULBAR POLIO-TYPE 1 (ICD9)               |
| 045.02 | AC BULBAR POLIO-TYPE 2 (ICD9)               |
| 045.03 | AC BULBAR POLIO-TYPE 3 (ICD9)               |
| 045.10 | PARAL POLIO NEC-TYPE NOS (ICD9)             |
| 045.11 | PARAL POLIO NEC-TYPE 1 (ICD9)               |
| 045.12 | PARAL POLIO NEC-TYPE 2 (ICD9)               |
| 045.13 | PARAL POLIO NEC-TYPE 3 (ICD9)               |
| 045.20 | NONPARALY POLIO-TYPE NOS (ICD9)             |
| 045.21 | NONPARALYT POLIO-TYPE 1 (ICD9)              |
| 045.22 | NONPARALYT POLIO-TYPE 2 (ICD9)              |
| 045.23 | NONPARALYT POLIO-TYPE 3 (ICD9)              |
| 045.90 | AC POLIO NOS-TYPE NOS (ICD9)                |
| 045.91 | AC POLIO NOS-TYPE 1 (ICD9)                  |
| 045.92 | AC POLIO NOS-TYPE 2 (ICD9)                  |
| 045.93 | AC POLIO NOS-TYPE 3 (ICD9)                  |
| 046.8  | CNS SLOW VIRUS INFEC NEC (ICD9)             |
| 046.9  | CNS SLOW VIRUS INFEC NOS (ICD9)             |
| 047.0  | COXSACKIE VIRUS MENING (ICD9)               |
| 047.1  | ECHO VIRUS MENINGITIS (ICD9)                |
| 047.8  | VIRAL MENINGITIS NEC (ICD9)                 |
| 047.9  | VIRAL MENINGITIS NOS (ICD9)                 |
| 048    | OTH ENTEROVIRAL CNS DIS (ICD9)              |
| 049.0  | LYMPHOCYTIC CHORIOMENING (ICD9)             |
| 049.1  | ADENOVIRAL MENINGITIS (ICD9)                |
| 049.8  | VIRAL ENCEPHALITIS NEC (ICD9)               |
| 049.9  | VIRAL ENCEPHALITIS NOS (ICD9)               |
| 050.0  | VARIOLA MAJOR (ICD9)                        |
| 050.1  | ALASTRIM (ICD9)                             |
| 050.2  | MODIFIED SMALLPOX (ICD9)                    |
| 050.9  | SMALLPOX NOS (ICD9)                         |
| 051.0  | COWPOX (ICD9)                               |
| 051.01 | (no description found)                      |
| 051.02 | (no description found)                      |
| 051.1  | PSEUDOCOWPOX (ICD9)                         |
| 051.2  | CONTAGIOUS PUSTULAR DERM (ICD9)             |
| 051.9  | PARAVACCINIA NOS (ICD9)                     |
| 052.0  | POSTVARICELLA ENCEPHALIT (ICD9)             |
| 052.2  | POSTVARICELLA MYELITIS (Begin 2006) (ICD9)  |
| 052.7  | VARICELLA COMPLICAT NEC (ICD9)              |
| 052.8  | VARICELLA COMPLICAT NOS (ICD9)              |
| 052.9  | VARICELLA UNCOMPLICATED (ICD9)              |
| 053.0  | HERPES ZOSTER MENINGITIS (ICD9)             |
| 053.10 | H ZOSTER NERV SYST NOS (ICD9)               |
| 053.11 | GENICULATE HERPES ZOSTER (ICD9)             |



053.12 POSTHERPES TRIGEM NEURAL (ICD9)  
 053.13 POSTHERPES POLYNEUROPATH (ICD9)  
 053.14 HERPES ZOSTER MYELITIS (Begin 2006) (ICD9)  
 053.19 H ZOSTER NERV SYST NEC (ICD9)  
 053.20 HERPES ZOSTER OF EYELID (ICD9)  
 053.21 H ZOSTER KERATOCONJUNCT (ICD9)  
 053.22 H ZOSTER IRIDOCYCLITIS (ICD9)  
 053.29 HERPES ZOSTER OF EYE NEC (ICD9)  
 053.71 H ZOSTER OTITIS EXTERNA (ICD9)  
 053.79 H ZOSTER COMPLICATED NEC (ICD9)  
 053.8 H ZOSTER COMPLICATED NOS (ICD9)  
 053.9 HERPES ZOSTER NOS (ICD9)  
 054.10 GENITAL HERPES NOS (ICD9)  
 054.11 HERPETIC VULVOVAGINITIS (ICD9)  
 054.12 HERPETIC ULCER OF VULVA (ICD9)  
 054.13 HERPETIC INFECT OF PENIS (ICD9)  
 054.19 GENITAL HERPES NEC (ICD9)  
 054.2 HERPETIC GINGIVOSTOMAT (ICD9)  
 054.3 HERPETIC ENCEPHALITIS (ICD9)  
 054.40 HERPES SIMPLEX EYE NOS (ICD9)  
 054.41 HERPES SIMPLEX OF EYELID (ICD9)  
 054.42 DENDRITIC KERATITIS (ICD9)  
 054.43 H SIMPLEX KERATITIS (ICD9)  
 054.44 H SIMPLEX IRIDOCYCLITIS (ICD9)  
 054.49 HERPES SIMPLEX EYE NEC (ICD9)  
 054.5 HERPETIC SEPTICEMIA (ICD9)  
 054.6 HERPETIC WHITLOW (ICD9)  
 054.71 VISCERAL HERPES SIMPLEX (ICD9)  
 054.72 H SIMPLEX MENINGITIS (ICD9)  
 054.73 H SIMPLEX OTITIS EXTERNA (ICD9)  
 054.74 HERPES SIMPLEX MYELITIS (Begin 2006) (ICD9)  
 054.79 H SIMPLEX COMPLICAT NEC (ICD9)  
 054.8 H SIMPLEX COMPLICAT NOS (ICD9)  
 054.9 HERPES SIMPLEX NOS (ICD9)  
 055.0 POSTMEASLES ENCEPHALITIS (ICD9)  
 055.71 MEASLES KERATITIS (ICD9)  
 055.79 MEASLES COMPLICATION NEC (ICD9)  
 055.8 MEASLES COMPLICATION NOS (ICD9)  
 055.9 MEASLES UNCOMPLICATED (ICD9)  
 056.00 RUBELLA NERVE COMPL NOS (ICD9)  
 056.01 RUBELLA ENCEPHALITIS (ICD9)  
 056.09 RUBELLA NERVE COMPL NEC (ICD9)  
 056.71 ARTHRITIS DUE TO RUBELLA (ICD9)  
 056.79 RUBELLA COMPLICATION NEC (ICD9)  
 056.8 RUBELLA COMPLICATION NOS (ICD9)  
 056.9 RUBELLA UNCOMPLICATED (ICD9)  
 057.0 ERYTHEMA INFECTIOSUM (ICD9)  
 057.8 VIRAL EXANTHEMATA NEC (ICD9)  
 057.9 VIRAL EXANTHEMATA NOS (ICD9)  
 058.10 ROSEOLA INFANTUM NOS (Begin 2007) (ICD9)  
 058.11 ROSEOLA INFANT D/T HHV-6 (Begin 2007) (ICD9)  
 058.12 ROSEOLA INFANT D/T HHV-7 (Begin 2007) (ICD9)  
 058.21 HUMAN HERPESVIR 6 ENCEPH (Begin 2007) (ICD9)  
 058.29 HUMAN HERPESVR ENCPH NEC (Begin 2007) (ICD9)  
 058.81 HUMAN HERPESVIRUS 6 INFC (Begin 2007) (ICD9)  
 058.82 HUMAN HERPESVIRUS 7 INFC (Begin 2007) (ICD9)  
 058.89 HUMAN HERPESVIRS INF NEC (Begin 2007) (ICD9)  
 059.00 ORTHOPOXVIRUS INFECTION, UNSPECIFIED  
 059.01 MONKEYPOX  
 059.09 OTHER ORTHOPOXVIRUS INFECTIONS

059.10 PARAPOXVIRUS INFECTION, UNSPECIFIED  
 059.11 BOVINE STOMATITIS  
 059.12 SEALPOX  
 059.19 OTHER PARAPOXVIRUS INFECTIONS  
 059.20 YATAPOXVIRUS INFECTION, UNSPECIFIED  
 059.21 TANAPOX  
 059.22 YABA MONKEY TUMOR VIRUS  
 059.8 OTHER POXVIRUS INFECTIONS  
 059.9 POXVIRUS INFECTIONS, UNSPECIFIED  
 060.0 SYLVATIC YELLOW FEVER (ICD9)  
 060.1 URBAN YELLOW FEVER (ICD9)  
 060.9 YELLOW FEVER NOS (ICD9)  
 061 DENGUE (ICD9)  
 062.0 JAPANESE ENCEPHALITIS (ICD9)  
 062.1 WEST EQUINE ENCEPHALITIS (ICD9)  
 062.2 EAST EQUINE ENCEPHALITIS (ICD9)  
 062.3 ST LOUIS ENCEPHALITIS (ICD9)  
 062.4 AUSTRALIAN ENCEPHALITIS (ICD9)  
 062.5 CALIFORNIA ENCEPHALITIS (ICD9)  
 062.8 MOSQUIT-BORNE ENCEPH NEC (ICD9)  
 062.9 MOSQUIT-BORNE ENCEPH NOS (ICD9)  
 063.0 RUSSIA SPR-SUMMER ENCEPH (ICD9)  
 063.1 LOUPING ILL (ICD9)  
 063.2 CENT EUROPE ENCEPHALITIS (ICD9)  
 063.8 TICK-BORNE ENCEPH NEC (ICD9)  
 063.9 TICK-BORNE ENCEPH NOS (ICD9)  
 064 VIR ENCEPH ARTHROPOD NEC (ICD9)  
 065.0 CRIMEAN HEMORRHAGIC FEV (ICD9)  
 065.1 OMSK HEMORRHAGIC FEVER (ICD9)  
 065.2 KYASANUR FOREST DISEASE (ICD9)  
 065.3 TICK-BORNE HEM FEVER NEC (ICD9)  
 065.4 MOSQUITO-BORNE HEM FEVER (ICD9)  
 065.8 ARTHROPOD HEM FEVER NEC (ICD9)  
 065.9 ARTHROPOD HEM FEVER NOS (ICD9)  
 066.0 PHLEBOTOMUS FEVER (ICD9)  
 066.1 TICK-BORNE FEVER (ICD9)  
 066.2 VENEZUELAN EQUINE FEVER  
 066.3 MOSQUITO-BORNE FEVER NEC (ICD9)  
 066.4 WEST NILE FEVER (Begin 2002 (ICD9)  
 066.40 WEST NILE FEVER NOS (Begin 2004) (ICD9)  
 066.41 WEST NILE FEVER W/ENCEPH (Begin 2004) (ICD9)  
 066.42 WEST NILE NEURO MAN NEC (Begin 2004) (ICD9)  
 066.49 WEST NILE W COMPLIC NEC (Begin 2004) (ICD9)  
 066.8 ARTHROPOD VIRUS NEC (ICD9)  
 066.9 ARTHROPOD VIRUS NOS (ICD9)  
 070.0 HEPATITIS A WITH COMA (ICD9)  
 070.1 HEPATITIS A W/O COMA (ICD9)  
 070.2 HEPATITIS B WITH COMA (Begin 1980 (ICD9)  
 070.20 VRL HEPAT B CM W/O DELTA (Begin 1991) (ICD9)  
 070.21 VRL HEPAT B CM W DELTA (Begin 1991) (ICD9)  
 070.22 CHR HEPAT COMA W/O DELTA (Begin 1994) (ICD9)  
 070.23 CHR HEPAT COMA W/ DELTA (Begin 1994) (ICD9)  
 070.3 HEPATITIS B W/O COMA (Begin 1980 (ICD9)  
 070.30 VRL HPT B W/O CM W/O DLT (Begin 1991) (ICD9)  
 070.31 VRL HPT B W/O CM W DELTA (Begin 1991) (ICD9)  
 070.32 CHR HEPAT W/O COMA W/O DELTA (Begin 1994) (ICD9)  
 070.33 CHR HEPAT W/O COMA W/ DELTA (Begin 1994) (ICD9)  
 070.4 VIRAL HEPAT NEC W COMA (Begin 1980 (ICD9)  
 070.41 SPF VRL HPT CM HPT C (Begin 1991) (ICD9)  
 070.42 SPF VRL HPT CM DLT W/O B (Begin 1991) (ICD9)

070.43 SPF VRL HPT CM HPT E (Begin 1991) (ICD9)  
 070.44 CHR HEPAT C W/ COMA (Begin 1994) (ICD9)  
 070.49 SPF VRL HPT CM (Begin 1991) (ICD9)  
 070.5 VIRAL HEPAT NEC W/O COMA (Begin 1980) (ICD9)  
 070.51 VRL HPT W/O CM HEPAT C (Begin 1991) (ICD9)  
 070.52 VRL HPT W/O CM DLT W/O B (Begin 1991) (ICD9)  
 070.53 VRL HPT W/O CM HEPAT E (Begin 1991) (ICD9)  
 070.54 CHR HEPAT C W/O COMA (Begin 1994) (ICD9)  
 070.59 VRL HPT W/O CM (Begin 1991) (ICD9)  
 070.6 VIRAL HEPAT NOS W COMA (ICD9)  
 070.70 HPT C W/O HEPAT COMA NOS (Begin 2004) (ICD9)  
 070.71 HPT C W HEPATIC COMA NOS (Begin 2004) (ICD9)  
 070.9 VIRAL HEPAT NOS W/O COMA (ICD9)  
 071 RABIES (ICD9)  
 072.0 MUMPS ORCHITIS (ICD9)  
 072.1 MUMPS MENINGITIS (ICD9)  
 072.2 MUMPS ENCEPHALITIS (ICD9)  
 072.3 MUMPS PANCREATITIS (ICD9)  
 072.71 MUMPS HEPATITIS (ICD9)  
 072.72 MUMPS POLYNEUROPATHY (ICD9)  
 072.79 MUMPS COMPLICATION NEC (ICD9)  
 072.8 MUMPS COMPLICATION NOS (ICD9)  
 072.9 MUMPS UNCOMPLICATED (ICD9)  
 074.0 HERPANGINA (ICD9)  
 074.1 EPIDEMIC PLEURODYNIA (ICD9)  
 074.20 COXSACKIE CARDITIS UNSPECIFIED  
 074.21 COXSACKIE PERICARDITIS  
 074.22 COXSACKIE ENDOCARDITIS  
 074.23 COXSACKIE MYOCARDITIS  
 074.3 HAND- FOOT & MOUTH DIS (ICD9)  
 074.8 COXSACKIE VIRUS NEC (ICD9)  
 075 INFECTIOUS MONONUCLEOSIS (ICD9)  
 077.1 EPIDEM KERATOCONJUNCTIV (ICD9)  
 077.2 PHARYNGOCONJUNCT FEVER (ICD9)  
 077.3 ADENOVIRAL CONJUNCT NEC (ICD9)  
 077.4 EPIDEM HEM CONJUNCTIVIT (ICD9)  
 077.8 VIRAL CONJUNCTIVITIS NEC (ICD9)  
 077.99 DIS OF CONJUNCT DUE TO VIRUSES (Begin 1993) (ICD9)  
 078.0 MOLLUSCUM CONTAGIOSUM (ICD9)  
 078.1 VIRAL WARTS (End 1993) (ICD9)  
 078.10 VIRAL WARTS UNSPEC (Begin 1993) (ICD9)  
 078.11 CONDYLOMA ACCUMINATUM (Begin 1993) (ICD9)  
 078.12 (no description found)  
 078.19 OTHER SPEC VIRAL WARTS (Begin 1993) (ICD9)  
 078.2 SWEATING FEVER (ICD9)  
 078.4 FOOT & MOUTH DISEASE (ICD9)  
 078.5 CYTOMEGAL INCLUSION DIS (ICD9)  
 078.6 HEM NEPHROSONEPHRITIS (ICD9)  
 078.7 ARENAVIRAL HEM FEVER (ICD9)  
 078.81 EPIDEMIC VERTIGO (ICD9)  
 078.89 VIRAL DISEASE NEC (ICD9)  
 079.1 ECHO VIRUS INFECT NOS (ICD9)  
 079.2 COXSACKIE VIRUS INF NOS (ICD9)  
 079.4 HUMAN PAPILLOMA VIRUS (Begin 1993) (ICD9)  
 079.50 UNSPEC RETROVIRUS (Begin 1993) (ICD9)  
 079.51 HTLV TYPE I (Begin 1993) (ICD9)  
 079.52 HTLV TYPE II (Begin 1993) (ICD9)  
 079.53 HIV TYPE 2 (Begin 1993) (ICD9)  
 079.59 OTH SPEC RETROVIRUS (Begin 1993) (ICD9)  
 079.81 HANTAVIRUS INFECTION (Begin 1995) (ICD9)

079.83 PARVOVIRUS B19 (Begin 2007) (ICD9)  
 079.89 OTH SPEC VIRAL INFECTION (Begin 1993) (ICD9)  
 079.99 VIRAL INFECTION NOS (Begin 1993) (ICD9)  
 323.0 ENCEPHALIT IN VIRAL DIS (ICD9)  
 323.02 MYELITIS-OTH VIRAL DIS (Begin 2006) (ICD9)  
 488.09 FLU D/T IDENTIFIED AVIAN FLU VIRUS WITH OTHER MANIFESTATIONS  
 488.19 FLU D/T IDENTIFIED 2009 H1N1 FLU VIRUS WITH OTHER MANIFESTATIONS  
 488.89 FLU D/T IDENTIFIED NOVEL INFLUENZA A VIRUS W/ OTHER MANIFESTATIONS  
 573.1 HEPATITIS IN VIRAL DIS (ICD9)  
 647.50 RUBELLA IN PREG-UNSPEC (ICD9)  
 647.51 RUBELLA-DELIVERED (ICD9)  
 647.52 RUBELLA-DELIVERED W P/P (ICD9)  
 647.53 RUBELLA-ANTEPARTUM (ICD9)  
 647.54 RUBELLA-POSTPARTUM (ICD9)  
 647.60 OTH VIRUS IN PREG-UNSPEC (ICD9)  
 647.61 OTH VIRAL DIS-DELIVERED (ICD9)  
 647.62 OTH VIRAL DIS-DEL W P/P (ICD9)  
 647.63 OTH VIRAL DIS-ANTEPARTUM (ICD9)  
 647.64 OTH VIRAL DIS-POSTPARTUM (ICD9)  
 695.3 ROSACEA (ICD9)  
 711.50 VIRAL ARTHRITIS-UNSPEC (ICD9)  
 711.51 VIRAL ARTHRITIS-SHLDER (ICD9)  
 711.52 VIRAL ARTHRITIS-UP/ARM (ICD9)  
 711.53 VIRAL ARTHRITIS-FOREARM (ICD9)  
 711.54 VIRAL ARTHRITIS-HAND (ICD9)  
 711.55 VIRAL ARTHRITIS-PELVIS (ICD9)  
 711.56 VIRAL ARTHRITIS-L/LEG (ICD9)  
 711.57 VIRAL ARTHRITIS-ANKLE (ICD9)  
 711.58 VIRAL ARTHRITIS NEC (ICD9)  
 711.59 VIRAL ARTHRITIS-MULT (ICD9)  
 771.0 CONGENITAL RUBELLA (ICD9)  
 771.1 CONGENITAL CYTOMEGALOVIRUS INFECTION (ICD9)  
 790.8 VIREMIA NOS- (ICD9)  
 795.8 POSITIVE SERO/VIRAL HIV (Begin 1986 (ICD9)  
 V08 HIV POSITIVE NOS (Begin 1994) (ICD9)

A80.1 Acute paralytic poliomyelitis, wild virus, imported  
 A80.2 Acute paralytic poliomyelitis, wild virus, indigenous  
 A80.3 Acute paralytic poliomyelitis, other and unspecified (ICD10)  
 A80.4 Acute nonparalytic poliomyelitis (ICD10)  
 A80.9 Acute poliomyelitis, unspecified (ICD10)  
 A81.8 Other atypical virus infections of central nervous system (ICD10)  
 A81.9 Atypical virus infection of central nervous system, unspecified  
 A82.0 Sylvatic rabies  
 A82.1 Urban rabies  
 A82.9 Rabies, unspecified (ICD10)  
 A83.0 Japanese encephalitis (ICD10)  
 A83.1 Western equine encephalitis (ICD10)  
 A83.2 Eastern equine encephalitis (ICD10)  
 A83.3 St Louis encephalitis (ICD10)  
 A83.4 Australian encephalitis (ICD10)  
 A83.5 California encephalitis (ICD10)  
 A83.6 Rocio virus disease  
 A83.8 Other mosquito-borne viral encephalitis (ICD10)  
 A83.9 Mosquito-borne viral encephalitis, unspecified (ICD10)  
 A84.0 Far Eastern tick-borne encephalitis [Russian spring-summer encephalitis] (ICD10)  
 A84.1 Central European tick-borne encephalitis (ICD10)  
 A84.8 Other tick-borne viral encephalitis (ICD10)  
 A84.9 Tick-borne viral encephalitis, unspecified (ICD10)  
 A85.0 Enteroviral encephalitis

A85.1 Adenoviral encephalitis  
 A85.2 Arthropod-borne viral encephalitis, unspecified (ICD10)  
 A85.8 Other specified viral encephalitis  
 A86 Unspecified viral encephalitis  
 A87.0+ Enteroviral meningitis (ICD10)  
 A87.1+ Adenoviral meningitis (ICD10)  
 A87.2 Lymphocytic choriomeningitis (ICD10)  
 A87.8 Other viral meningitis  
 A87.9 Viral meningitis, unspecified  
 A88.0 Enteroviral exanthematous fever  
 A88.8 Other specified viral infections of central nervous system (ICD10)  
 A89 Unspecified viral infection of central nervous system (ICD10)  
 A90 Dengue fever [classical dengue] (ICD10)  
 A91 Dengue haemorrhagic fever  
 A92.0 Chikungunya virus disease  
 A92.1 O'nyong-nyong fever  
 A92.2 Venezuelan equine fever (ICD10)  
 A92.3 West Nile virus infection  
 A92.4 Rift Valley fever  
 A92.8 Other specified mosquito-borne viral fevers (ICD10)  
 A92.9 Mosquito-borne viral fever, unspecified  
 A93.0 Oropouche virus disease  
 A93.2 Colorado tick fever (ICD10)  
 A93.8 Other specified arthropod-borne viral fevers (ICD10)  
 A94 Unspecified arthropod-borne viral fever (ICD10)  
 A95.0 Sylvatic yellow fever (ICD10)  
 A95.1 Urban yellow fever (ICD10)  
 A95.9 Yellow fever, unspecified (ICD10)  
 A96.0 Junin haemorrhagic fever  
 A96.1 Machupo haemorrhagic fever  
 A96.2 Lassa fever  
 A96.8 Other arenaviral hemorrhagic fevers (ICD10)  
 A96.9 Arenaviral haemorrhagic fever, unspecified  
 A98.0 Crimean-Congo hemorrhagic fever (ICD10)  
 A98.1 Omsk hemorrhagic fever (ICD10)  
 A98.2 Kyasanur Forest disease (ICD10)  
 A98.3 Marburg virus disease  
 A98.4 Ebola virus disease  
 A98.5 Hemorrhagic fever with renal syndrome (ICD10)  
 A98.8 Other specified viral haemorrhagic fevers  
 A99 Unspecified viral haemorrhagic fever  
 B00.1 Herpesviral vesicular dermatitis (ICD10)  
 B00.2 Herpesviral gingivostomatitis and pharyngotonsillitis (ICD10)  
 B00.3+ Herpesviral meningitis (ICD10)  
 B00.4+ Herpesviral encephalitis (ICD10)  
 B00.5+ Herpesviral ocular disease (ICD10)  
 B00.7 Disseminated herpesviral disease (ICD10)  
 B00.8 Other forms of herpesviral infection (ICD10)  
 B00.9 Herpesviral infection, unspecified (ICD10)  
 B01.0 Varicella meningitis  
 B01.1+ Varicella encephalitis (G05.1\*) (ICD10)  
 B01.8 Varicella with other complications (ICD10)  
 B01.9 Varicella without complication (ICD10)  
 B02.0 Zoster encephalitis  
 B02.1+ Zoster meningitis (ICD10)  
 B02.2+ Zoster with other nervous system involvement (ICD10)  
 B02.3+ Zoster ocular disease (ICD10)  
 B02.7 Disseminated zoster  
 B02.8 Zoster with other complications (ICD10)  
 B02.9 Zoster without complications (ICD10)

B03 Smallpox (ICD10)  
 B04 Monkeypox  
 B05.0+ Measles complicated by encephalitis (ICD10)  
 B05.1 Measles complicated by meningitis  
 B05.4 Measles with intestinal complications  
 B05.8 Measles with other complications (ICD10)  
 B05.9 Measles without complication (ICD10)  
 B06.0+ Rubella with neurological complications (ICD10)  
 B06.8 Rubella with other complications (ICD10)  
 B06.9 Rubella without complication (ICD10)  
 B07 Viral warts (ICD10)  
 B08.0 Other orthopoxvirus infections (ICD10)  
 B08.1 Molluscum contagiosum (ICD10)  
 B08.2 Exanthema subitum [sixth disease]  
 B08.3 Erythema infectiosum [fifth disease] (ICD10)  
 B08.4 Enteroviral vesicular stomatitis with exanthem (ICD10)  
 B08.5 Enteroviral vesicular pharyngitis (ICD10)  
 B08.8 Other specified viral infections characterized by skin and mucous membrane lesions (ICD10)  
 B09 Unspecified viral infection characterized by skin and mucous membrane lesions (ICD10)  
 B15.0 Hepatitis A with hepatic coma (ICD10)  
 B15.9 Hepatitis A without hepatic coma (ICD10)  
 B16.0 Acute hepatitis B with delta-agent with hepatic coma (ICD10)  
 B16.1 Acute hepatitis B with delta-agent without hepatic coma (ICD10)  
 B16.2 Acute hepatitis B without delta-agent with hepatic coma (ICD10)  
 B16.9 Acute hepatitis B without delta-agent and without hepatic coma  
 B17.0 Acute delta-(super) infection of hepatitis B carrier (ICD10)  
 B17.1 Acute hepatitis C (ICD10)  
 B17.2 Acute hepatitis E (ICD10)  
 B17.8 Other specified acute viral hepatitis (ICD10)  
 B17.9 Acute viral hepatitis, unspecified  
 B18.0 Chronic viral hepatitis B with delta-agent (ICD10)  
 B18.1 Chronic viral hepatitis B without delta-agent (ICD10)  
 B18.2 Chronic viral hepatitis C (ICD10)  
 B18.8 Other chronic viral hepatitis  
 B18.9 Chronic viral hepatitis, unspecified  
 B19.0 Unspecified viral hepatitis with hepatic coma (ICD10)  
 B19.9 Unspecified viral hepatitis without hepatic coma (ICD10)  
 B20.0 HIV disease resulting in mycobacterial infection  
 B20.1 HIV disease resulting in other bacterial infections  
 B20.2 HIV disease resulting in cytomegaloviral disease  
 B20.3 HIV disease resulting in other viral infections  
 B20.4 HIV disease resulting in candidiasis  
 B20.5 HIV disease resulting in other mycoses  
 B20.6 HIV disease resulting in Pneumocystis jirovecii pneumonia  
 B20.7 HIV disease resulting in multiple infections  
 B20.8 HIV disease resulting in other infectious and parasitic diseases  
 B20.9 HIV disease resulting in unspecified infectious or parasitic  
 B21.0 HIV disease resulting in Kaposi sarcoma  
 B21.1 HIV disease resulting in Burkitt lymphoma  
 B21.2 HIV disease resulting in other types of non-Hodgkin lymphoma  
 B21.3 HIV disease resulting in other malignant neoplasms of lymphoid, haematopoietic and related tissue  
 B21.7 HIV disease resulting in multiple malignant neoplasms  
 B21.8 HIV disease resulting in other malignant neoplasms  
 B21.9 HIV disease resulting in unspecified malignant neoplasm  
 B22.0 HIV disease resulting in encephalopathy  
 B22.1 HIV disease resulting in lymphoid interstitial pneumonitis  
 B22.2 HIV disease resulting in wasting syndrome  
 B22.7 HIV disease resulting in multiple diseases classified elsewhere  
 B23.0 Acute HIV infection syndrome  
 B23.1 HIV disease resulting in (persistent) generalized lymphadenopathy

B23.2 HIV disease resulting in haematological and immunological abnormalities, not elsewhere classified  
 B23.8 HIV disease resulting in other specified conditions  
 B24 Unspecified human immunodeficiency virus [HIV] disease (ICD10)  
 B25.0 Cytomegaloviral pneumonitis  
 B25.1 Cytomegaloviral hepatitis  
 B25.2 Cytomegaloviral pancreatitis  
 B25.8 Other cytomegaloviral diseases  
 B25.9 Cytomegaloviral disease, unspecified (ICD10)  
 B26.0+ Mumps orchitis (ICD10)  
 B26.1+ Mumps meningitis (ICD10)  
 B26.2+ Mumps encephalitis (ICD10)  
 B26.3+ Mumps pancreatitis (ICD10)  
 B26.8 Mumps with other complications (ICD10)  
 B26.8+ (no description found)  
 B26.9 Mumps without complication (ICD10)  
 B27.0 Gammaherpesviral mononucleosis  
 B27.1 Cytomegaloviral mononucleosis  
 B27.8 Other infectious mononucleosis  
 B27.9 Infectious mononucleosis, unspecified (ICD10)  
 B30.0+ Keratoconjunctivitis due to adenovirus (ICD10)  
 B30.1+ Conjunctivitis due to adenovirus (ICD10)  
 B30.2+ (no description found)  
 B30.3+ Acute epidemic hemorrhagic conjunctivitis (enteroviral)  
 B30.8+ Other viral conjunctivitis (ICD10)  
 B30.9 Viral conjunctivitis, unspecified  
 B33.0 Epidemic myalgia (ICD10)  
 B33.1 Ross River disease  
 B33.2 Viral carditis  
 B33.3 Retrovirus infections, not elsewhere classified (ICD10)  
 B33.4 Hantavirus (cardio-) pulmonary syndrome  
 B33.8 Other specified viral diseases (ICD10)  
 B34.1 Enterovirus infection, unspecified (ICD10)  
 B34.2 Coronavirus infection, unspecified site  
 B34.3 Parvovirus infection, unspecified site  
 B34.4 Papovavirus infection, unspecified (ICD10)  
 B34.8 Other viral infections of unspecified site (ICD10)  
 B34.9 Viral infection, unspecified (ICD10)  
 B97.0 Adenovirus as the cause of diseases classified to other chapters  
 B97.1 Enterovirus as the cause of diseases classified to other chapters  
 B97.2 Coronavirus as the cause of diseases classified to other chapters  
 B97.3 Retrovirus as the cause of diseases classified to other chapters  
 B97.4 Respiratory syncytial virus as the cause of diseases classified to other chapters  
 B97.5 Reovirus as the cause of diseases classified to other chapters  
 B97.6 Parvovirus as the cause of diseases classified to other chapters  
 B97.7 Papillomavirus as the cause of diseases classified to other chapters  
 B97.8 Other viral agents as the cause of diseases classified to other chapters  
 G02.0\* Meningitis in viral diseases classified elsewhere (ICD10)  
 G05.1\* Encephalitis, myelitis and encephalomyelitis in viral diseases classified elsewhere (ICD10)  
 H19.1 Herpesviral keratitis and keratoconjunctivitis  
 I41.1 Myocarditis in viral diseases classified elsewhere  
 J10.8 Influenza with other manifestations, influenza virus identified  
 J11 Influenza, virus not identified (ICD10)  
 J11.8 Influenza with other manifestations, virus not identified (ICD10)  
 M01.4 Rubella arthritis  
 M01.50\* Arthritis in other viral diseases classified elsewhere, multiple sites (ICD10)  
 M01.51\* Arthritis in other viral diseases classified elsewhere, shoulder region (ICD10)  
 M01.52\* Arthritis in other viral diseases classified elsewhere, upper arm (ICD10)  
 M01.53\* Arthritis in other viral diseases classified elsewhere, forearm (ICD10)  
 M01.54\* Arthritis in other viral diseases classified elsewhere, hand (ICD10)  
 M01.55\* Arthritis in other viral diseases classified elsewhere, pelvic region and thigh (ICD10)

M01.56\* Arthritis in other viral diseases classified elsewhere, lower leg (ICD10)  
M01.57\* Arthritis in other viral diseases classified elsewhere, ankle and foot (ICD10)  
M01.58\* Arthritis in other viral diseases classified elsewhere, other site (ICD10)  
M01.59\* Arthritis in other viral diseases classified elsewhere, site unspecified (ICD10)  
O98.4 Viral hepatitis complicating pregnancy, childbirth and the puerperium  
O98.5 Other viral diseases complicating pregnancy, childbirth and the puerperium (ICD10)  
P35.0 Congenital rubella syndrome  
P35.1 Congenital cytomegalovirus infection  
P35.2 Congenital herpesviral [herpes simplex] infection  
P35.3 Congenital viral hepatitis  
P35.8 Other congenital viral diseases  
P35.9 Congenital viral disease, unspecified  
Z21 Asymptomatic human immunodeficiency virus [HIV] infection status



**Supplementary Table: Numbers of participants followed within each age stratum and the rate of infection-related hospitalisation in infection categories.**

| Age Period | Number of individual followed | Person years contributed | Age period specific rate per 1000py |                    |                  |                         |                      |                         |               |             |
|------------|-------------------------------|--------------------------|-------------------------------------|--------------------|------------------|-------------------------|----------------------|-------------------------|---------------|-------------|
|            |                               |                          | Any infection                       | Invasive Bacterial | Gastrointestinal | Lower Respiratory Tract | Skin and Soft Tissue | Upper Respiratory Tract | Genitourinary | Other Viral |
| 0-28d      | 711408                        | 37992.6                  | 148.2                               | 9.0                | 14.8             | 30.4                    | 10.6                 | 21.2                    | 15.4          | 19.8        |
| 1-3mos     | 716828                        | 177250.0                 | 112.6                               | 2.5                | 16.6             | 49.6                    | 3.1                  | 20.1                    | 11.0          | 15.0        |
| 4-6mos     | 709550                        | 173918.8                 | 96.8                                | 1.8                | 16.8             | 45.3                    | 2.8                  | 22.4                    | 6.6           | 10.5        |
| 7-12mos    | 702352                        | 295414.1                 | 105.6                               | 1.8                | 21.9             | 37.0                    | 3.2                  | 35.8                    | 4.4           | 11.5        |
| 1-2yr      | 689714                        | 676796.7                 | 99.0                                | 1.7                | 17.9             | 23.2                    | 3.4                  | 45.6                    | 2.3           | 10.9        |
| 2-5yr      | 661124                        | 1860369.6                | 55.0                                | 0.7                | 6.1              | 9.6                     | 2.0                  | 30.3                    | 1.1           | 4.6         |
| 5-10yr     | 579952                        | 2610814.5                | 30.0                                | 0.4                | 1.9              | 3.2                     | 1.4                  | 18.5                    | 0.6           | 2.6         |
| 10-14yr    | 466066                        | 1681040.4                | 13.9                                | 0.4                | 1.2              | 1.3                     | 1.2                  | 6.8                     | 0.4           | 1.9         |
| 14-18yr    | 373978                        | 1311430.5                | 16.2                                | 0.5                | 1.0              | 1.2                     | 2.1                  | 6.8                     | 1.4           | 2.1         |

**Supplementary Table: Change in rate for gestational age, birthweight, and birth length by infection category.**

Rate increase for 1 week decrease in gestational age from 39-40 weeks

|                         | IRR  | 95% CI      | %increase |
|-------------------------|------|-------------|-----------|
| Any infection           | 1.12 | 1.12 - 1.13 | 12.34     |
| Invasive Bacterial      | 1.10 | 1.08 - 1.13 | 10.31     |
| Gastrointestinal        | 1.12 | 1.10 - 1.13 | 11.67     |
| Lower Respiratory Tract | 1.20 | 1.19 - 1.21 | 19.86     |
| Skin and Soft Tissue    | 1.08 | 1.06 - 1.10 | 8.34      |
| Upper Respiratory Tract | 1.10 | 1.10 - 1.11 | 10.36     |
| Genitourinary           | 1.13 | 1.10 - 1.16 | 13.09     |
| Other Viral             | 1.13 | 1.12 - 1.14 | 13.1      |

Rate increase for 500g decrease in birthweight from 3000-3500g

|                         | IRR  | 95% CI      | %increase |
|-------------------------|------|-------------|-----------|
| Any infection           | 1.20 | 1.18 - 1.21 | 19.69     |
| Invasive Bacterial      | 1.22 | 1.16 - 1.29 | 22.45     |
| Gastrointestinal        | 1.20 | 1.18 - 1.23 | 20.49     |
| Lower Respiratory Tract | 1.33 | 1.31 - 1.35 | 32.99     |
| Skin and Soft Tissue    | 1.16 | 1.11 - 1.2  | 15.60     |
| Upper Respiratory Tract | 1.16 | 1.14 - 1.18 | 16.04     |
| Genitourinary           | 1.20 | 1.15 - 1.26 | 20.23     |
| Other Viral             | 1.21 | 1.18 - 1.23 | 20.91     |

Rate increase for 5cm decrease in birth length from 46-50cm

|                         | IRR  | 95% CI      | %increase |
|-------------------------|------|-------------|-----------|
| Any infection           | 1.41 | 1.38 - 1.45 | 41.04     |
| Invasive Bacterial      | 1.44 | 1.3 - 1.61  | 44.48     |
| Gastrointestinal        | 1.39 | 1.33 - 1.46 | 39.12     |
| Lower Respiratory Tract | 1.71 | 1.64 - 1.78 | 70.83     |
| Skin and Soft Tissue    | 1.33 | 1.21 - 1.46 | 33.02     |
| Upper Respiratory Tract | 1.33 | 1.29 - 1.37 | 32.81     |
| Genitourinary           | 1.43 | 1.27 - 1.61 | 43.12     |
| Other Viral             | 1.44 | 1.38 - 1.51 | 44.16     |

Adjusted for maternal age (<20,20-24,25-29,30-24, >=35 years), parity (no previous birth/yes previous birth), birth cohort (2 year blocks), season of birth, sex, mode of delivery (vaginal/caesarean), 5 minute APGAR score (0-7,8-10), bronchopulmonary dysplasia (present/absent), socioeconomic status (percentile: >90 (highest), 75-90, 50-75, 25-50, 10-25, <10).

**Supplementary Table: Overall adjusted childhood infection-related hospitalisation rate ratio and 95% confidence interval in total population and in children not considered to be at high risk.**

| Gestational Age (wks)    | Total Population |               | No neurodevelopmental disability |             | No Complications during Pregnancy |             | No Medical Conditions during Pregnancy |             |
|--------------------------|------------------|---------------|----------------------------------|-------------|-----------------------------------|-------------|----------------------------------------|-------------|
|                          | n=719,311        |               | n=259,752                        |             | n=482,036                         |             | n=570,428                              |             |
| <28                      | 2.91             | (2.55-3.33)   | 3.47                             | (2.84-4.23) | 2.12                              | (1.47-3.06) | 2.86                                   | (2.40-3.42) |
| 28-29                    | 2.49             | (2.24-2.78)   | 2.78                             | (2.32-3.32) | 2.52                              | (1.84-3.44) | 2.45                                   | (2.13-2.82) |
| 30-31                    | 2.29             | (2.07-2.53)   | 2.48                             | (2.15-2.86) | 1.92                              | (1.50-2.46) | 2.17                                   | (1.91-2.46) |
| 32-34                    | 1.72             | (1.64-1.81)   | 1.71                             | (1.59-1.85) | 1.56                              | (1.35-1.79) | 1.65                                   | (1.56-1.74) |
| 35                       | 1.57             | (1.49-1.65)   | 1.55                             | (1.44-1.67) | 1.5                               | (1.36-1.67) | 1.53                                   | (1.44-1.63) |
| 36                       | 1.44             | (1.39-1.49)   | 1.43                             | (1.35-1.51) | 1.41                              | (1.33-1.51) | 1.4                                    | (1.35-1.46) |
| 37                       | 1.31             | (1.28-1.34)   | 1.29                             | (1.25-1.34) | 1.29                              | (1.25-1.34) | 1.32                                   | (1.28-1.36) |
| 38                       | 1.15             | (1.13-1.17)   | 1.14                             | (1.12-1.17) | 1.14                              | (1.12-1.16) | 1.15                                   | (1.12-1.17) |
| 39-40 (ref)              | 1.00             | --            | 1.00                             | --          | 1.00                              | --          | 1.00                                   | --          |
| 41                       | 0.94             | (0.92-0.96)   | 0.89                             | (0.86-0.92) | 0.96                              | (0.94-0.98) | 0.95                                   | (0.93-0.97) |
| ≥42                      | 0.99             | (0.94-1.04)   | 0.88                             | (0.78-0.98) | 1                                 | (0.95-1.06) | 0.97                                   | (0.92-1.03) |
| <b>Birthweight (g)</b>   |                  |               |                                  |             |                                   |             |                                        |             |
| ≤1000                    | 2.51             | (2.21-2.85)   | 2.8                              | (2.32-3.38) | 1.83                              | (1.19-2.79) | 2.55                                   | (2.15-3.02) |
| >1000-1500               | 2.30             | (2.10-2.51)   | 2.37                             | (2.06-2.73) | 2.35                              | (1.84-3.01) | 2.25                                   | (2.03-2.49) |
| >1500-2000               | 1.82             | (1.71-1.94)   | 1.78                             | (1.62-1.96) | 1.75                              | (1.44-2.13) | 1.73                                   | (1.59-1.88) |
| >2000-2500               | 1.42             | (1.37-1.47)   | 1.27                             | (1.20-1.35) | 1.42                              | (1.33-1.52) | 1.41                                   | (1.35-1.47) |
| >2500-3000               | 1.14             | (1.12-1.16)   | 1.06                             | (1.03-1.09) | 1.11                              | (1.09-1.14) | 1.13                                   | (1.10-1.15) |
| >3000-3500 (ref)         | 1.00             | --            | 1.00                             | --          | 1.00                              | --          | 1.00                                   | --          |
| >3500-4000               | 0.94             | (0.93-0.95)   | 0.95                             | (0.93-0.97) | 0.95                              | (0.94-0.97) | 0.94                                   | (0.92-0.95) |
| >4000-4500               | 0.90             | (0.88-0.92)   | 0.91                             | (0.88-0.94) | 0.93                              | (0.9-0.95)  | 0.9                                    | (0.88-0.92) |
| >4500                    | 0.93             | (0.89-0.98)   | 0.95                             | (0.88-1.03) | 0.96                              | (0.9-1.01)  | 0.95                                   | (0.90-1.00) |
| <b>Birth Length (cm)</b> |                  |               |                                  |             |                                   |             |                                        |             |
| ≤30                      | 2.38             | (1.85 - 3.07) | 3.23                             | (2.06-5.06) | 1.51                              | (0.79-2.88) | 2.45                                   | (1.72-3.50) |
| >30-35                   | 2.17             | (1.91 - 2.47) | 2.72                             | (2.21-3.35) | 1.17                              | (0.85-1.61) | 2.11                                   | (1.78-2.50) |
| >35-40                   | 2.11             | (1.93 - 2.29) | 2.14                             | (1.87-2.45) | 1.75                              | (1.40-2.20) | 1.99                                   | (1.80-2.20) |
| >40-45                   | 1.45             | (1.40 - 1.50) | 1.39                             | (1.31-1.46) | 1.31                              | (1.24-1.39) | 1.4                                    | (1.34-1.46) |
| >45-50 (ref)             | 1.00             | --            | 1.00                             | --          | 1.00                              | --          | 1.00                                   | --          |
| >50-55                   | 0.89             | (0.88 - 0.91) | 0.92                             | (0.91-0.94) | 0.92                              | (0.91-0.93) | 0.9                                    | (0.89-0.91) |
| >55-60                   | 0.88             | (0.84 - 0.92) | 0.9                              | (0.83-0.96) | 0.92                              | (0.87-0.97) | 0.88                                   | (0.83-0.93) |
| >60-65                   | 1.09             | (0.70 - 1.70) | 1.08                             | (0.68-1.72) | 1.1                               | (0.61-1.96) | 1.38                                   | (0.86-2.21) |

Adjusted for maternal age (<20,20-24,25-29,30-34, ≥35 years), parity (no previous birth/yes previous birth), birth cohort (2 year blocks), season of birth, sex, mode of delivery (vaginal/caesarean), 5 minute APGAR score (0-7,8-10), bronchopulmonary dysplasia (present/absent), socioeconomic status (percentile: >90 (highest), 75-90, 50-75, 25-50, 10-25, <10).

'No neurodevelopmental disability' group was defined by children without a diagnosed intellectual disability, severe intellectual disability of unknown aetiology, birth defects, cerebral palsy, and whose mothers reported no smoking during pregnancy (where data were available).

'No complications during pregnancy' group was defined by children whose mothers had no recorded complications for the variable 'complications during pregnancy' in the Midwives' Notification System

'No medical conditions during pregnancy' group was defined by children whose mothers had no recorded medical conditions for the variable 'medical conditions during pregnancy' in the Midwives' Notification System

**Supplementary Table: Overall adjusted childhood infection-related hospitalisation rate ratio and 95% confidence interval with and without adjustments for socioeconomic status and smoking during pregnancy in model.**

| Gestational Age (wks)    | Fully adjusted |               | Fully adjusted + smoking status |             | Socioeconomic status not included in model |             |
|--------------------------|----------------|---------------|---------------------------------|-------------|--------------------------------------------|-------------|
|                          | HR             | 95% CI        | HR                              | 95% CI      | RR                                         | 95%CI       |
| <28                      | 2.91           | (2.55-3.33)   | 2.96                            | (2.53-3.47) | 2.93                                       | (2.60-3.30) |
| 28-29                    | 2.49           | (2.24-2.78)   | 2.82                            | (2.44-3.25) | 2.47                                       | (2.25-2.71) |
| 30-31                    | 2.29           | (2.07-2.53)   | 2.68                            | (2.35-3.04) | 2.24                                       | (2.06-2.45) |
| 32-34                    | 1.72           | (1.64-1.81)   | 1.89                            | (1.77-2.02) | 1.71                                       | (1.64-1.79) |
| 35                       | 1.57           | (1.49-1.65)   | 1.7                             | (1.58-1.84) | 1.55                                       | (1.48-1.63) |
| 36                       | 1.44           | (1.39-1.49)   | 1.53                            | (1.45-1.61) | 1.41                                       | (1.37-1.46) |
| 37                       | 1.31           | (1.28-1.34)   | 1.35                            | (1.30-1.40) | 1.3                                        | (1.27-1.33) |
| 38                       | 1.15           | (1.13-1.17)   | 1.17                            | (1.15-1.20) | 1.14                                       | (1.12-1.15) |
| 39-40 (ref)              | 1.00           | --            | 1.00                            | --          | 1.00                                       | --          |
| 41                       | 0.94           | (0.92-0.96)   | 0.90                            | (0.88-0.93) | 0.94                                       | (0.93-0.96) |
| ≥42                      | 0.99           | (0.94-1.04)   | 0.91                            | (0.82-1.01) | 1.02                                       | (0.99-1.06) |
| <b>Birthweight (g)</b>   |                |               |                                 |             |                                            |             |
| ≤1000                    | 2.51           | (2.21-2.85)   | 2.63                            | (2.26-3.07) | 2.61                                       | (2.32-2.94) |
| >1000-1500               | 2.30           | (2.10-2.51)   | 2.51                            | (2.23-2.81) | 2.3                                        | (2.12-2.49) |
| >1500-2000               | 1.82           | (1.71-1.94)   | 2.01                            | (1.84-2.19) | 1.87                                       | (1.77-1.98) |
| >2000-2500               | 1.42           | (1.37-1.47)   | 1.42                            | (1.35-1.50) | 1.43                                       | (1.39-1.48) |
| >2500-3000               | 1.14           | (1.12-1.16)   | 1.12                            | (1.09-1.15) | 1.14                                       | (1.12-1.16) |
| >3000-3500 (ref)         | 1.00           | --            | 1.00                            | --          | 1.00                                       | --          |
| >3500-4000               | 0.94           | (0.93-0.95)   | 0.93                            | (0.91-0.95) | 0.94                                       | (0.93-0.95) |
| >4000-4500               | 0.90           | (0.88-0.92)   | 0.90                            | (0.87-0.93) | 0.90                                       | (0.89-0.92) |
| >4500                    | 0.93           | (0.89-0.98)   | 0.91                            | (0.84-0.97) | 0.93                                       | (0.89-0.97) |
| <b>Birth Length (cm)</b> |                |               |                                 |             |                                            |             |
| ≤30                      | 2.38           | (1.85 - 3.07) | 2.52                            | (1.86-3.42) | 2.51                                       | (1.95-3.21) |
| >30-35                   | 2.17           | (1.91 - 2.47) | 2.64                            | (2.24-3.11) | 2.17                                       | (1.94-2.43) |
| >35-40                   | 2.11           | (1.93 - 2.29) | 2.25                            | (2.02-2.50) | 2.11                                       | (1.95-2.28) |
| >40-45                   | 1.45           | (1.40 - 1.50) | 1.45                            | (1.39-1.52) | 1.46                                       | (1.42-1.51) |
| >45-50 (ref)             | 1.00           | --            | 1.00                            | --          | 1.00                                       | --          |
| >50-55                   | 0.89           | (0.88 - 0.91) | 0.89                            | (0.88-0.91) | 0.90                                       | (0.89-0.91) |
| >55-60                   | 0.88           | (0.84 - 0.92) | 0.88                            | (0.82-0.95) | 0.90                                       | (0.87-0.94) |
| >60-65                   | 1.09           | (0.70 - 1.70) | 0.96                            | (0.61-1.49) | 1.04                                       | (0.75-1.44) |

\*Fully adjusted model includes maternal age (<20,20-24,25-29,30-34, ≥35 years), parity (no previous birth/yes previous birth), birth cohort (2 year blocks), season of birth, sex, mode of delivery (vaginal/caesarean), 5 minute APGAR score (0-7,8-10), bronchopulmonary dysplasia (present/absent), socioeconomic status (percentile: >90 (highest), 75-90, 50-75, 25-50, 10-25, <10).

**Supplementary Figure**

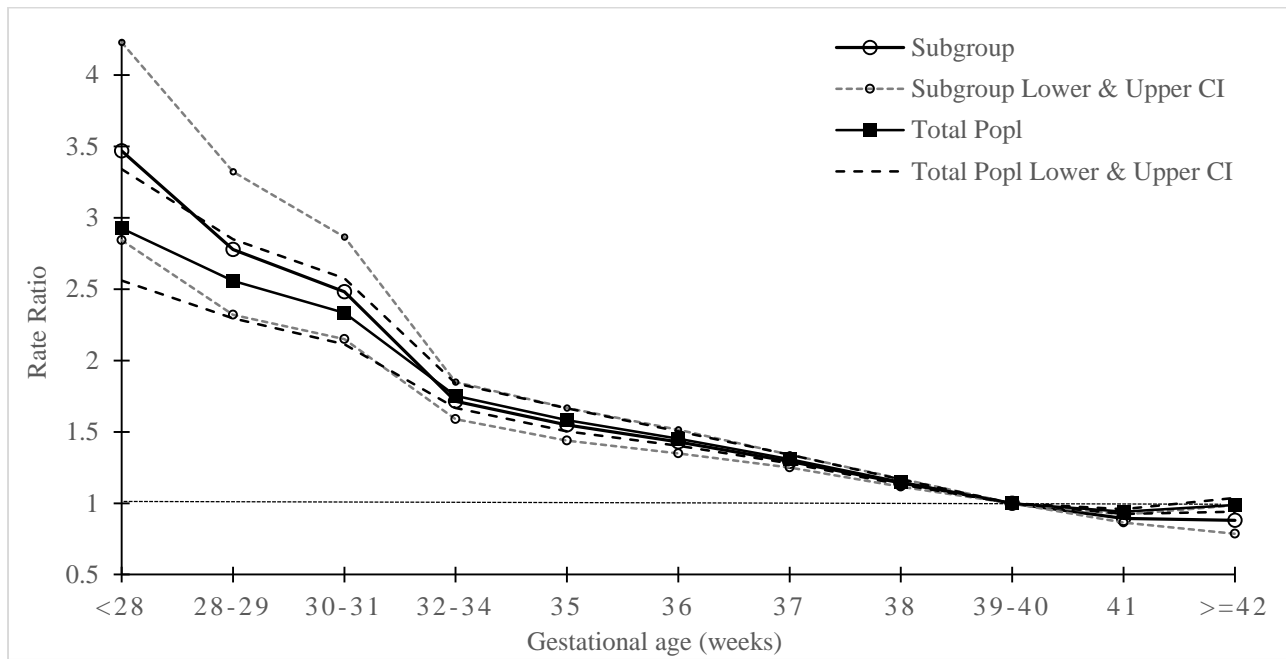

Figure adjusted for maternal age (<20,20-24,25-29,30-34, ≥35 years), parity (no previous birth/yes previous birth), birth cohort (2 year blocks), season of birth, sex, mode of delivery (vaginal/caesarean), 5 minute APGAR score (0-7,8-10), bronchopulmonary dysplasia (present/absent), socioeconomic status (percentile: >90 (highest), 75-90, 50-75, 25-50, 10-25, <10).

**Supplementary Figure**

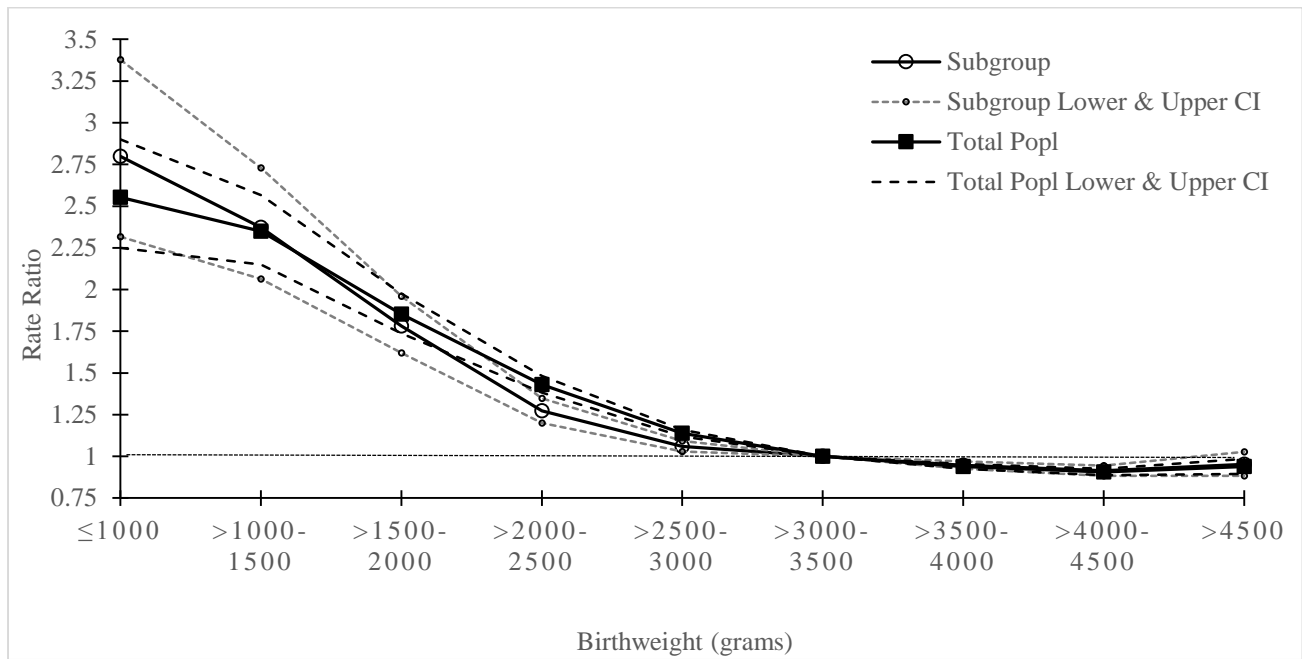

Figure adjusted for maternal age (<20,20-24,25-29,30-34, ≥35 years), parity (no previous birth/yes previous birth), birth cohort (2 year blocks), season of birth, sex, mode of delivery (vaginal/caesarean), 5 minute APGAR score (0-7,8-10), bronchopulmonary dysplasia (present/absent), socioeconomic status (percentile: >90 (highest), 75-90, 50-75, 25-50, 10-25, <10).

**Supplementary Figure**

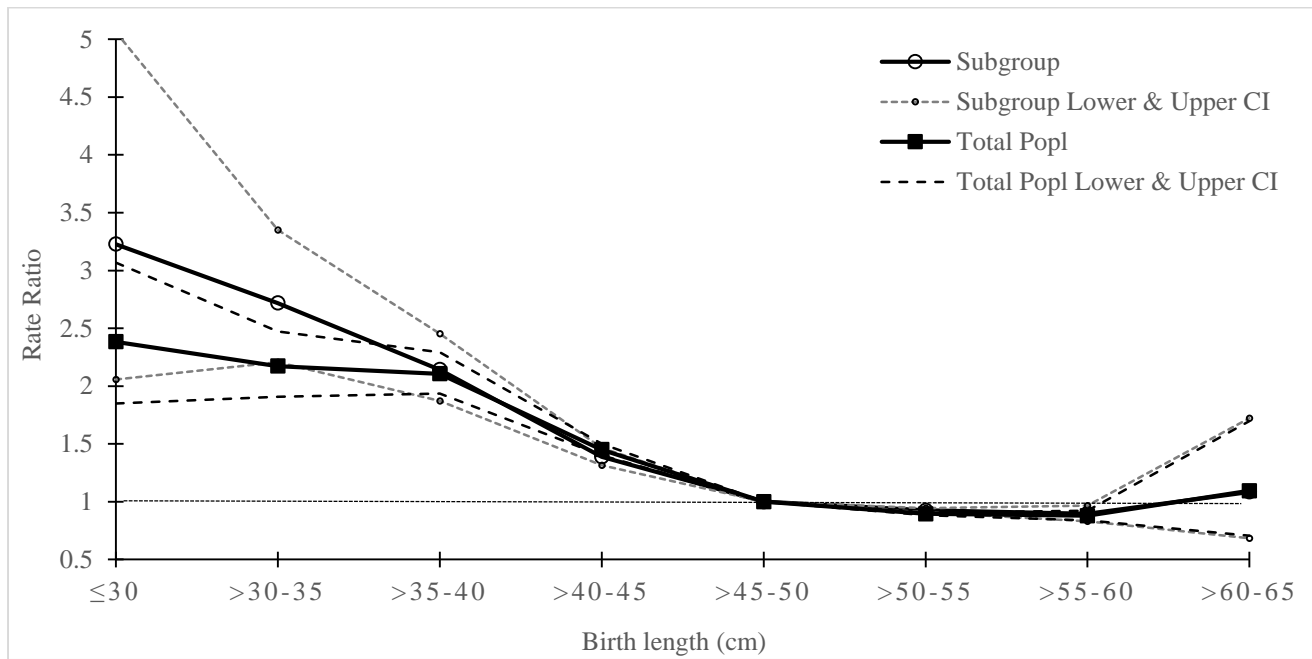

Figure adjusted for maternal age (<20,20-24,25-29,30-24, >=35 years), parity (no previous birth/yes previous birth), birth cohort (2 year blocks), season of birth, sex, mode of delivery (vaginal/caesarean), 5 minute APGAR score (0-7,8-10), bronchopulmonary dysplasia (present/absent), socioeconomic status (percentile: >90 (highest), 75-90, 50-75, 25-50, 10-25, <10).

Supplementary Figure

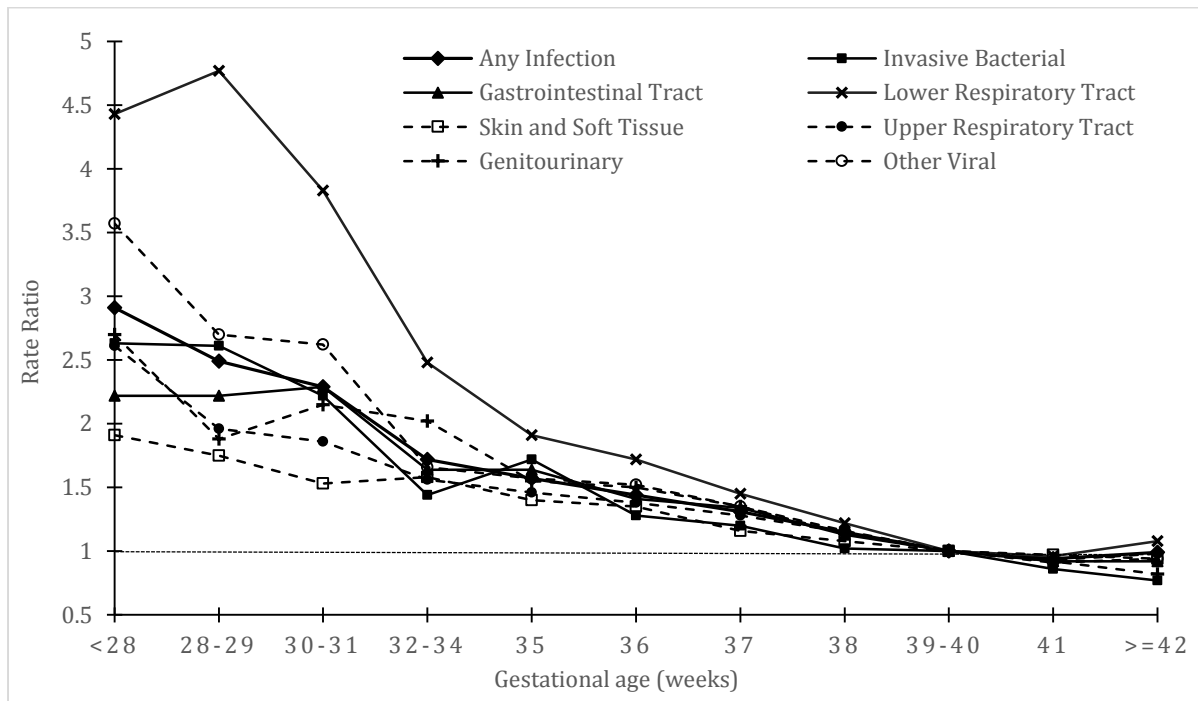

Figure adjusted for maternal age (<20, 20-24, 25-29, 30-34, >=35 years), parity (no previous birth/yes previous birth), birth cohort (2 year blocks), season of birth, sex, mode of delivery (vaginal/caesarean), 5 minute APGAR score (0-7,8-10), bronchopulmonary dysplasia (present/absent), socioeconomic status (percentile: >90 (highest), 75-90, 50-75, 25-50, 10-25, <10).



**Supplementary Figure**

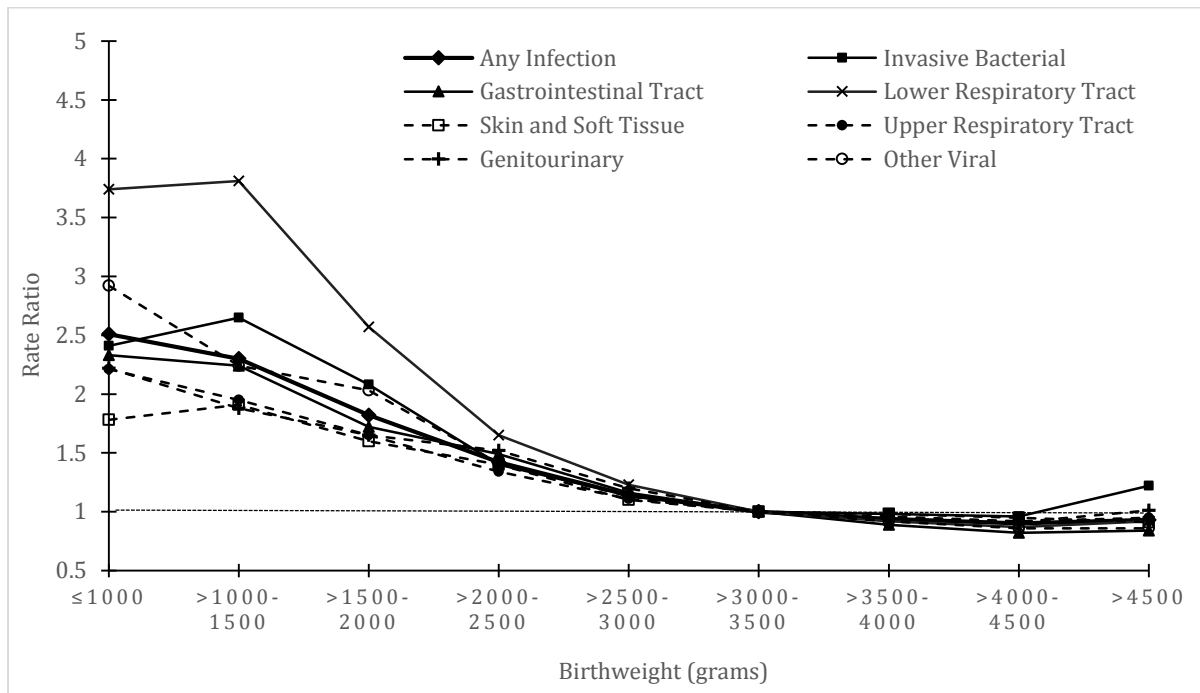

Figure adjusted for maternal age (<20, 20-24, 25-29, 30-34, ≥35 years), parity (no previous birth/yes previous birth), birth cohort (2 year blocks), season of birth, sex, mode of delivery (vaginal/caesarean), 5 minute APGAR score (0-7,8-10), bronchopulmonary dysplasia (present/absent), socioeconomic status (percentile: >90 (highest), 75-90, 50-75, 25-50, 10-25, <10).

**Supplementary Figure**

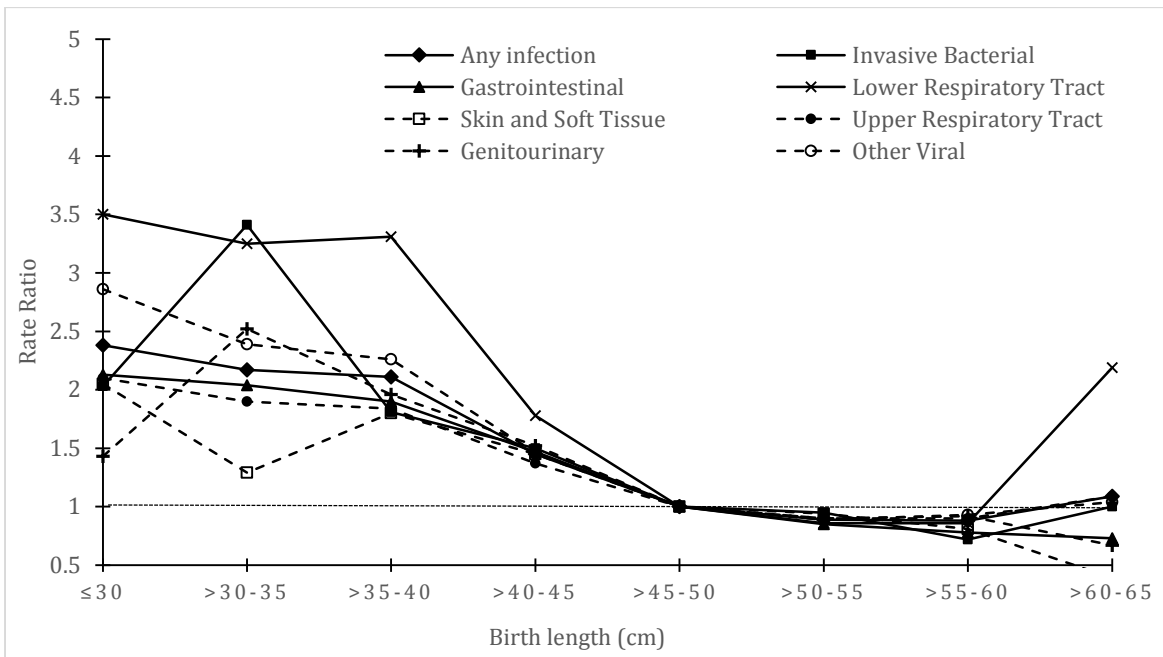

Figure adjusted for maternal age (<20, 20-24, 25-29, 30-34, ≥35 years), parity (no previous birth/yes previous birth), birth cohort (2 year blocks), season of birth, sex, mode of delivery (vaginal/caesarean), 5 minute APGAR score (0-7,8-10), bronchopulmonary dysplasia (present/absent), socioeconomic status (percentile: >90 (highest), 75-90, 50-75, 25-50, 10-25, <10).

**Supplementary Figure**

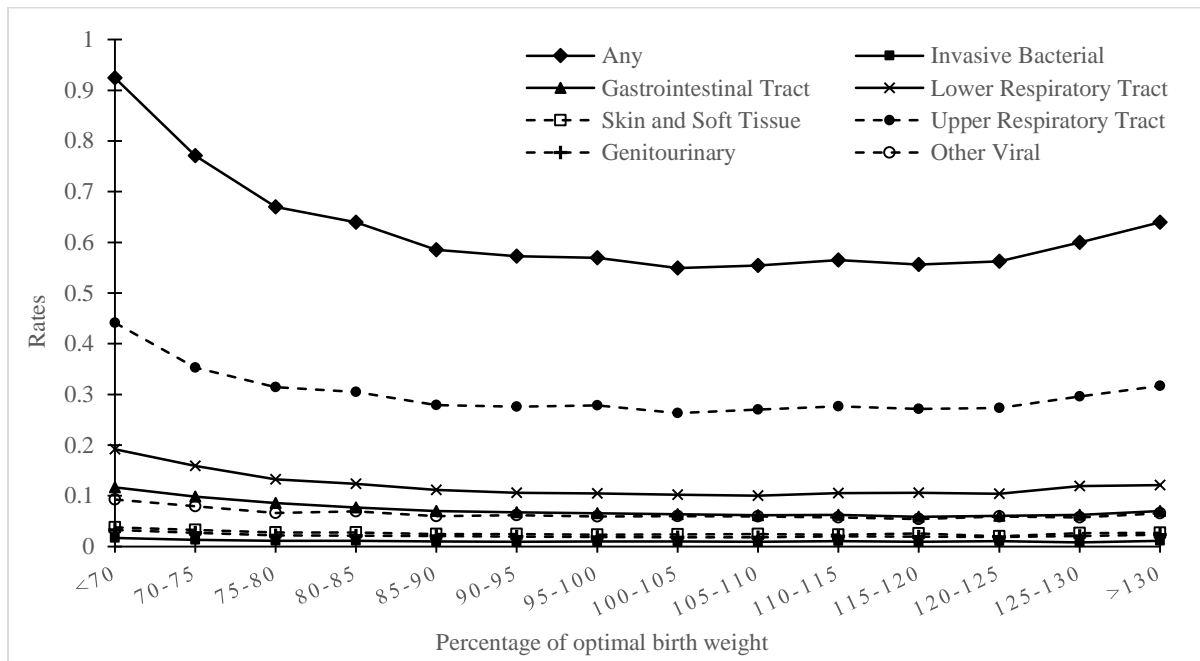

Percentage of optimal birth weight is the ratio, at each gestational age, of an individual’s birth weight to that of the average birth weight born to a Western Australian woman of a similar height, age, and parity (based on a population cohort data from 1998-2002), excluding women with morbidities commonly affecting intrauterine growth (smoking, cardiovascular disease, birth defects, diabetes, congenital infections, and multiple pregnancies).<sup>20</sup> A percentage of optimal birth weight value of <100 indicates that the baby was lighter than expected, whereas a value >100 indicates a baby heavier than expected, based on gestational age and mothers’ characteristics.

Adjusted for maternal age (<20, 20-24, 25-29, 30-34, ≥35 years), parity (no previous birth/yes previous birth), birth cohort (2 year blocks), season of birth, sex, mode of delivery (vaginal/caesarean), 5 minute APGAR score (0-7,8-10), bronchopulmonary dysplasia (present/absent), socioeconomic status (percentile: >90 (highest), 75-90, 50-75, 25-50, 10-25, <10).
